# Supplementary material for: Expedient synthesis of densely substituted pyrrolo[1,2-a]indoles
Source: Royal Society of Chemistry journal article supplement (doi:10.1039/c6ob00861e), 2016-01-01

# Supporting Information

## Diversity Oriented Synthesis of Densely Substituted Pyrrolo[1,2-*a*]indoles

Dr. Dattatraya H. Dethe\* and Raghavender Boda

*Department of Chemistry, Indian Institute of Technology–Kanpur, Kanpur – 208016, India.*

Tel: + 91-512-2596537, Fax: + 91-512-2597436.

### Table of Contents:

|                                                             |      |
|-------------------------------------------------------------|------|
| HPLC graphs of Compound (±)-19 and (-)-19: .....            | 2    |
| CD spectras of Compound (+)-19 and (-)-19: .....            | 3    |
| X-ray crystallographic data and structure refinement: ..... | 4-10 |
| NMR Spectra: .....                                          | 11   |

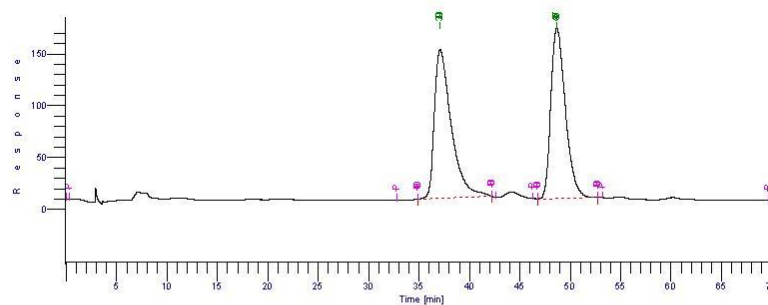

cellulose-2

| Peak # | Component Name | Time [min] | Area [ $\mu\text{V}\cdot\text{sec}$ ] | Height [ $\mu\text{V}$ ] | Area [%] | Norm. Area [%] |
|--------|----------------|------------|---------------------------------------|--------------------------|----------|----------------|
| 1      |                | 37.093     | 16733976.98                           | 143785.84                | 50.39    | 50.39          |
| 2      |                | 48.672     | 16474158.60                           | 164645.38                | 49.61    | 49.61          |
|        |                |            | 33208135.58                           | 308431.22                | 100.00   | 100.00         |

**HPLC graph of compound ( $\pm$ )-19**

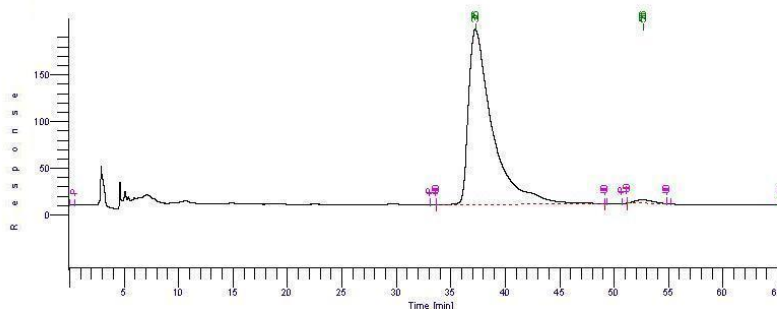

cellulose-2 , chiral

| Peak # | Component Name | Time [min] | Area [ $\mu\text{V}\cdot\text{sec}$ ] | Height [ $\mu\text{V}$ ] | Area [%] | Norm. Area [%] |
|--------|----------------|------------|---------------------------------------|--------------------------|----------|----------------|
| 1      |                | 37.258     | 28589734.77                           | 187597.01                | 98.54    | 98.54          |
| 2      |                | 52.657     | 424982.19                             | 3771.33                  | 1.46     | 1.46           |
|        |                |            | 29014716.96                           | 191368.34                | 100.00   | 100.00         |

**HPLC graph of compound (-)-19 (enantio enriched)**

### CD spectras of Compound (+)-19 and (-)-19

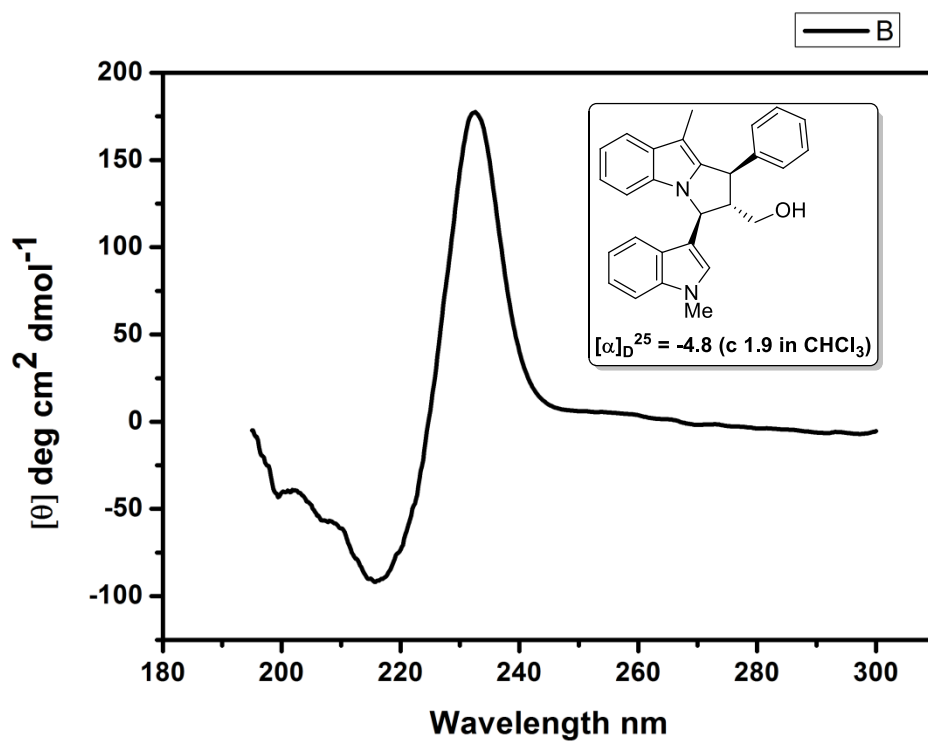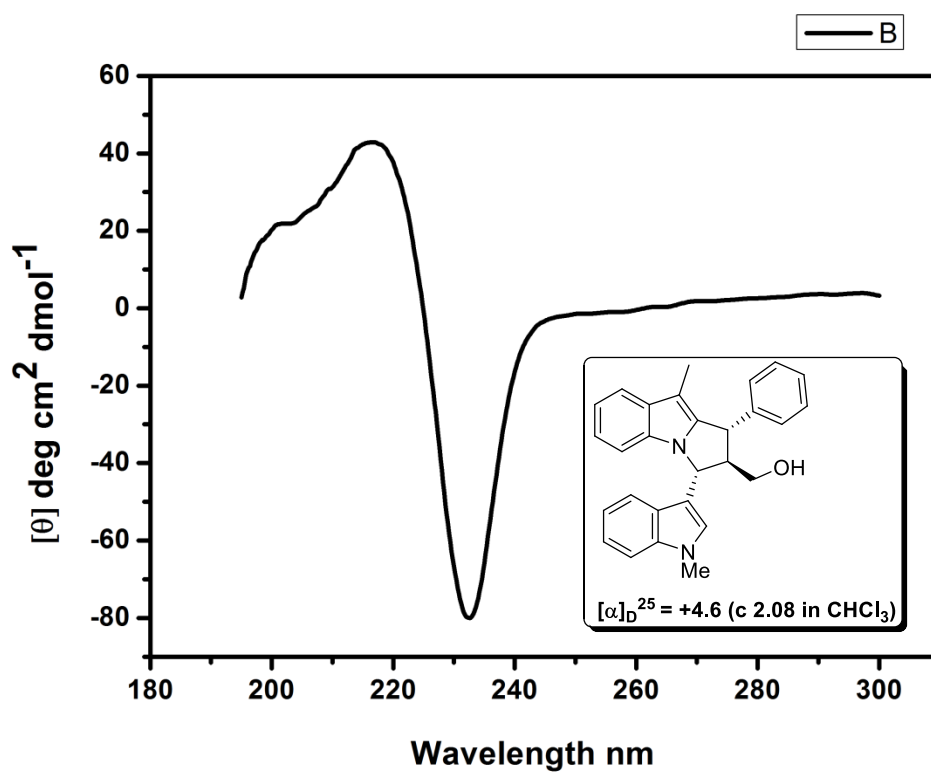

## Crystal data and structure refinement for compound 8e

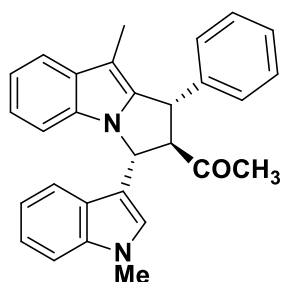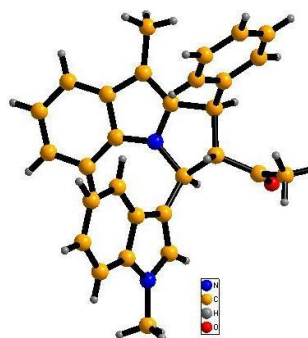

|                                                                            |                                                           |
|----------------------------------------------------------------------------|-----------------------------------------------------------|
| Chemical formula                                                           | C <sub>29</sub> H <sub>26</sub> N <sub>2</sub> O          |
| $M_r$                                                                      | 418.52                                                    |
| Crystal system, space group                                                | Triclinic, P-1                                            |
| Temperature (K)                                                            | 100                                                       |
| $a, b, c$ (Å)                                                              | 9.500 (5), 11.269 (5), 12.113 (6)                         |
| $\alpha, \beta, \gamma$ (°)                                                | 111.974 (7), 97.280 (8), 101.443 (7)                      |
| $V$ (Å <sup>3</sup> )                                                      | 1149.5 (10)                                               |
| $Z$                                                                        | 2                                                         |
| Radiation type                                                             | Mo $K\alpha$                                              |
| $\mu$ (mm <sup>-1</sup> )                                                  | 0.07                                                      |
| Crystal size (mm)                                                          | 0.16 × 0.14 × 0.11                                        |
| Data collection                                                            |                                                           |
| Diffractometer                                                             | Bruker <i>SMART APEX</i> diffractometer                   |
| Absorption correction                                                      | Empirical (using intensity measurements)<br><i>SADABS</i> |
| $T_{\min}, T_{\max}$                                                       | 0.928, 0.992                                              |
| No. of measured, independent and observed [ $I > 2\sigma(I)$ ] reflections | 6059, 4117, 2535                                          |
| $R_{\text{int}}$                                                           | 0.018                                                     |
| $(\sin \theta/\lambda)_{\text{max}}$ (Å <sup>-1</sup> )                    | 0.600                                                     |
| Refinement                                                                 |                                                           |
| $R[F^2 > 2\sigma(F^2)], wR(F^2), S$                                        | 0.055, 0.204, 0.89                                        |
| No. of reflections                                                         | 4117                                                      |
| No. of parameters                                                          | 292                                                       |
| H-atom treatment                                                           | H-atom parameters constrained                             |
| $\Delta\rho_{\text{max}}, \Delta\rho_{\text{min}}$ (e Å <sup>-3</sup> )    | 0.21, -0.19                                               |

## Compound 8e'

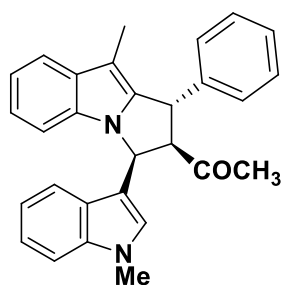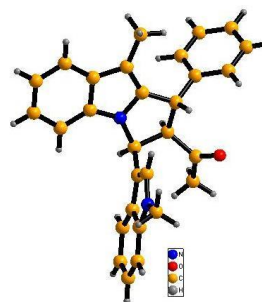

|                                                                            |                                                           |
|----------------------------------------------------------------------------|-----------------------------------------------------------|
| Chemical formula                                                           | C <sub>29</sub> H <sub>26</sub> N <sub>2</sub> O          |
| $M_r$                                                                      | 418.52                                                    |
| Crystal system, space group                                                | Triclinic, P -1                                           |
| Temperature (K)                                                            | 100                                                       |
| $a, b, c$ (Å)                                                              | 9.752 (14), 11.395 (16), 12.462 (17)                      |
| $\alpha, \beta, \gamma$ (°)                                                | 105.79 (3), 107.47 (2), 99.95 (2)                         |
| $V$ (Å <sup>3</sup> )                                                      | 1221 (3)                                                  |
| $Z$                                                                        | 2                                                         |
| Radiation type                                                             | Mo $K\alpha$                                              |
| $\mu$ (mm <sup>-1</sup> )                                                  | 0.07                                                      |
| Crystal size (mm)                                                          | 0.12 × 0.11 × 0.10                                        |
| Data collection                                                            |                                                           |
| Diffractometer                                                             | Bruker <i>SMART APEX</i> diffractometer                   |
| Absorption correction                                                      | Empirical (using intensity measurements)<br><i>SADABS</i> |
| $T_{\min}, T_{\max}$                                                       | 0.992, 0.993                                              |
| No. of measured, independent and observed [ $I > 2\sigma(I)$ ] reflections | 6439, 4379, 1961                                          |
| $R_{\text{int}}$                                                           | 0.031                                                     |
| $(\sin \theta/\lambda)_{\text{max}}$ (Å <sup>-1</sup> )                    | 0.600                                                     |
| Refinement                                                                 |                                                           |
| $R[F^2 > 2\sigma(F^2)], wR(F^2), S$                                        | 0.069, 0.230, 0.84                                        |
| No. of reflections                                                         | 4379                                                      |
| No. of parameters                                                          | 292                                                       |
| H-atom treatment                                                           | H-atom parameters constrained                             |
| $\Delta\rho_{\text{max}}, \Delta\rho_{\text{min}}$ (e Å <sup>-3</sup> )    | 0.25, -0.21                                               |

## Compound 10d

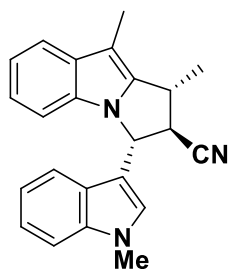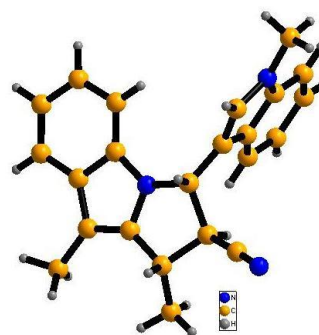

|                                                                                                                |                                                                        |
|----------------------------------------------------------------------------------------------------------------|------------------------------------------------------------------------|
| Chemical formula                                                                                               | C <sub>23</sub> H <sub>21</sub> N <sub>3</sub>                         |
| <i>M<sub>r</sub></i>                                                                                           | 339.43                                                                 |
| Crystal system, space group                                                                                    | Monoclinic, C 2/c                                                      |
| Temperature (K)                                                                                                | 100                                                                    |
| <i>a</i> , <i>b</i> , <i>c</i> (Å)                                                                             | 19.869 (9), 8.329 (3), 23.300 (9)                                      |
| β (°)                                                                                                          | 110.432 (12)                                                           |
| <i>V</i> (Å <sup>3</sup> )                                                                                     | 3613 (2)                                                               |
| <i>Z</i>                                                                                                       | 8                                                                      |
| Radiation type                                                                                                 | Mo <i>K</i> α                                                          |
| μ (mm <sup>-1</sup> )                                                                                          | 0.07                                                                   |
| Crystal size (mm)                                                                                              | 0.15 × 0.13 × 0.12                                                     |
| Data collection                                                                                                |                                                                        |
| Diffractometer                                                                                                 | Bruker <i>SMART APEX</i> diffractometer                                |
| Absorption correction                                                                                          | Empirical (using intensity measurements)<br><i>SADABS</i>              |
| <i>T<sub>min</sub></i> , <i>T<sub>max</sub></i>                                                                | 0.989, 0.991                                                           |
| No. of measured, independent and observed [ <i>I</i> > 2σ( <i>I</i> )] reflections                             | 9601, 3345, 2361                                                       |
| <i>R<sub>int</sub></i>                                                                                         | 0.049                                                                  |
| (sin θ/λ) <sub>max</sub> (Å <sup>-1</sup> )                                                                    | 0.606                                                                  |
| Refinement                                                                                                     |                                                                        |
| <i>R</i> [ <i>F</i> <sup>2</sup> > 2σ( <i>F</i> <sup>2</sup> )], <i>wR</i> ( <i>F</i> <sup>2</sup> ), <i>S</i> | 0.064, 0.195, 1.04                                                     |
| No. of reflections                                                                                             | 3345                                                                   |
| No. of parameters                                                                                              | 247                                                                    |
| H-atom treatment                                                                                               | H atoms treated by a mixture of independent and constrained refinement |
| Δρ <sub>max</sub> , Δρ <sub>min</sub> (e Å <sup>-3</sup> )                                                     | 0.53, -0.52                                                            |

## Compound 10b'

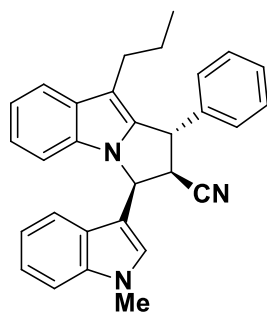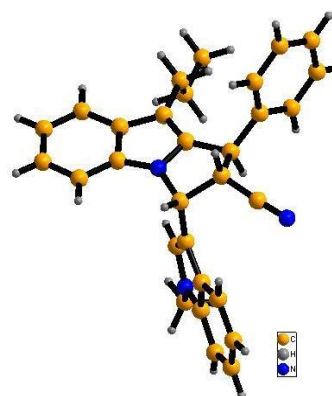

|                                                                            |                                                                        |
|----------------------------------------------------------------------------|------------------------------------------------------------------------|
| Chemical formula                                                           | C <sub>30</sub> H <sub>27</sub> N <sub>3</sub>                         |
| $M_r$                                                                      | 429.55                                                                 |
| Crystal system, space group                                                | Orthorhombic, <i>Pbca</i>                                              |
| Temperature (K)                                                            | 100                                                                    |
| $a, b, c$ (Å)                                                              | 9.0981 (18), 20.673 (4), 24.866 (5)                                    |
| $V$ (Å <sup>3</sup> )                                                      | 4677.0 (16)                                                            |
| $Z$                                                                        | 8                                                                      |
| Radiation type                                                             | Mo $K\alpha$                                                           |
| $\mu$ (mm <sup>-1</sup> )                                                  | 0.07                                                                   |
| Crystal size (mm)                                                          | 0.12 × 0.11 × 0.10                                                     |
| Data collection                                                            |                                                                        |
| Diffractometer                                                             | Bruker <i>SMART APEX</i> diffractometer                                |
| Absorption correction                                                      | Empirical (using intensity measurements)<br><i>SADABS</i>              |
| $T_{\min}, T_{\max}$                                                       | 0.992, 0.993                                                           |
| No. of measured, independent and observed [ $I > 2\sigma(I)$ ] reflections | 25350, 4589, 2978                                                      |
| $R_{\text{int}}$                                                           | 0.080                                                                  |
| $(\sin \theta/\lambda)_{\text{max}}$ (Å <sup>-1</sup> )                    | 0.617                                                                  |
| Refinement                                                                 |                                                                        |
| $R[F^2 > 2\sigma(F^2)], wR(F^2), S$                                        | 0.051, 0.150, 1.02                                                     |
| No. of reflections                                                         | 4589                                                                   |
| No. of parameters                                                          | 300                                                                    |
| H-atom treatment                                                           | H atoms treated by a mixture of independent and constrained refinement |
| $\Delta\rho_{\text{max}}, \Delta\rho_{\text{min}}$ (e Å <sup>-3</sup> )    | 0.24, -0.26                                                            |

## Compound 12d

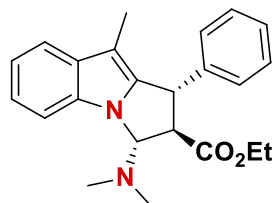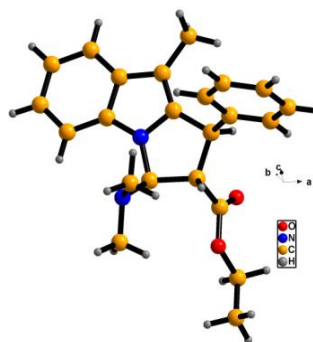

|                                                                            |                                                                        |
|----------------------------------------------------------------------------|------------------------------------------------------------------------|
| Chemical formula                                                           | C <sub>23</sub> H <sub>26</sub> N <sub>2</sub> O <sub>2</sub>          |
| $M_r$                                                                      | 362.47                                                                 |
| Crystal system, space group                                                | Triclinic, P -1                                                        |
| Temperature (K)                                                            | 100                                                                    |
| $a, b, c$ (Å)                                                              | 7.845 (5), 9.525 (3), 14.475 (5)                                       |
| $\alpha, \beta, \gamma$ (°)                                                | 102.857 (5), 103.298 (2), 104.067 (5)                                  |
| $V$ (Å <sup>3</sup> )                                                      | 975.6 (9)                                                              |
| $Z$                                                                        | 2                                                                      |
| Radiation type                                                             | Mo $K\alpha$                                                           |
| $\mu$ (mm <sup>-1</sup> )                                                  | 0.08                                                                   |
| Crystal size (mm)                                                          | 0.12 × 0.11 × 0.10                                                     |
| Data collection                                                            |                                                                        |
| Diffractometer                                                             | Bruker <i>SMART APEX</i> diffractometer                                |
| Absorption correction                                                      | Empirical (using intensity measurements)<br><i>SADABS</i>              |
| $T_{\min}, T_{\max}$                                                       | 0.991, 0.992                                                           |
| No. of measured, independent and observed [ $I > 2\sigma(I)$ ] reflections | 12331, 3643, 2696                                                      |
| $R_{\text{int}}$                                                           | 0.041                                                                  |
| $(\sin \theta/\lambda)_{\text{max}}$ (Å <sup>-1</sup> )                    | 0.606                                                                  |
| Refinement                                                                 |                                                                        |
| $R[F^2 > 2\sigma(F^2)], wR(F^2), S$                                        | 0.057, 0.168, 1.07                                                     |
| No. of reflections                                                         | 3643                                                                   |
| No. of parameters                                                          | 244                                                                    |
| H-atom treatment                                                           | H atoms treated by a mixture of independent and constrained refinement |
| $\Delta\rho_{\text{max}}, \Delta\rho_{\text{min}}$ (e Å <sup>-3</sup> )    | 0.60, -0.48                                                            |



## Compound 16h

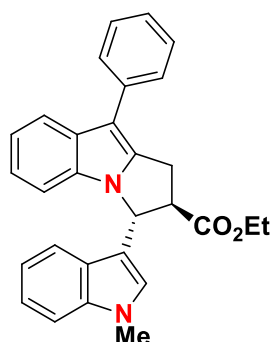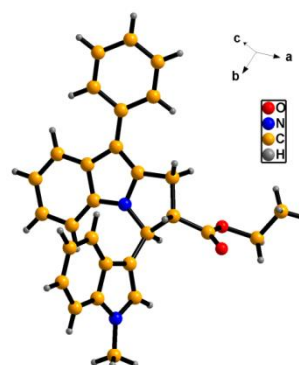

|                                                                            |                                                                        |
|----------------------------------------------------------------------------|------------------------------------------------------------------------|
| Chemical formula                                                           | C <sub>29</sub> H <sub>26</sub> N <sub>2</sub> O <sub>2</sub>          |
| $M_r$                                                                      | 434.52                                                                 |
| Crystal system, space group                                                | Triclinic, P -1                                                        |
| Temperature (K)                                                            | 100                                                                    |
| $a, b, c$ (Å)                                                              | 9.929 (4), 10.675 (4), 12.143 (4)                                      |
| $\alpha, \beta, \gamma$ (°)                                                | 90.655 (7), 113.506 (6), 109.344 (6)                                   |
| $V$ (Å <sup>3</sup> )                                                      | 1098.2 (7)                                                             |
| $Z$                                                                        | 2                                                                      |
| Radiation type                                                             | Mo $K\alpha$                                                           |
| $\mu$ (mm <sup>-1</sup> )                                                  | 0.08                                                                   |
| Crystal size (mm)                                                          | 0.20 × 0.20 × 0.17                                                     |
| Data collection                                                            |                                                                        |
| Diffractometer                                                             | Bruker <i>SMART APEX</i> diffractometer                                |
| Absorption correction                                                      | Empirical (using intensity measurements)<br><i>SADABS</i>              |
| $T_{\min}, T_{\max}$                                                       | 0.984, 0.986                                                           |
| No. of measured, independent and observed [ $I > 2\sigma(I)$ ] reflections | 5750, 3823, 3016                                                       |
| $R_{\text{int}}$                                                           | 0.023                                                                  |
| $(\sin \theta/\lambda)_{\text{max}}$ (Å <sup>-1</sup> )                    | 0.595                                                                  |
| Refinement                                                                 |                                                                        |
| $R[F^2 > 2\sigma(F^2)], wR(F^2), S$                                        | 0.051, 0.150, 1.09                                                     |
| No. of reflections                                                         | 3823                                                                   |
| No. of parameters                                                          | 300                                                                    |
| H-atom treatment                                                           | H atoms treated by a mixture of independent and constrained refinement |
| $\Delta\rho_{\text{max}}, \Delta\rho_{\text{min}}$ (e Å <sup>-3</sup> )    | 0.23, -0.29                                                            |

## Compound 18c

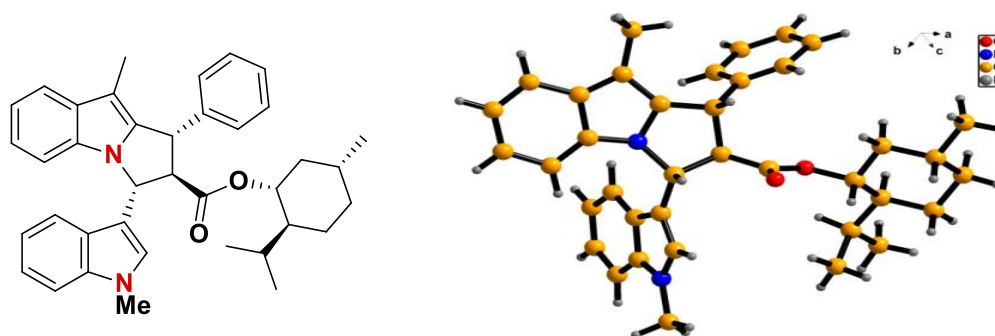

|                                                                                                                |                                                                                      |
|----------------------------------------------------------------------------------------------------------------|--------------------------------------------------------------------------------------|
| Chemical formula                                                                                               | C <sub>38</sub> H <sub>42</sub> N <sub>2</sub> O <sub>2</sub>                        |
| <i>M<sub>r</sub></i>                                                                                           | 558.74                                                                               |
| Crystal system, space group                                                                                    | Monoclinic, P 21                                                                     |
| Temperature (K)                                                                                                | 100                                                                                  |
| <i>a</i> , <i>b</i> , <i>c</i> (Å)                                                                             | 10.5253 (7), 19.4986 (12), 15.3673 (10)                                              |
| β (°)                                                                                                          | 90.034 (2)                                                                           |
| <i>V</i> (Å <sup>3</sup> )                                                                                     | 3153.8 (4)                                                                           |
| <i>Z</i>                                                                                                       | 4                                                                                    |
| Radiation type                                                                                                 | Mo <i>K</i> α                                                                        |
| μ (mm <sup>-1</sup> )                                                                                          | 0.07                                                                                 |
| Crystal size (mm)                                                                                              | 0.25 × 0.23 × 0.21                                                                   |
| Data collection                                                                                                |                                                                                      |
| Diffractometer                                                                                                 | Bruker <i>SMART APEX</i> diffractometer                                              |
| Absorption correction                                                                                          | Empirical (using intensity measurements)<br><i>SADABS</i>                            |
| <i>T<sub>min</sub></i> , <i>T<sub>max</sub></i>                                                                | 0.982, 0.985                                                                         |
| No. of measured, independent and observed [ <i>I</i> > 2σ( <i>I</i> )] reflections                             | 20849, 10249, 8489                                                                   |
| <i>R<sub>int</sub></i>                                                                                         | 0.098                                                                                |
| (sin θ/λ) <sub>max</sub> (Å <sup>-1</sup> )                                                                    | 0.588                                                                                |
| Refinement                                                                                                     |                                                                                      |
| <i>R</i> [ <i>F</i> <sup>2</sup> > 2σ( <i>F</i> <sup>2</sup> )], <i>wR</i> ( <i>F</i> <sup>2</sup> ), <i>S</i> | 0.137, 0.331, 1.08                                                                   |
| No. of reflections                                                                                             | 10249                                                                                |
| No. of parameters                                                                                              | 752                                                                                  |
| No. of restraints                                                                                              | 1                                                                                    |
| H-atom treatment                                                                                               | H-atom parameters constrained                                                        |
|                                                                                                                | $w = 1/[\sigma^2(F_o^2) + (0.0731P)^2 + 27.3416P]$<br>where $P = (F_o^2 + 2F_c^2)/3$ |
| Δρ <sub>max</sub> , Δρ <sub>min</sub> (e Å <sup>-3</sup> )                                                     | 0.53, -0.41                                                                          |
| Absolute structure                                                                                             | Flack H D (1983), Acta Cryst. A39, 876-881                                           |
| Absolute structure parameter                                                                                   | 2 (4)                                                                                |

# <sup>1</sup>H and <sup>13</sup>C NMR of compound 4b

BR1693-4-4.esp

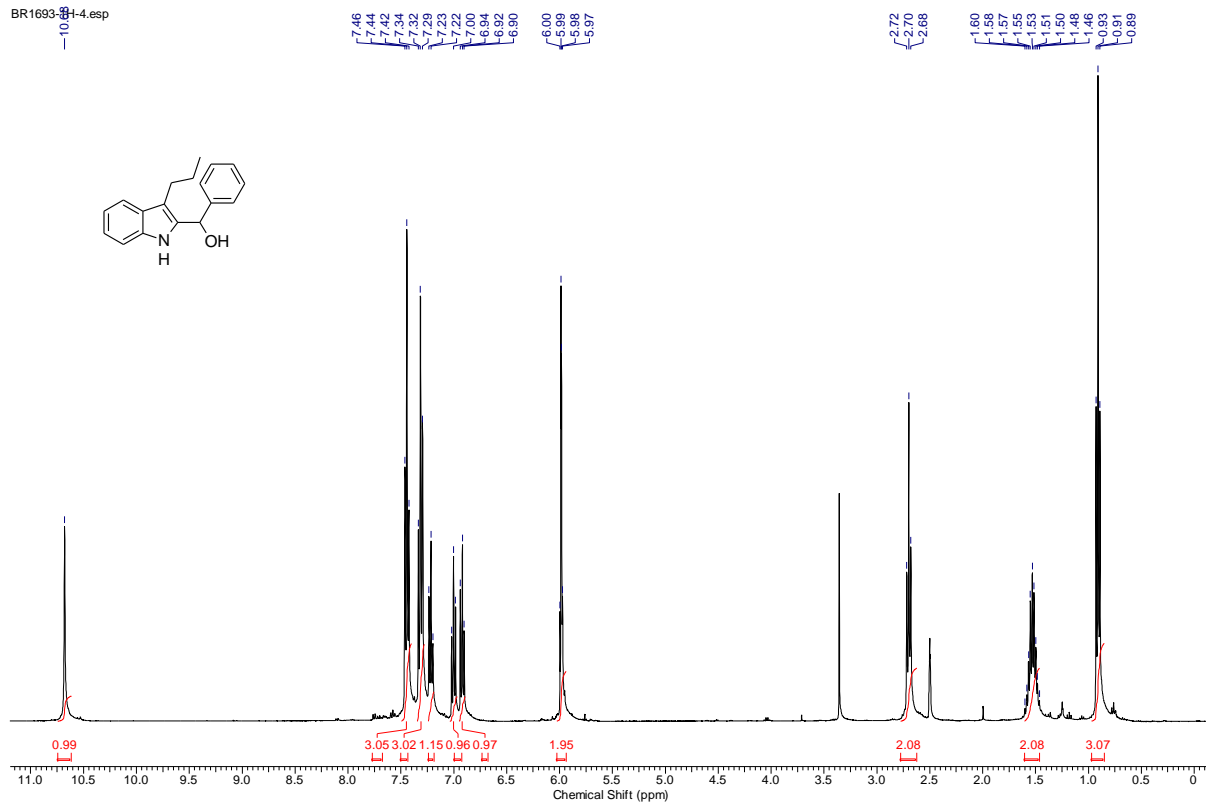

BR1693-13C-4.esp

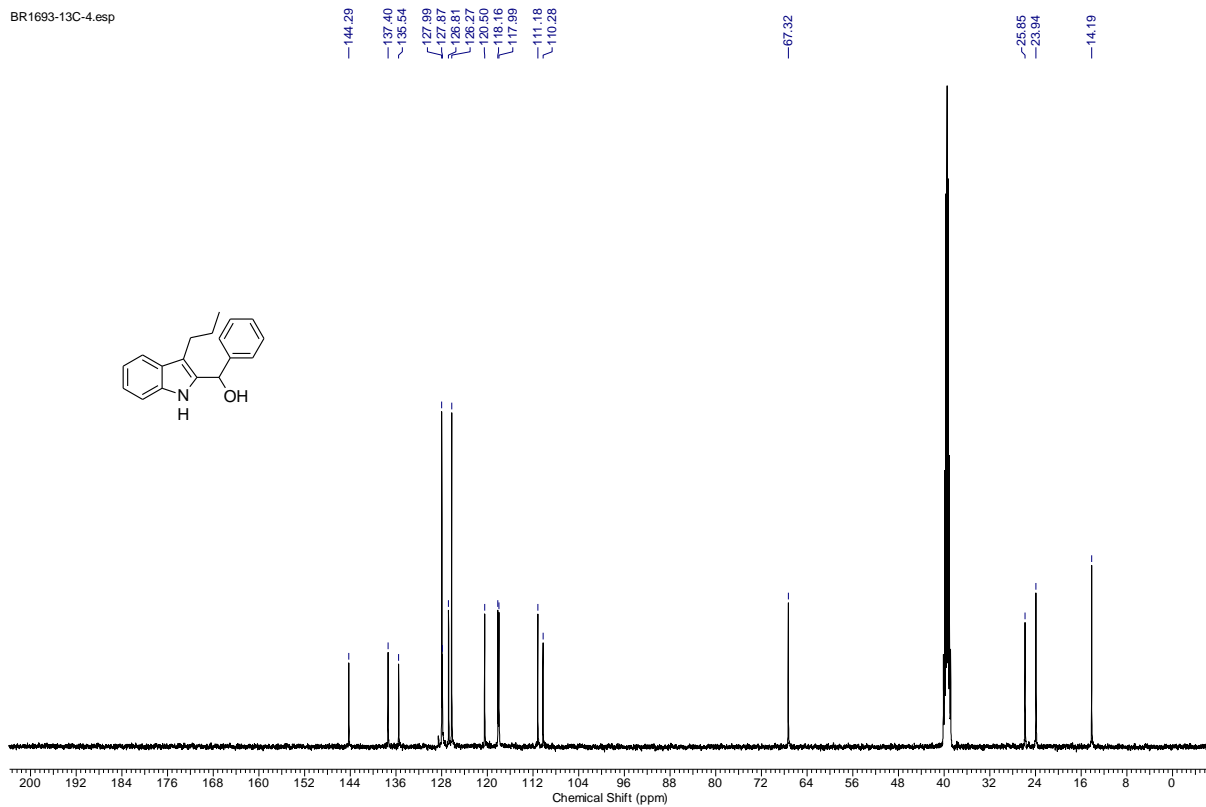

# <sup>1</sup>H and <sup>13</sup>C NMR of compound 4c

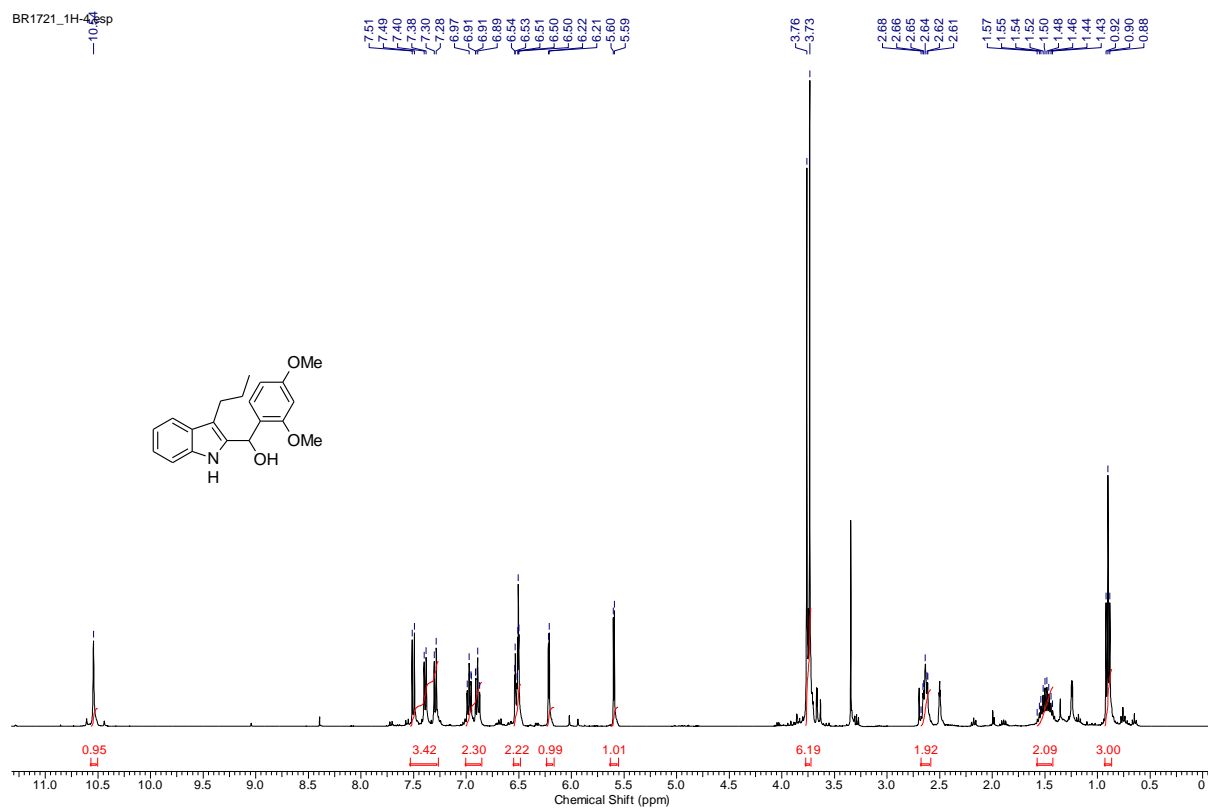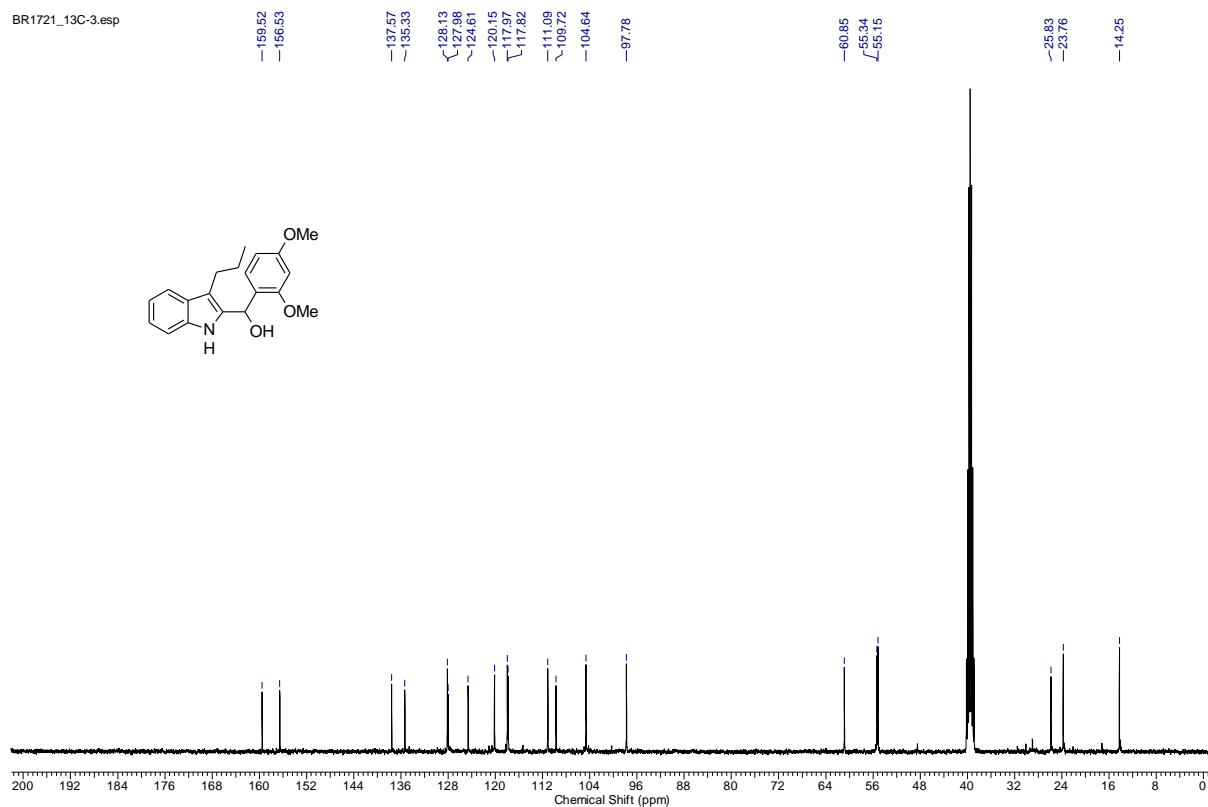

# <sup>1</sup>H and <sup>13</sup>C NMR of compound 4f

BR1720\_1h.esp

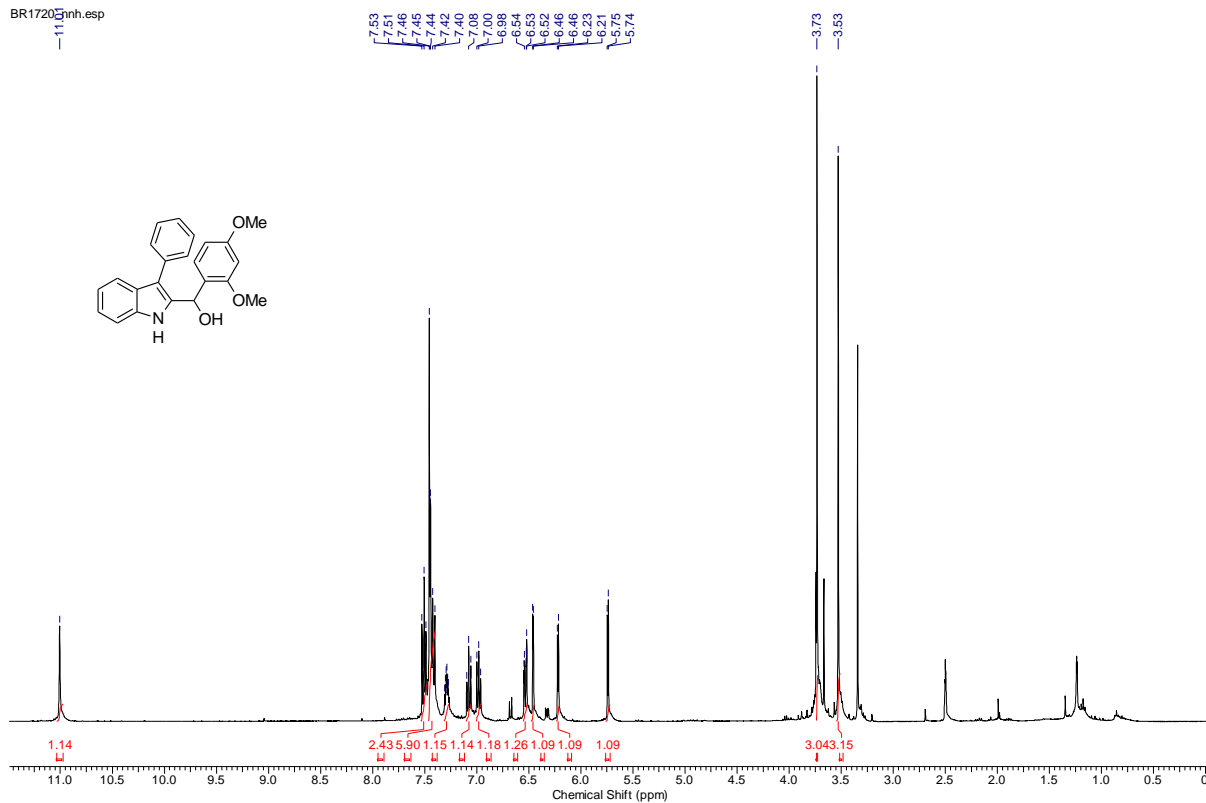

BR1720\_13C-3.esp

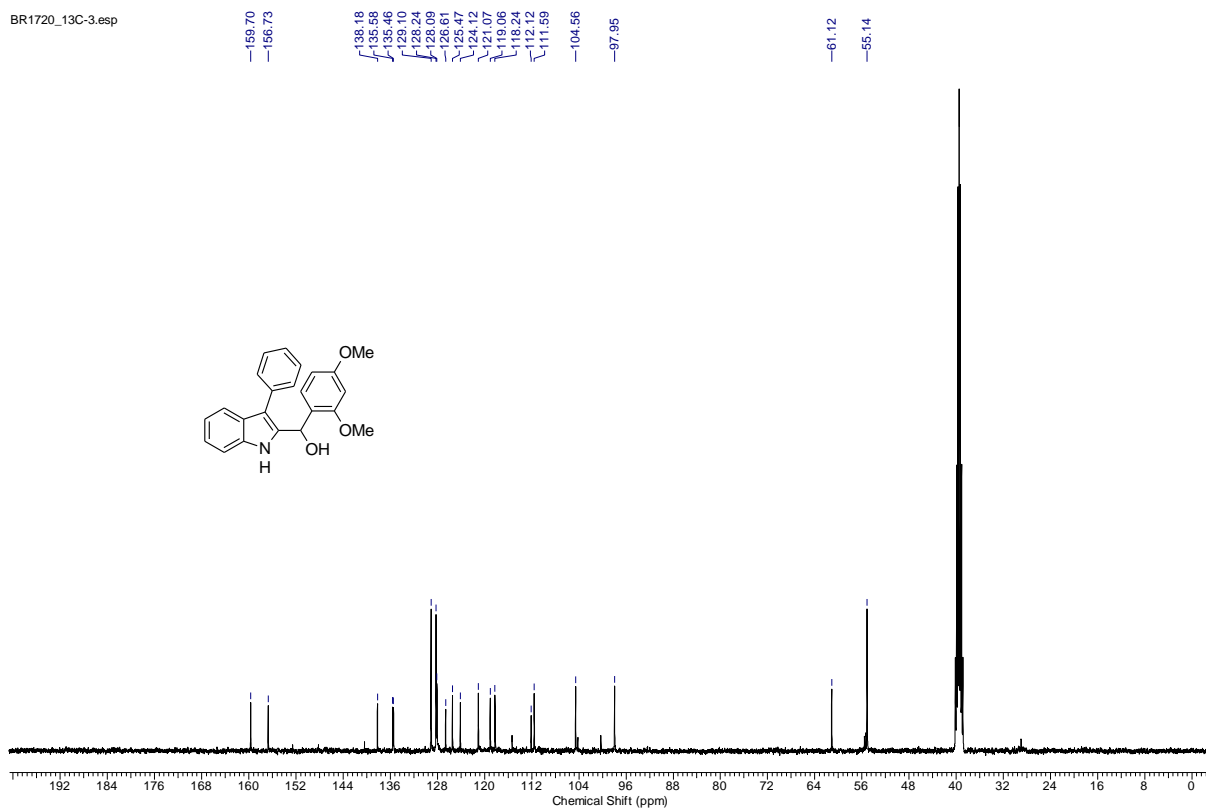

# $^1\text{H}$ and $^{13}\text{C}$ NMR of compound 4g

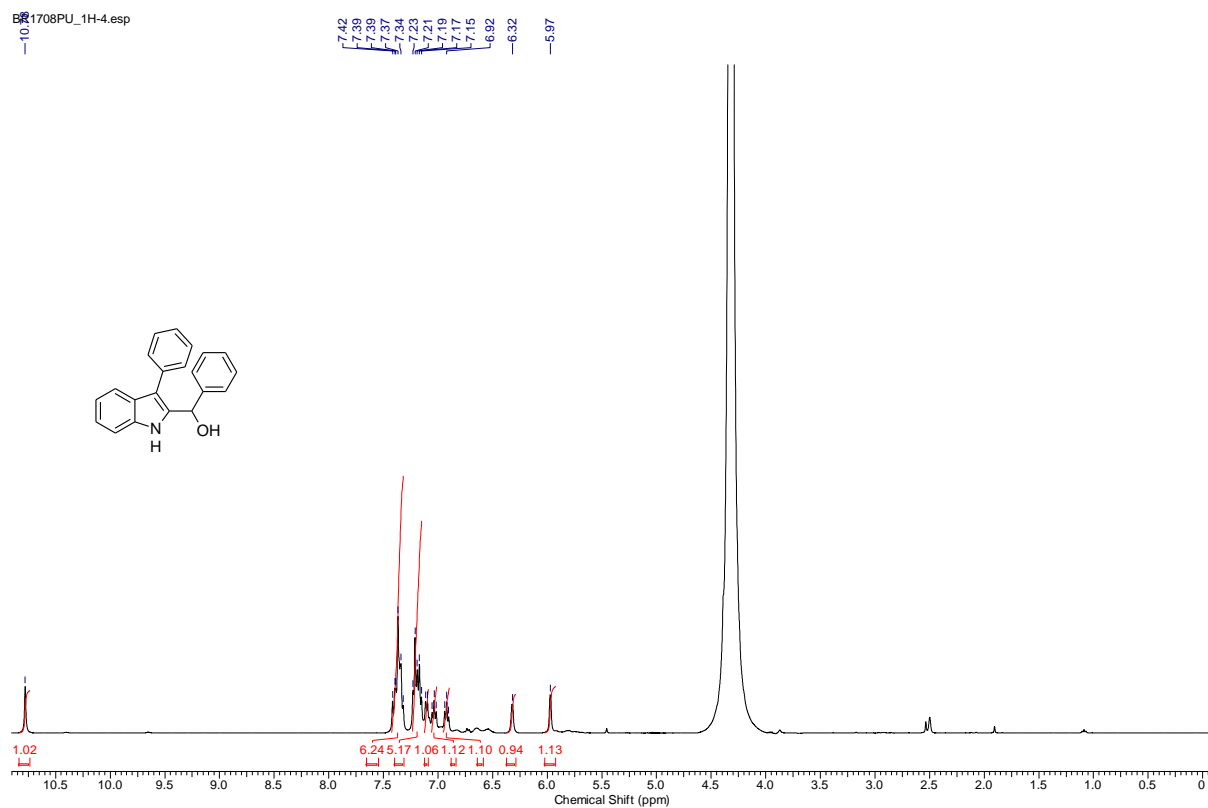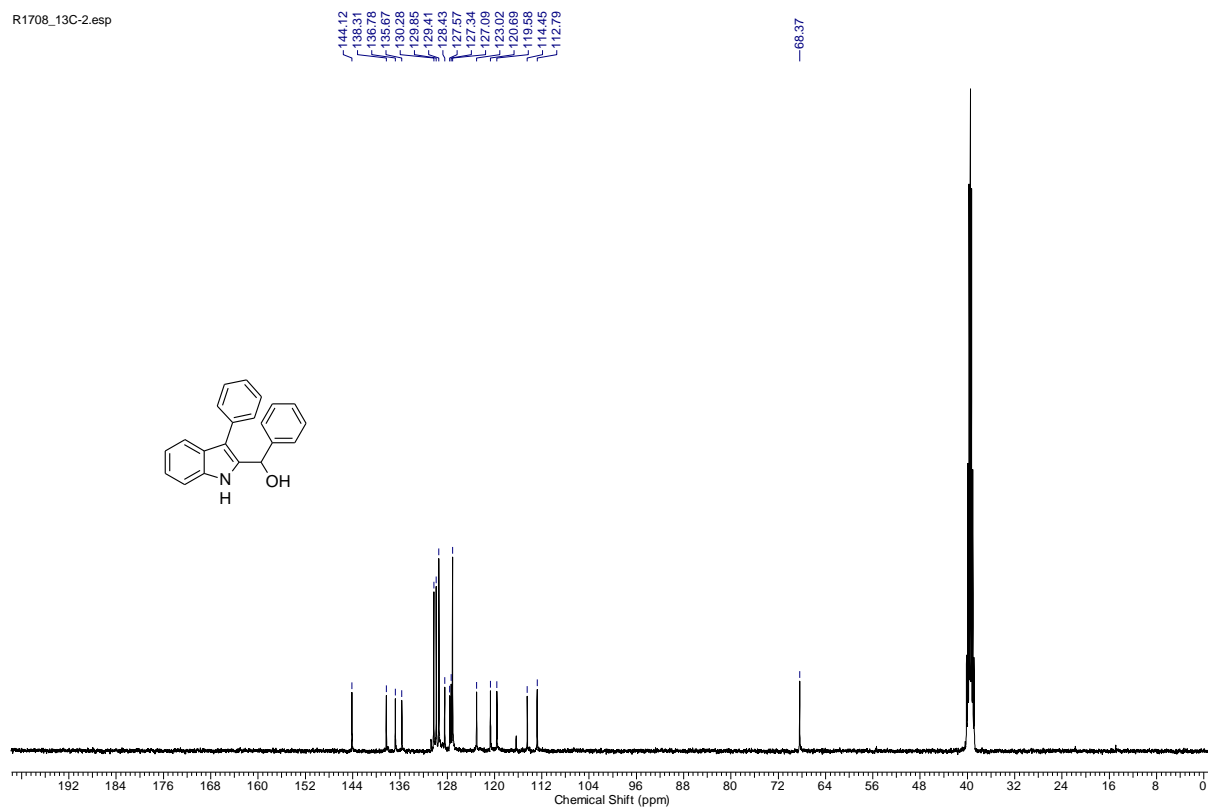

# <sup>1</sup>H and <sup>13</sup>C NMR of compound 6a

BR1256\_PROTON-4.esp

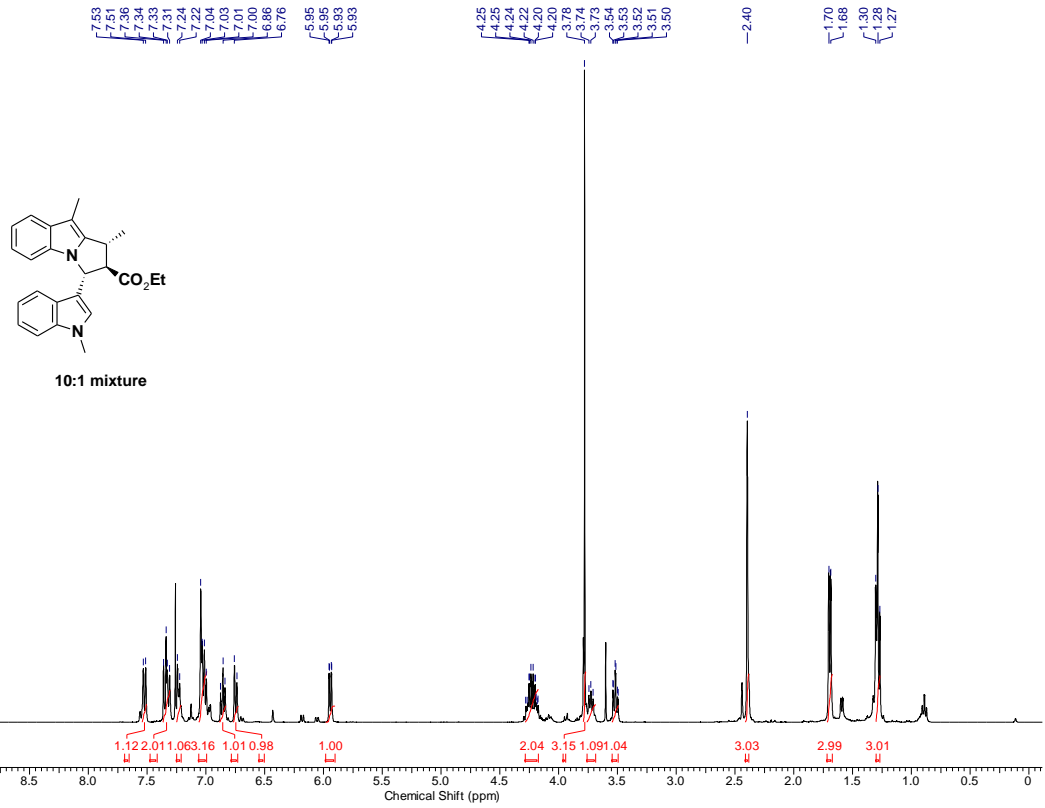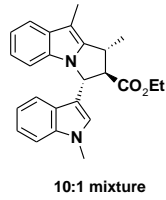

BR1256PU\_13C-1.esp

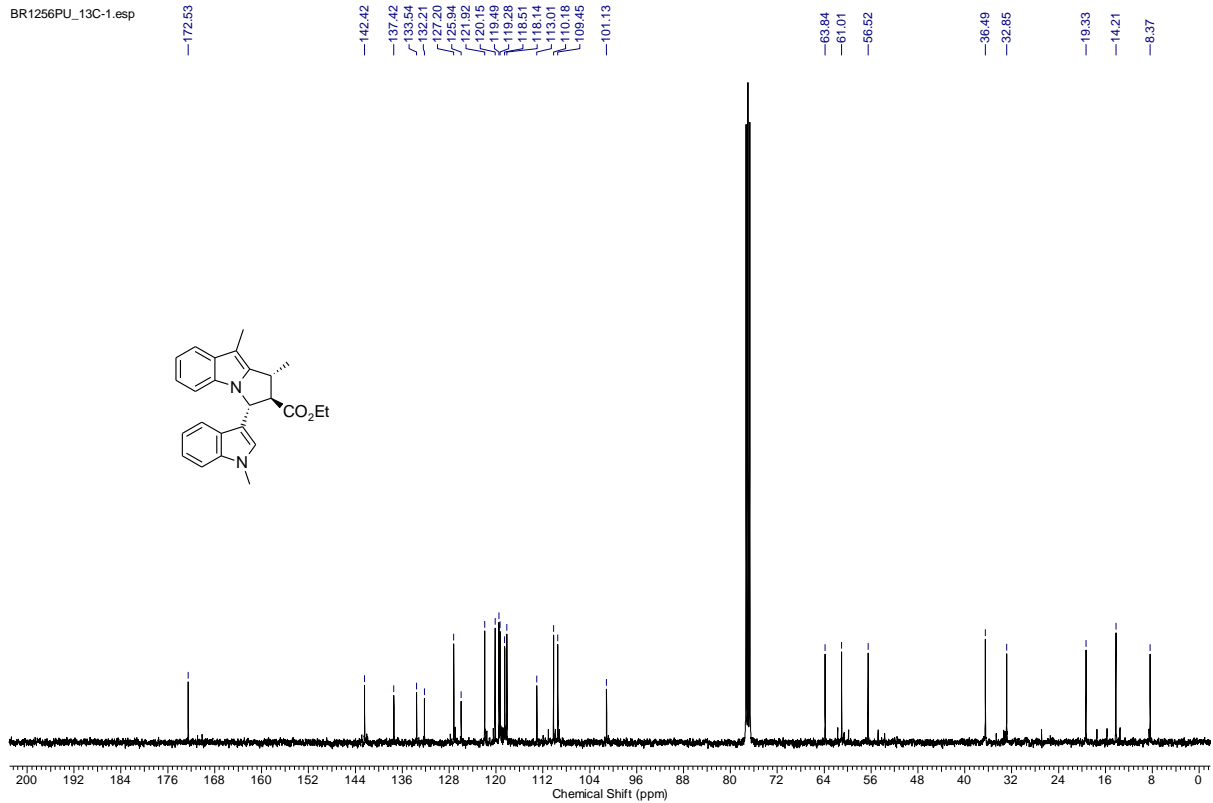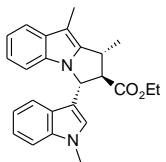

# <sup>1</sup>H and <sup>13</sup>C NMR of compound 6b

BR1257\_PROTON-4.esp

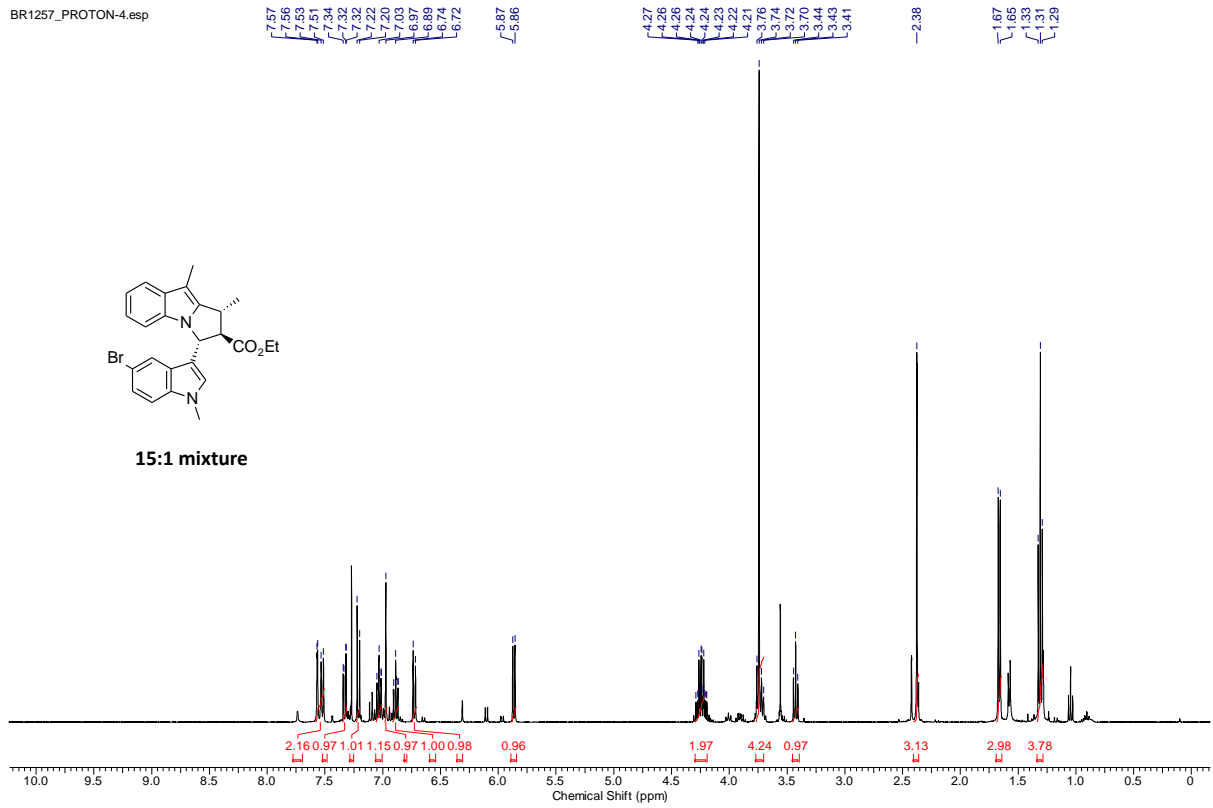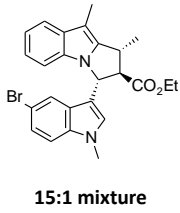

BR1257\_13C-1.esp

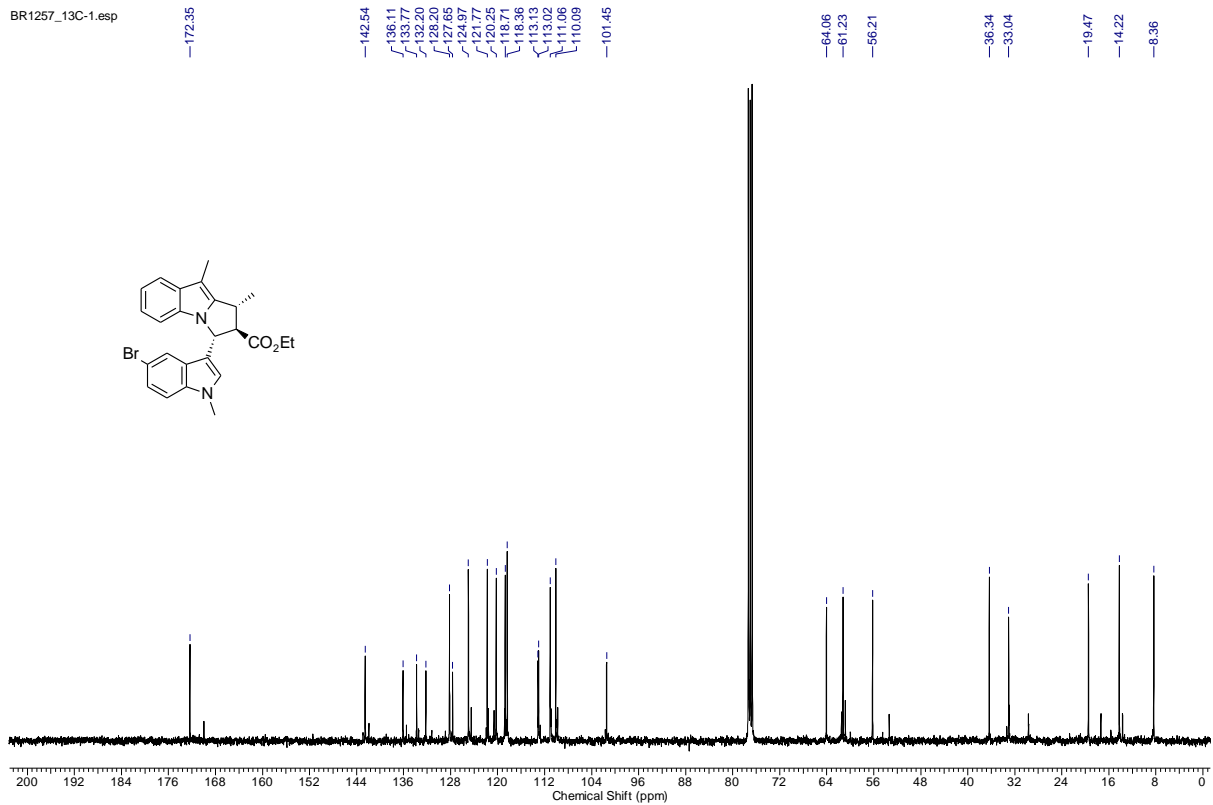



# $^1\text{H}$ and $^{13}\text{C}$ NMR of compound 8a

BR1697TOP-1H-2.esp

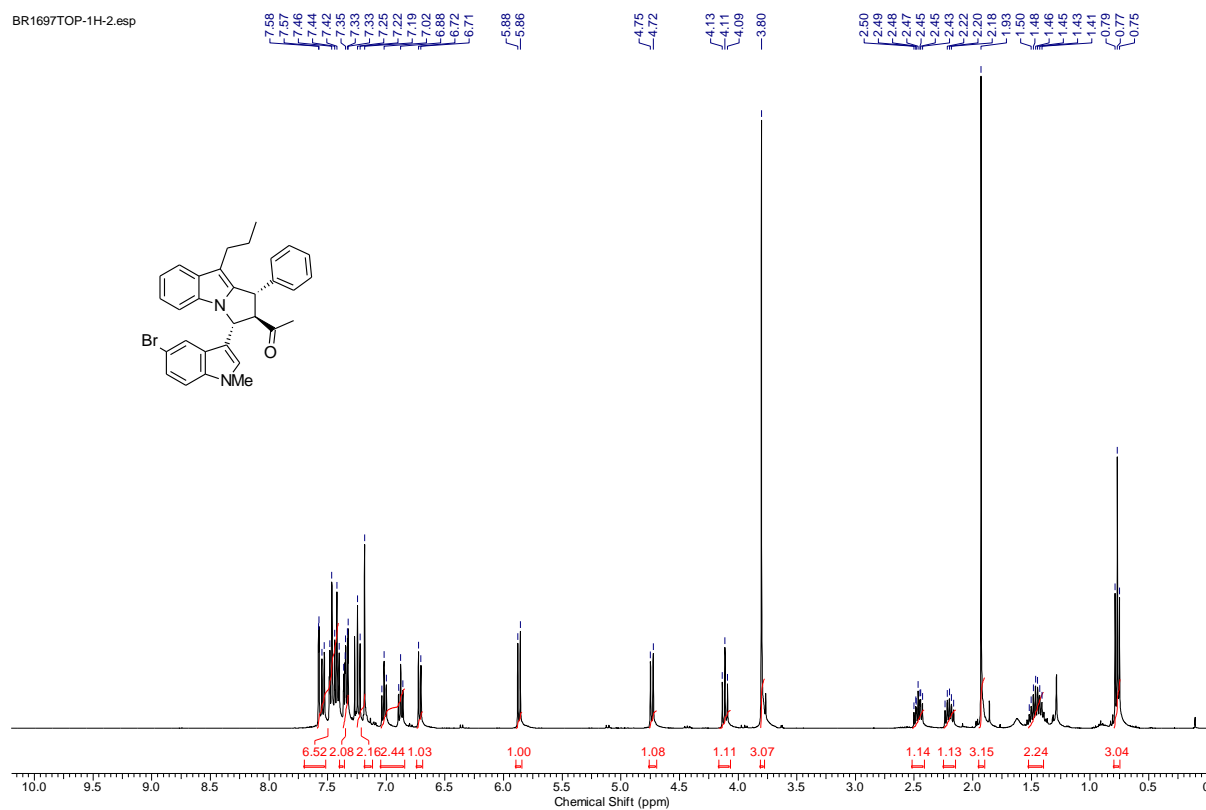

BR1697TOP-13C-2.esp

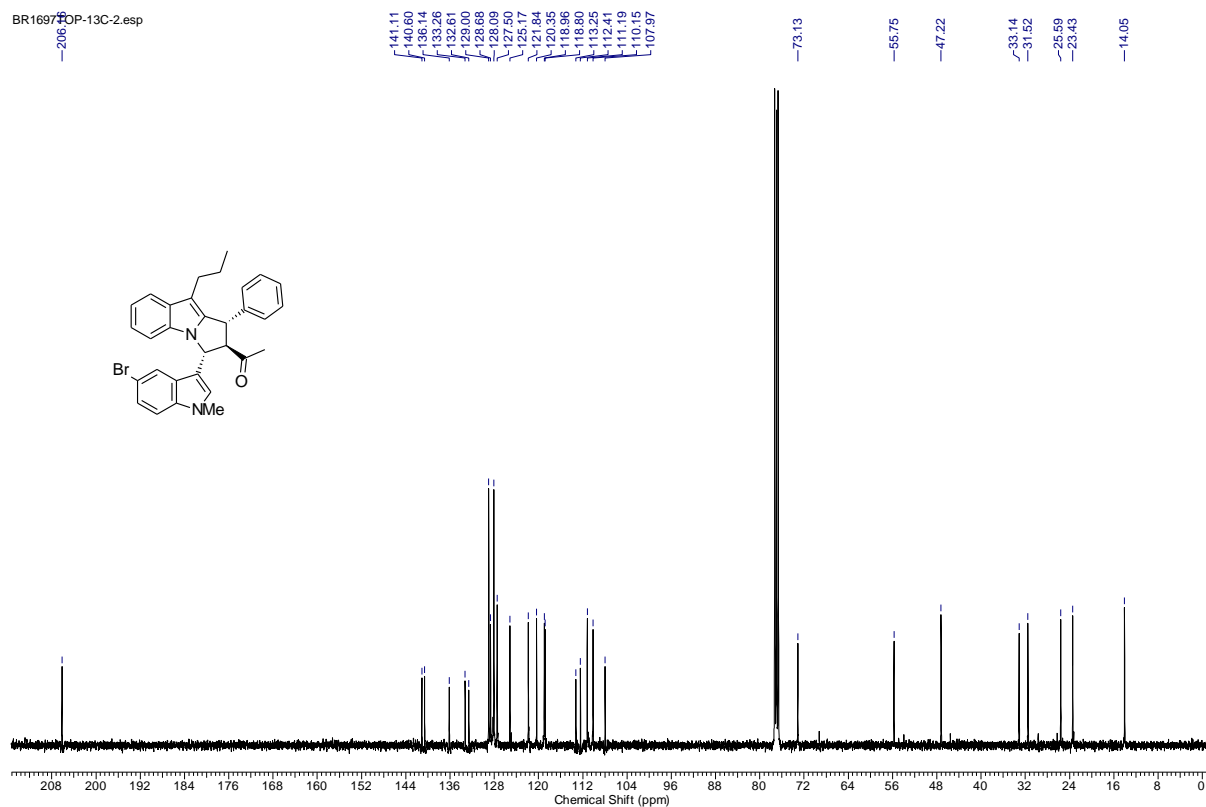

# <sup>1</sup>H and <sup>13</sup>C NMR of compound 8a'

BR1697BEL-1H-2.esp

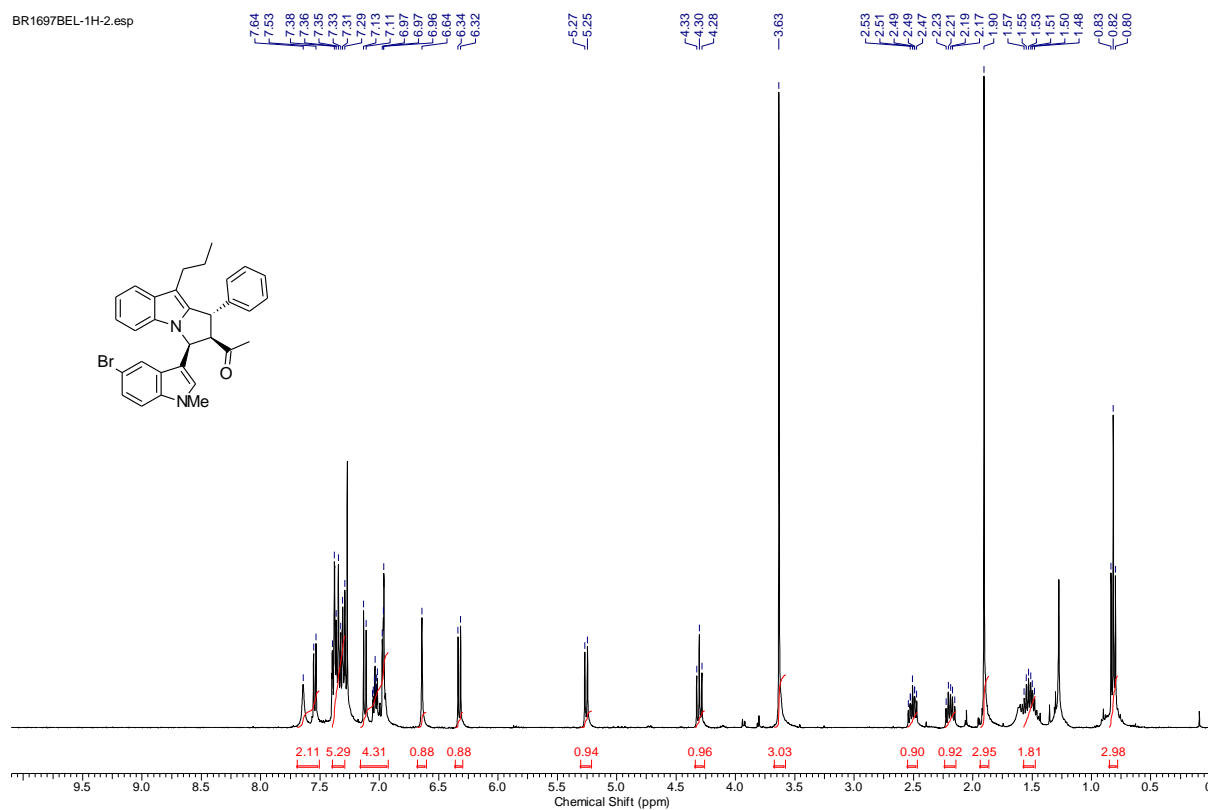

BR1697BE13C-2.esp

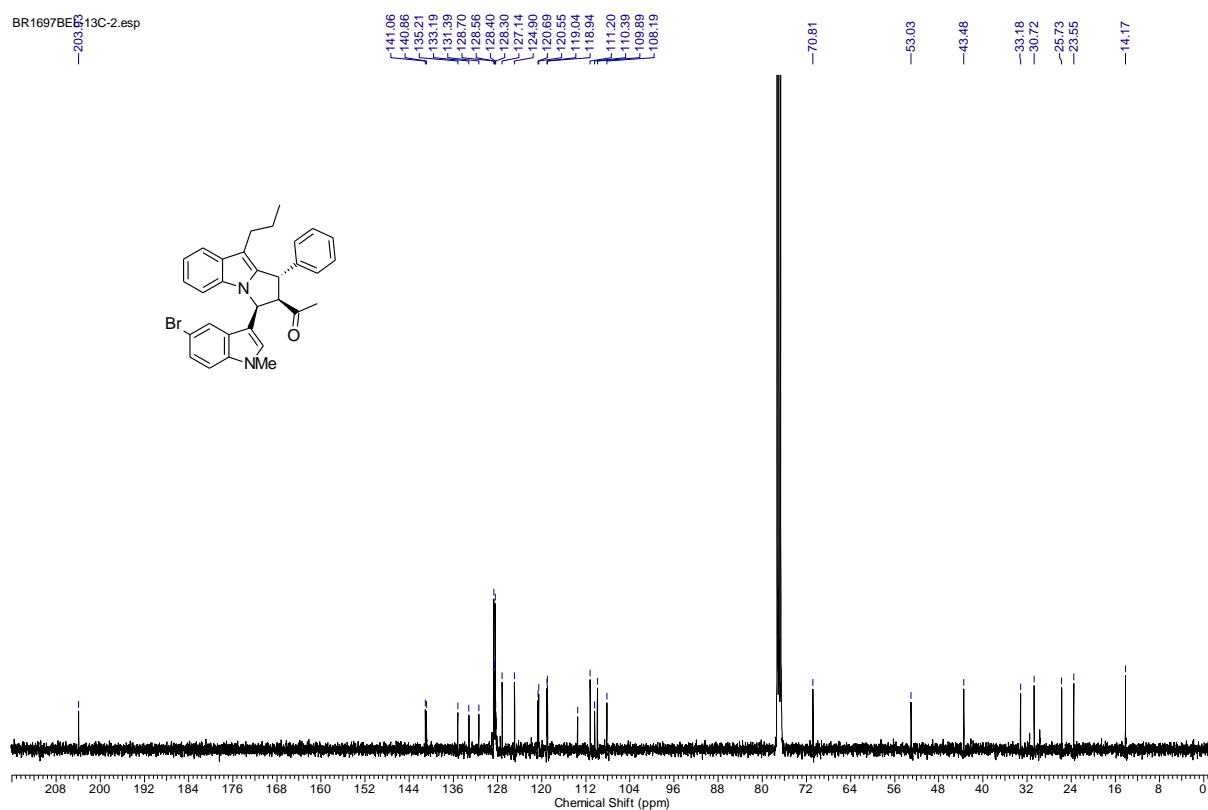

# <sup>1</sup>H and <sup>13</sup>C NMR of compound 8b

BR1702TPTOP\_1H-4.esp

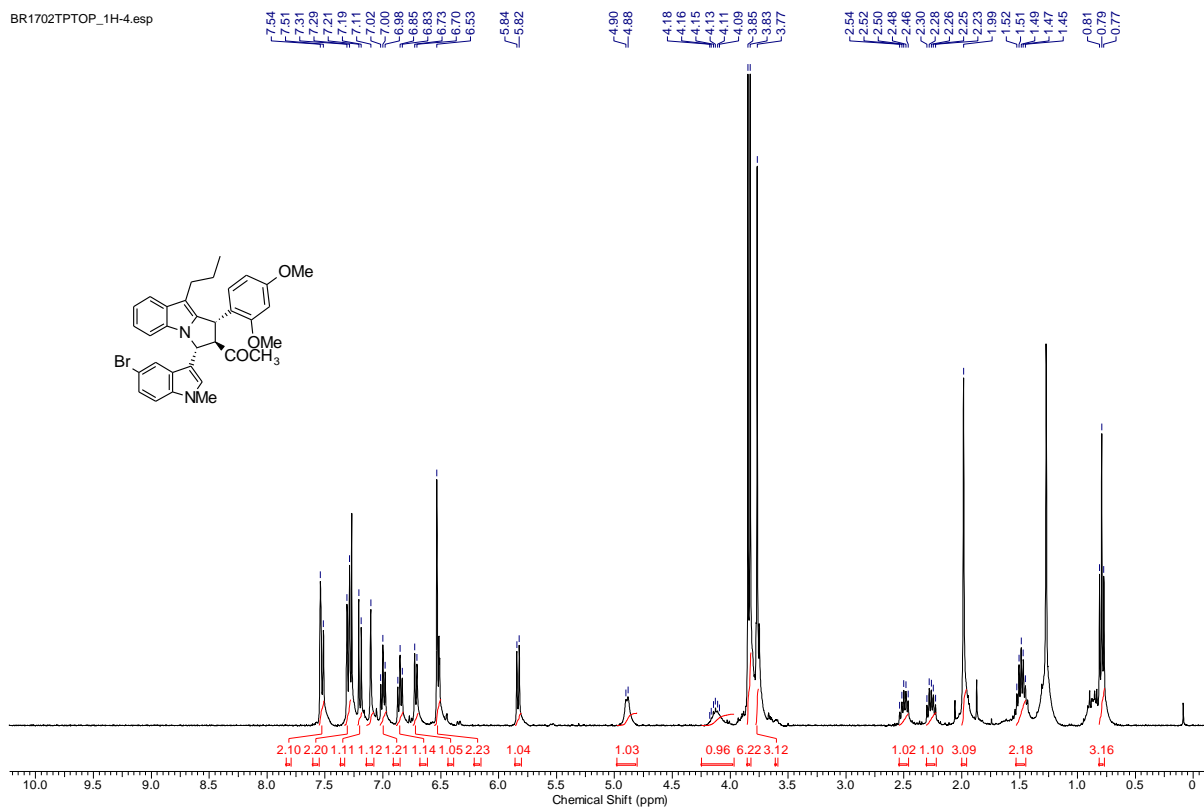

BR1702TPTOP\_13C-3.esp

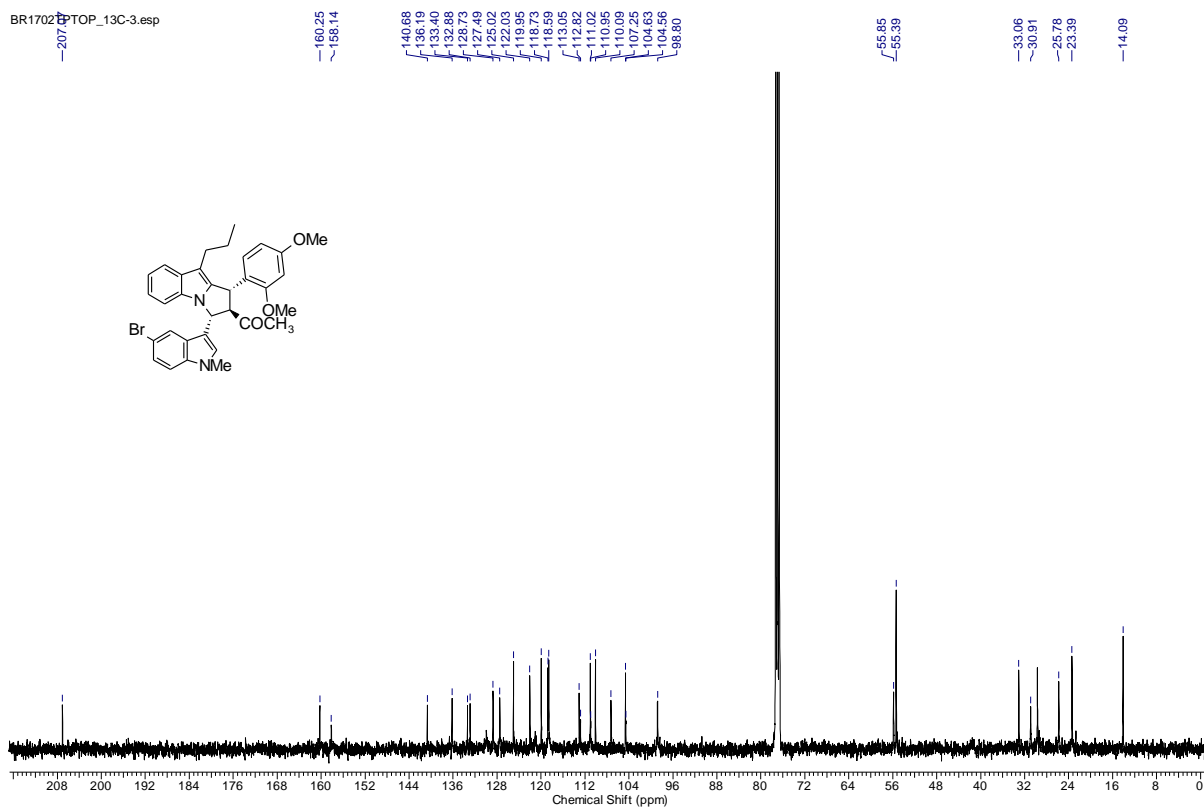

# <sup>1</sup>H and <sup>13</sup>C NMR of compound 8b'

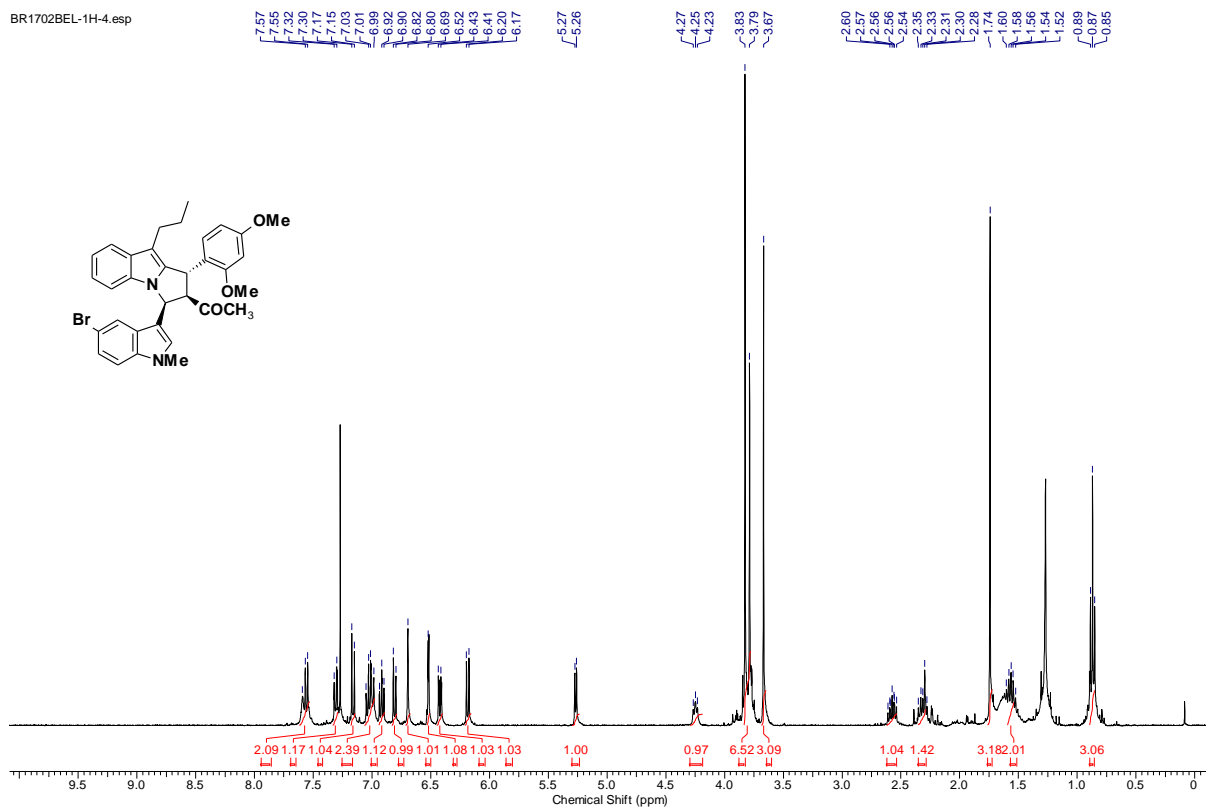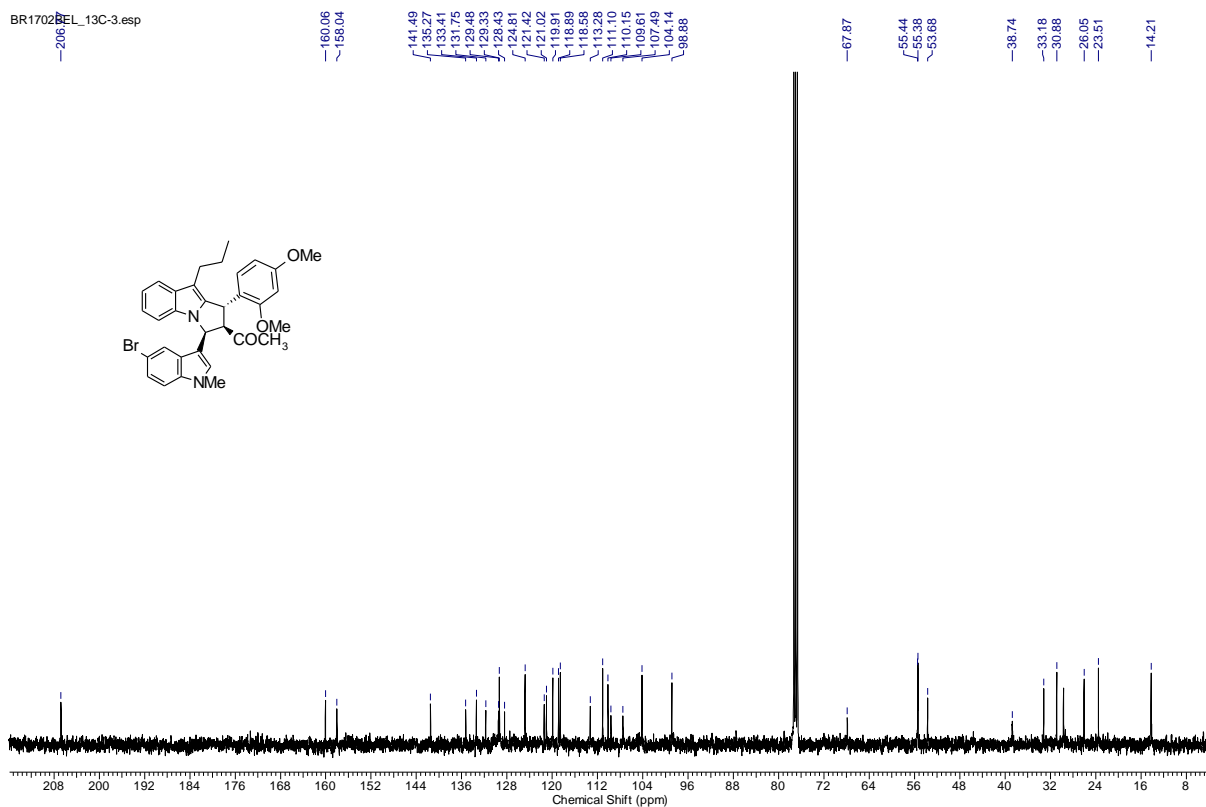

# $^1\text{H}$ and $^{13}\text{C}$ NMR of compound 8c

BR1225\_PROTON-4.esp

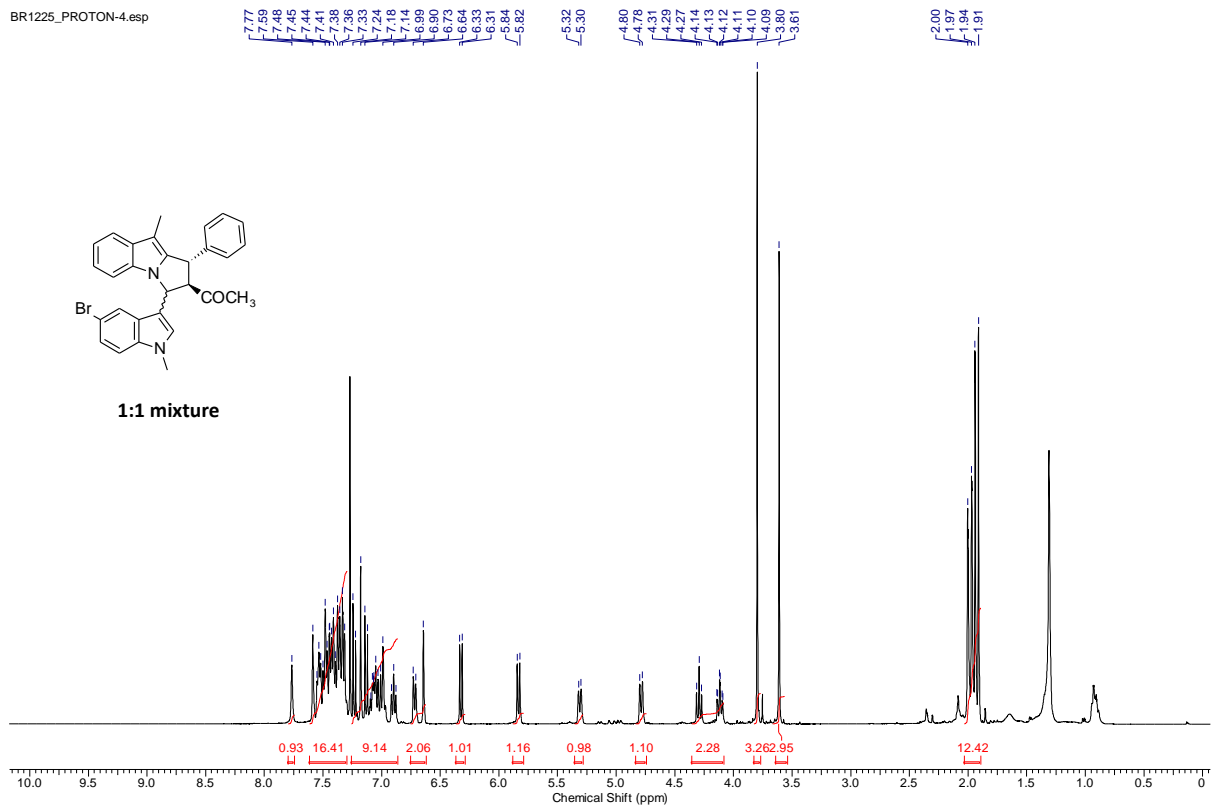

BR1225\_13C-1.esp

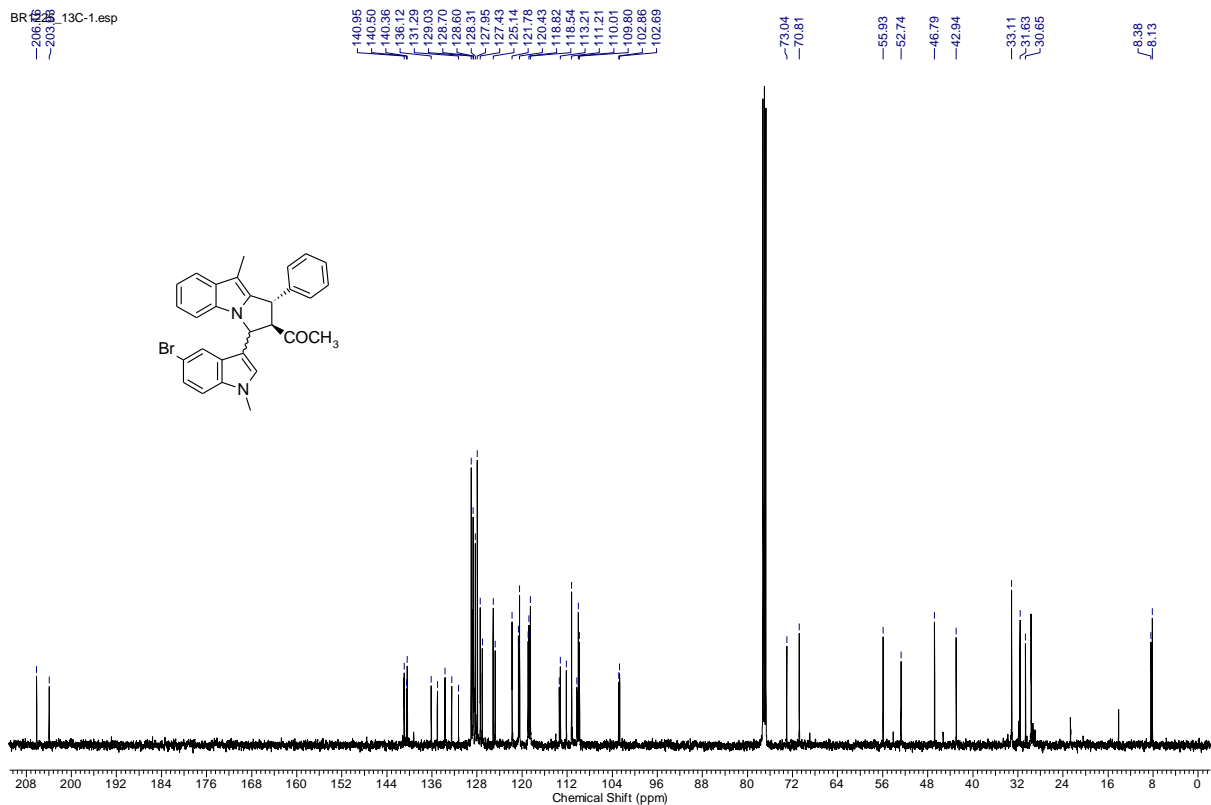

# <sup>1</sup>H and <sup>13</sup>C NMR of compound 8d

BR1233PTOP\_1H-4.esp

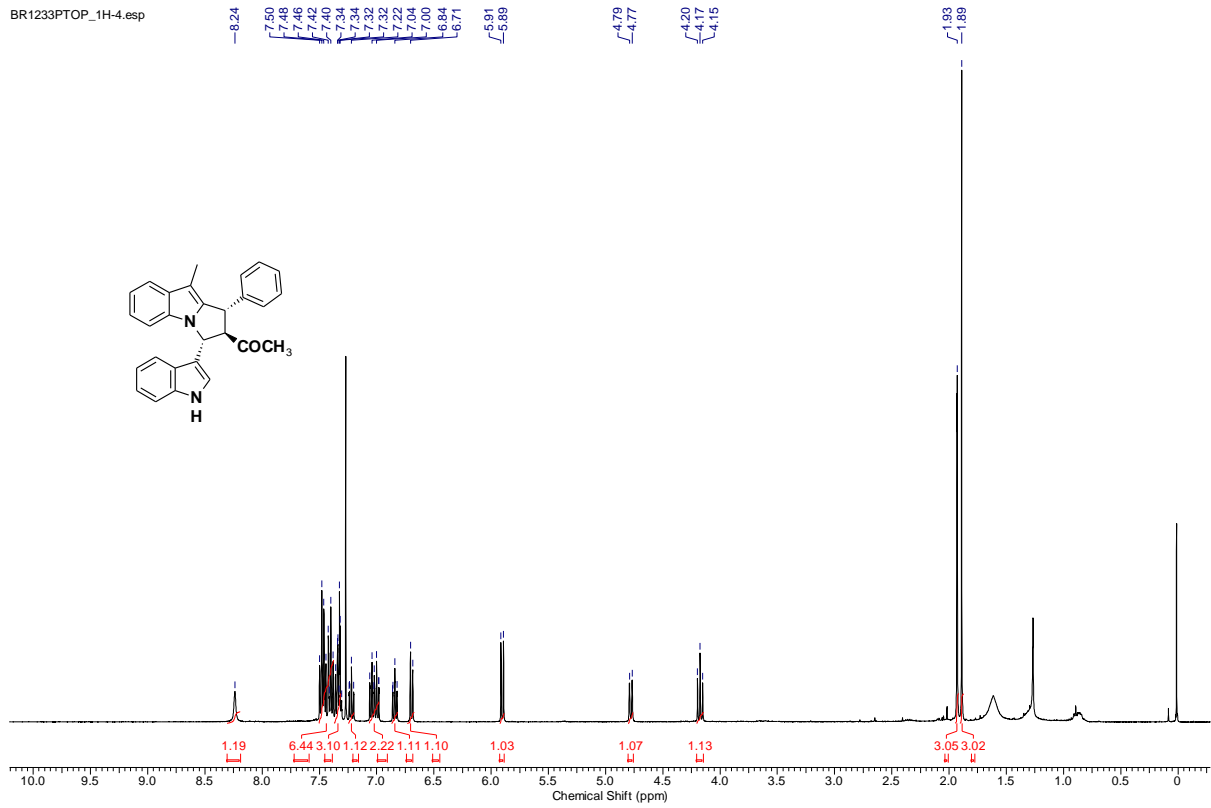

BR1233PTOP\_13C-2.jdf

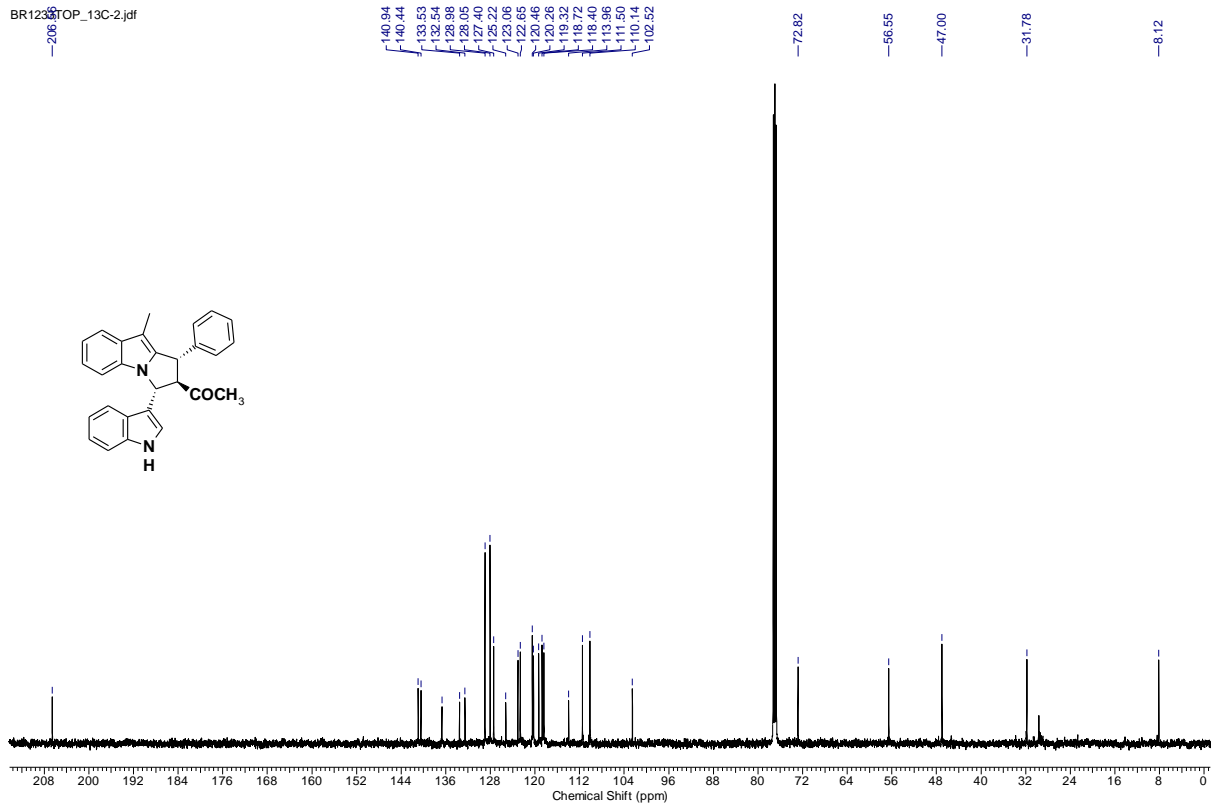

# <sup>1</sup>H and <sup>13</sup>C NMR of compound 8d'

BR1233PBEL\_1H-4.esp

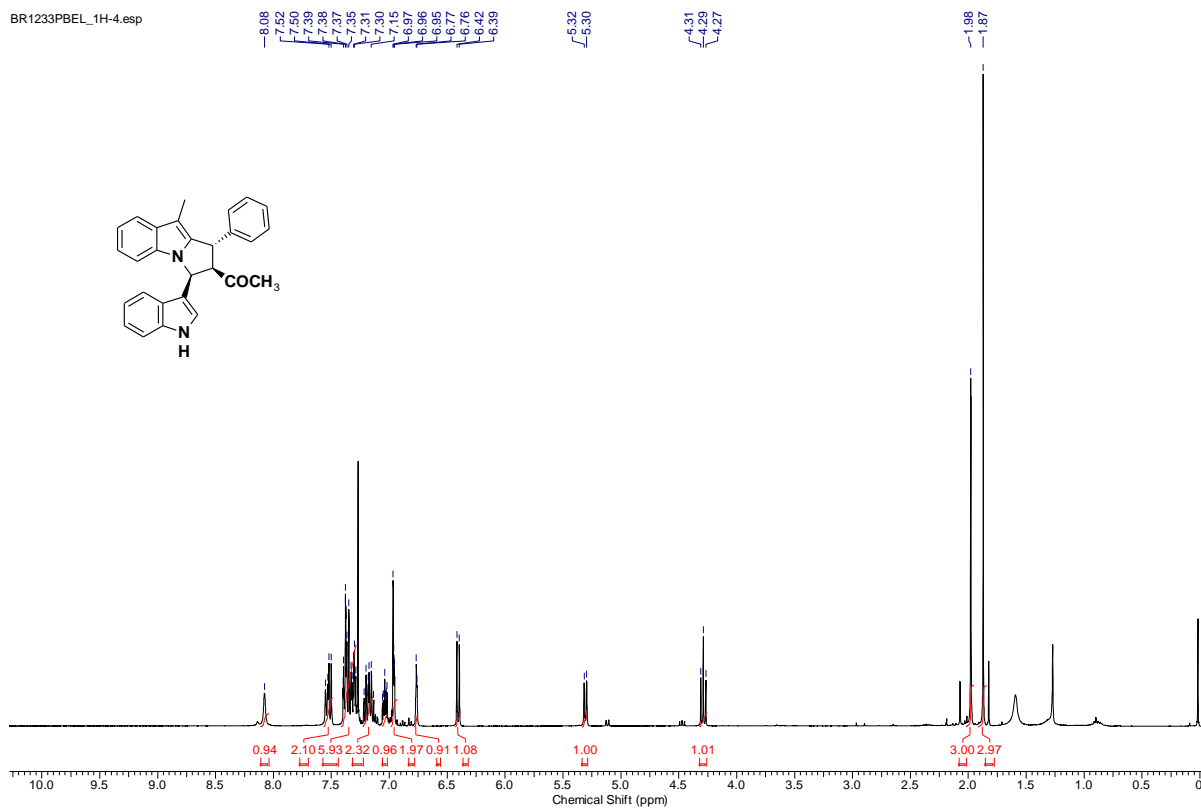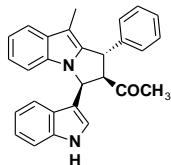

BR1233BE15W\_13C-3.esp

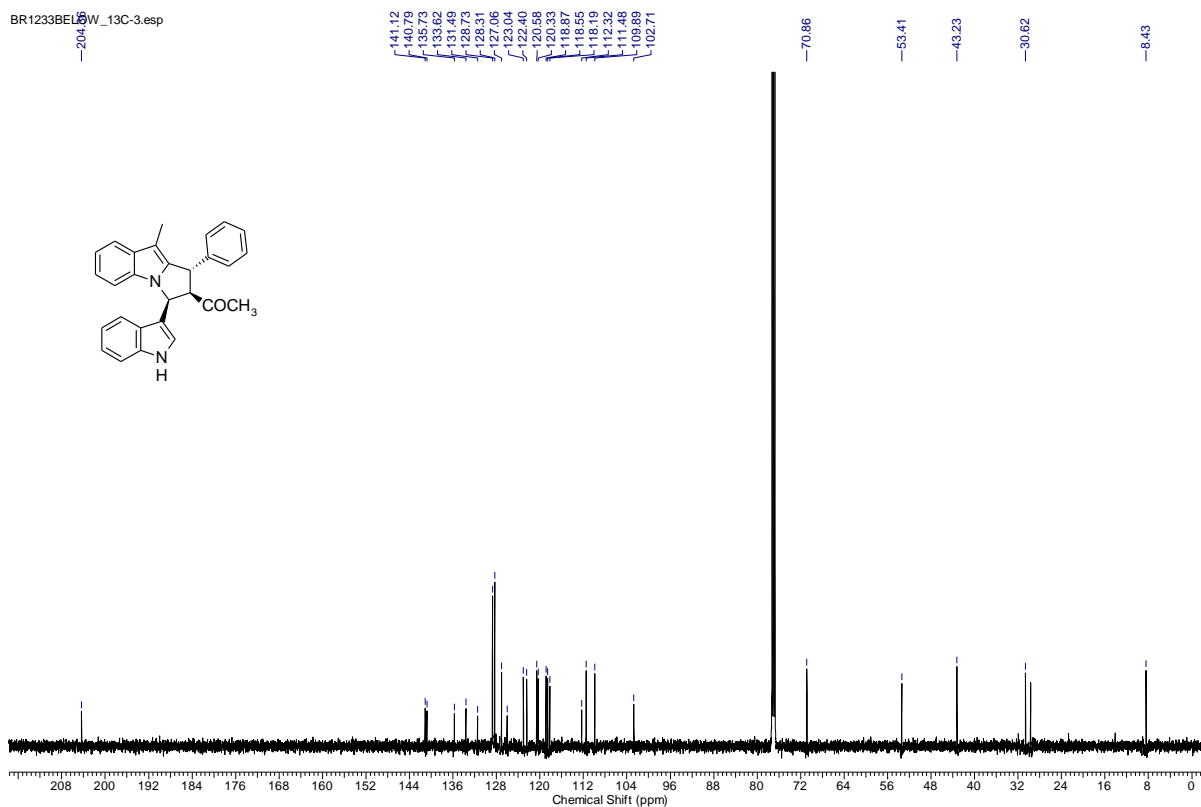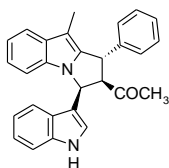

# <sup>1</sup>H and <sup>13</sup>C NMR of compound 8e

BR1234TOP\_PROTON-4.esp

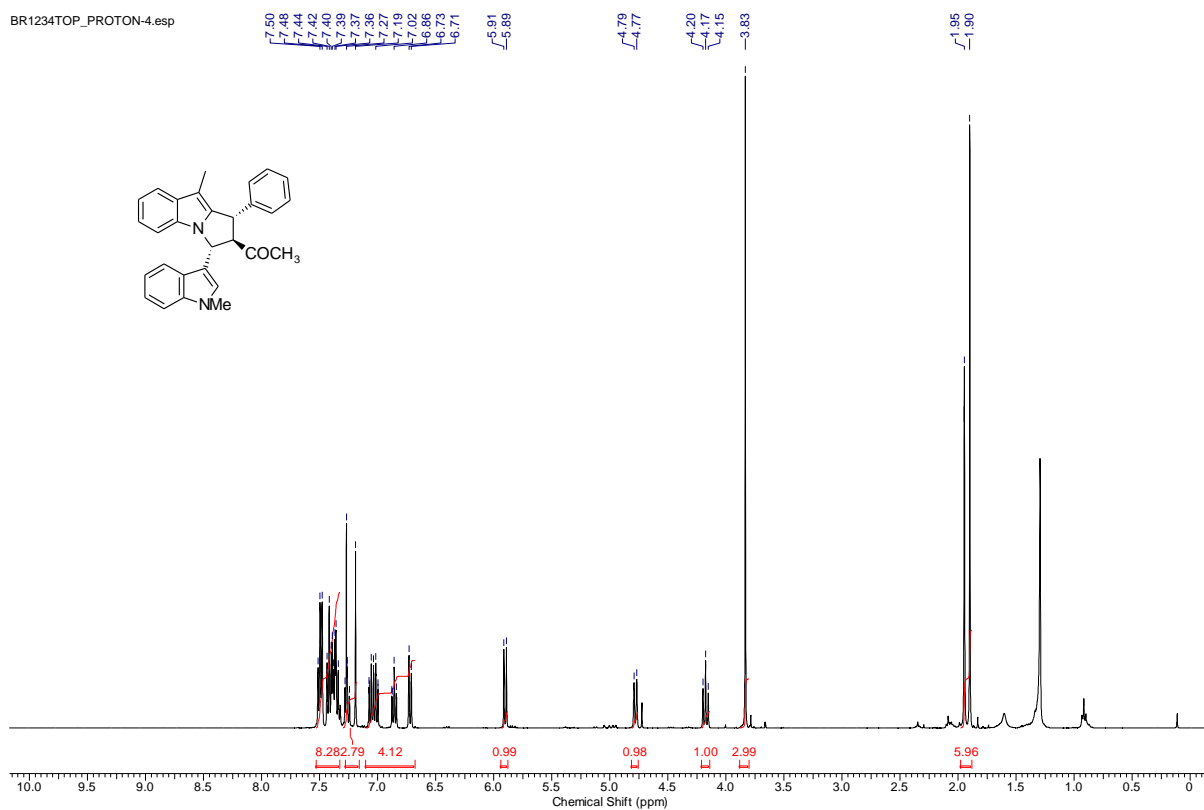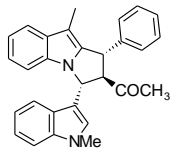

BR1234TOP\_13C-2.esp

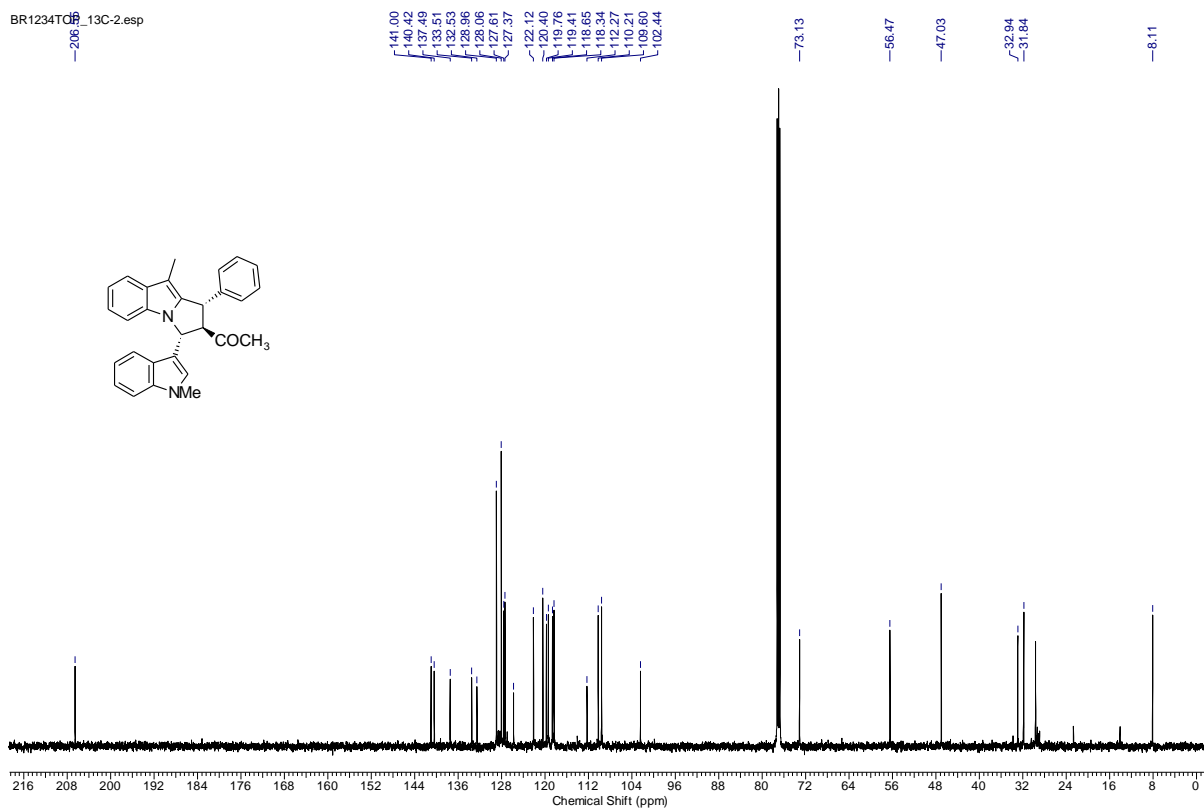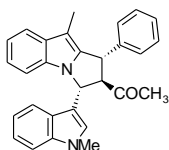



# <sup>1</sup>H and <sup>13</sup>C NMR of compound 8e'

BR1234BEL\_PROTON-4.esp

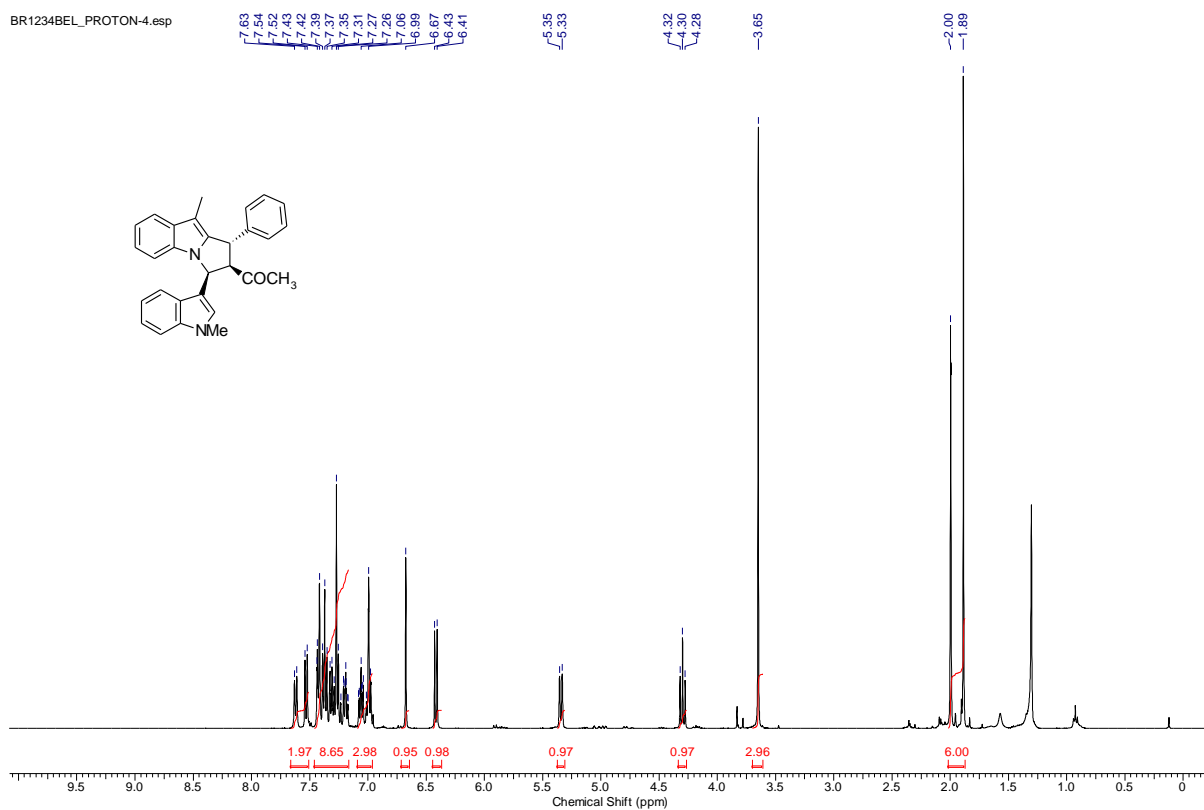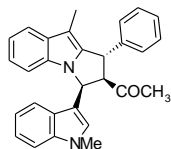

BR1234BELOW\_13C-2.esp

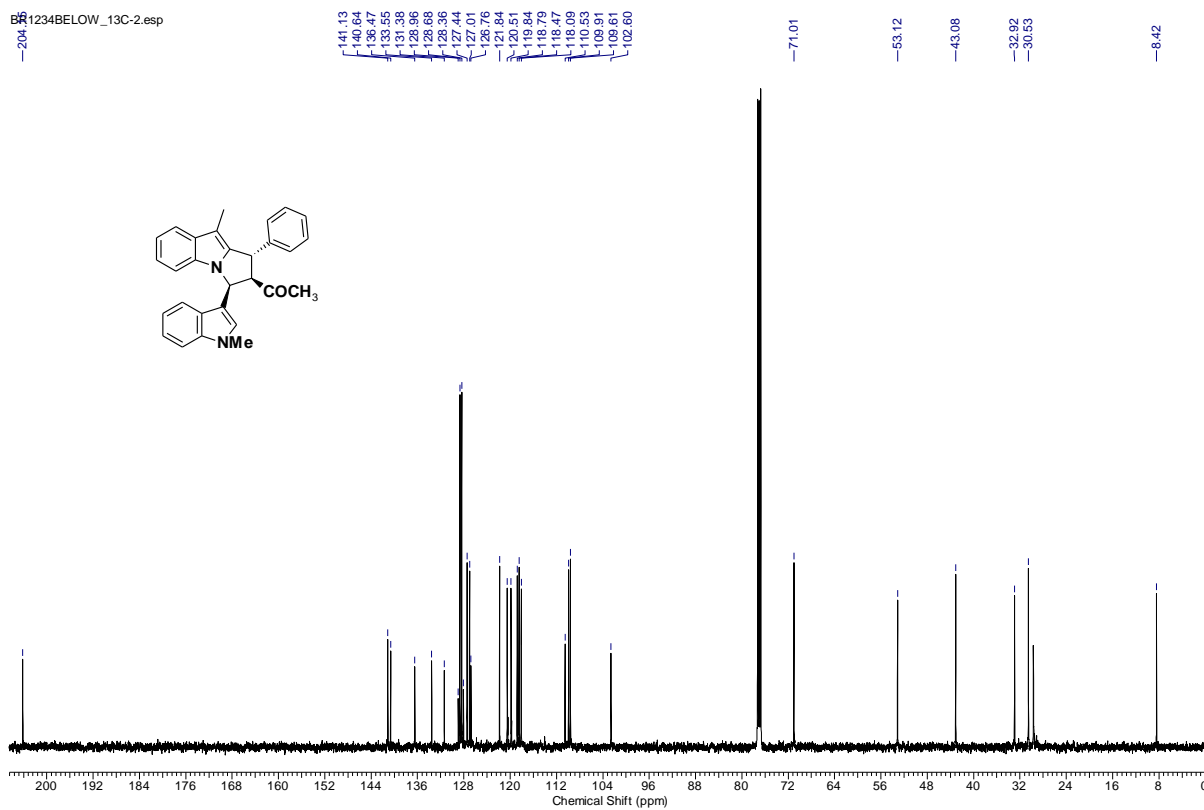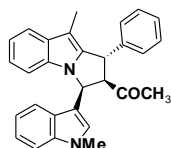

# <sup>1</sup>H and <sup>13</sup>C NMR of compound 8f'

BR1236BELOW\_PROTON-4.esp

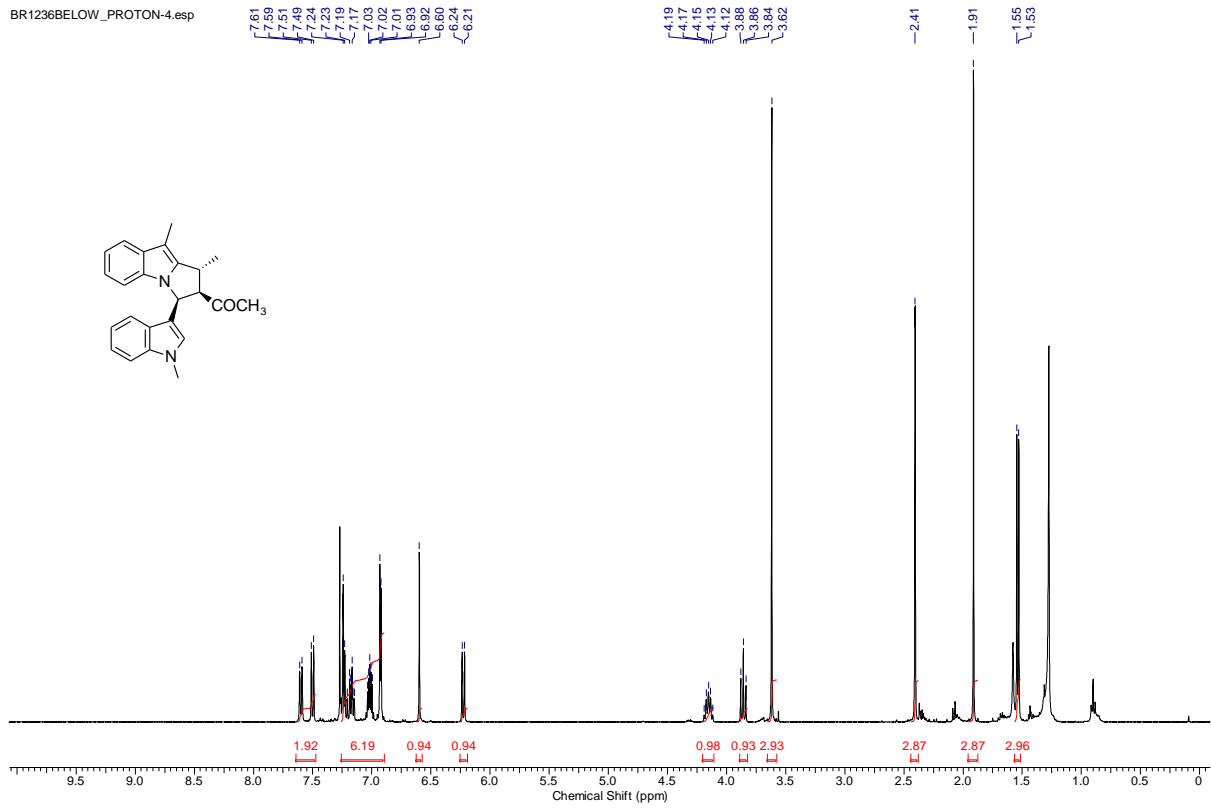

BR1236BELOW\_13C-2.esp

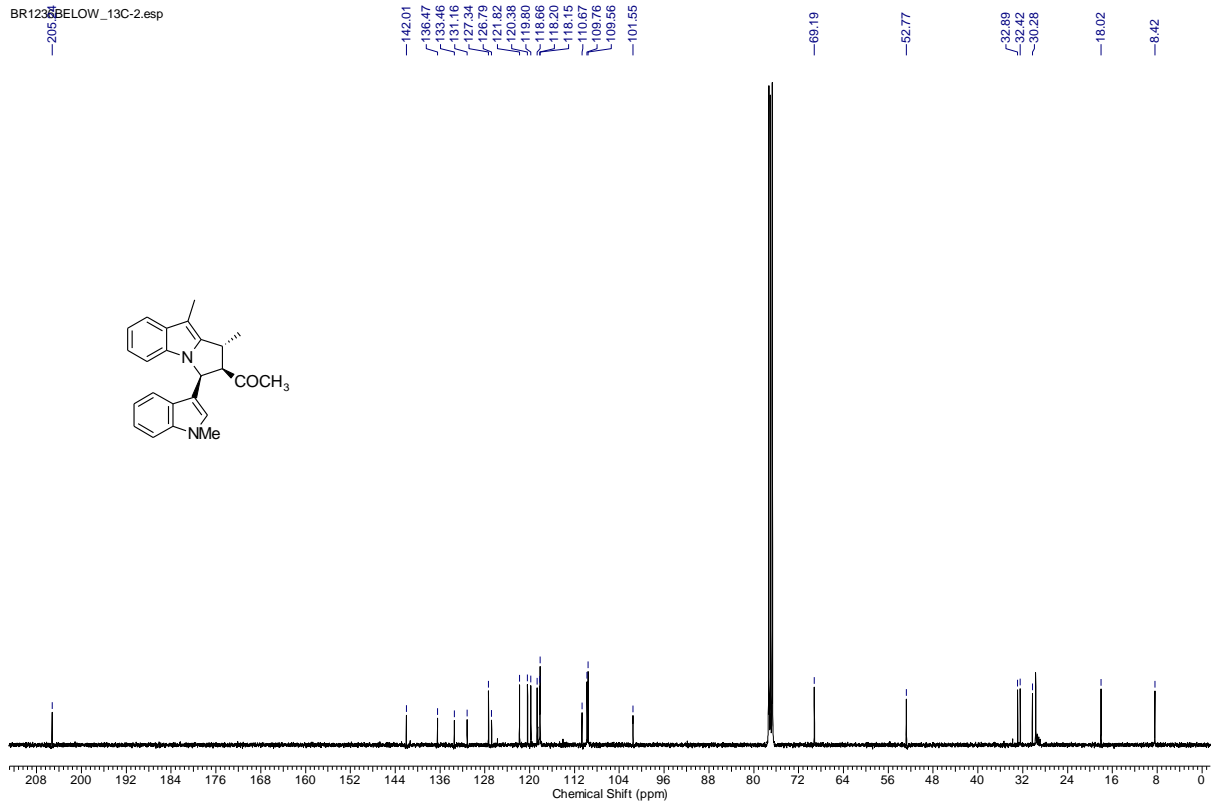

# <sup>1</sup>H and <sup>13</sup>C NMR of compound 8f

BR1236TOP\_PROTON-4.esp

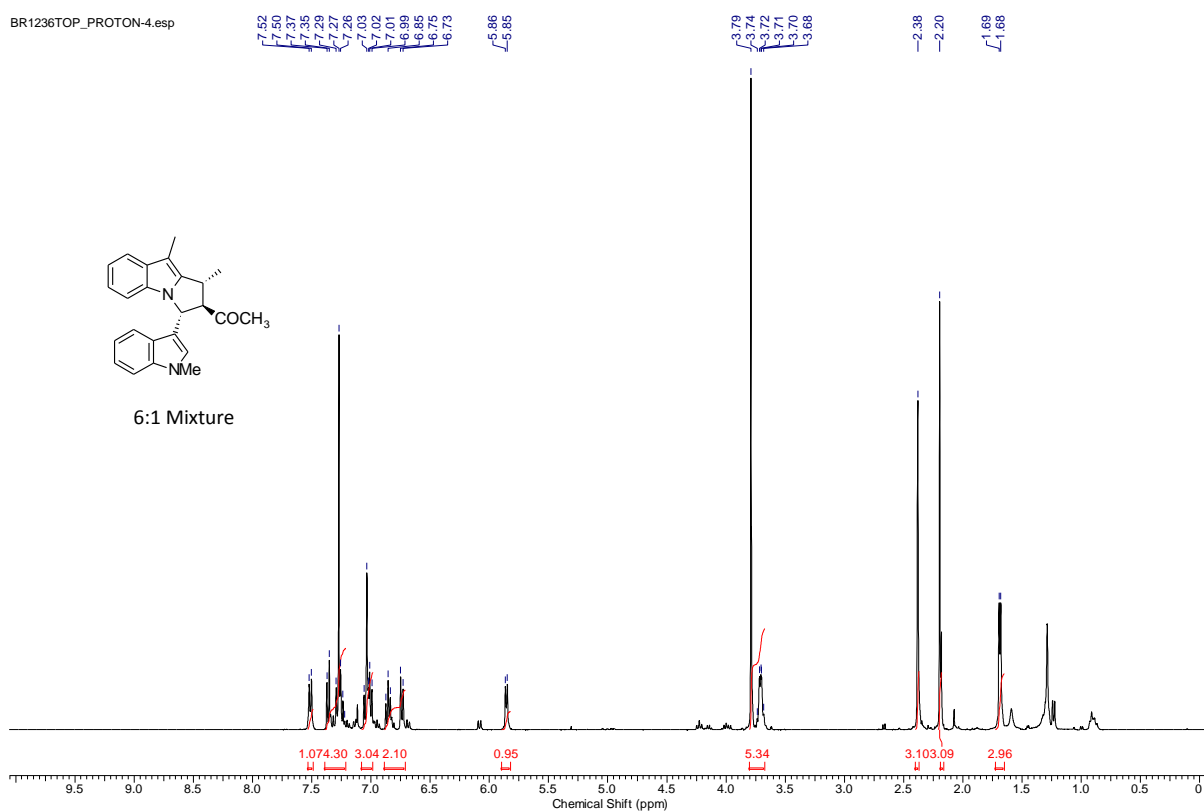

BR1236TOP\_13C-3.esp

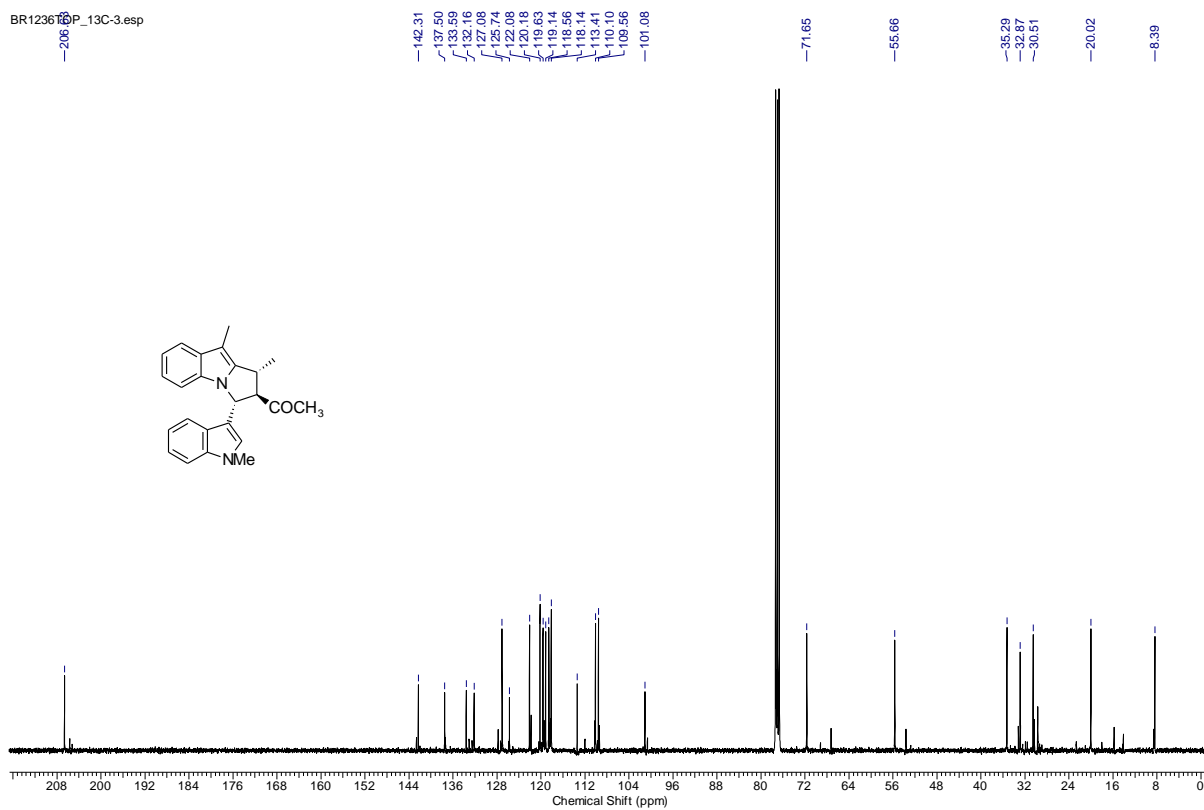

# <sup>1</sup>H and <sup>13</sup>C NMR of compound 8g'

BR1238BEL\_PROTON-5.esp

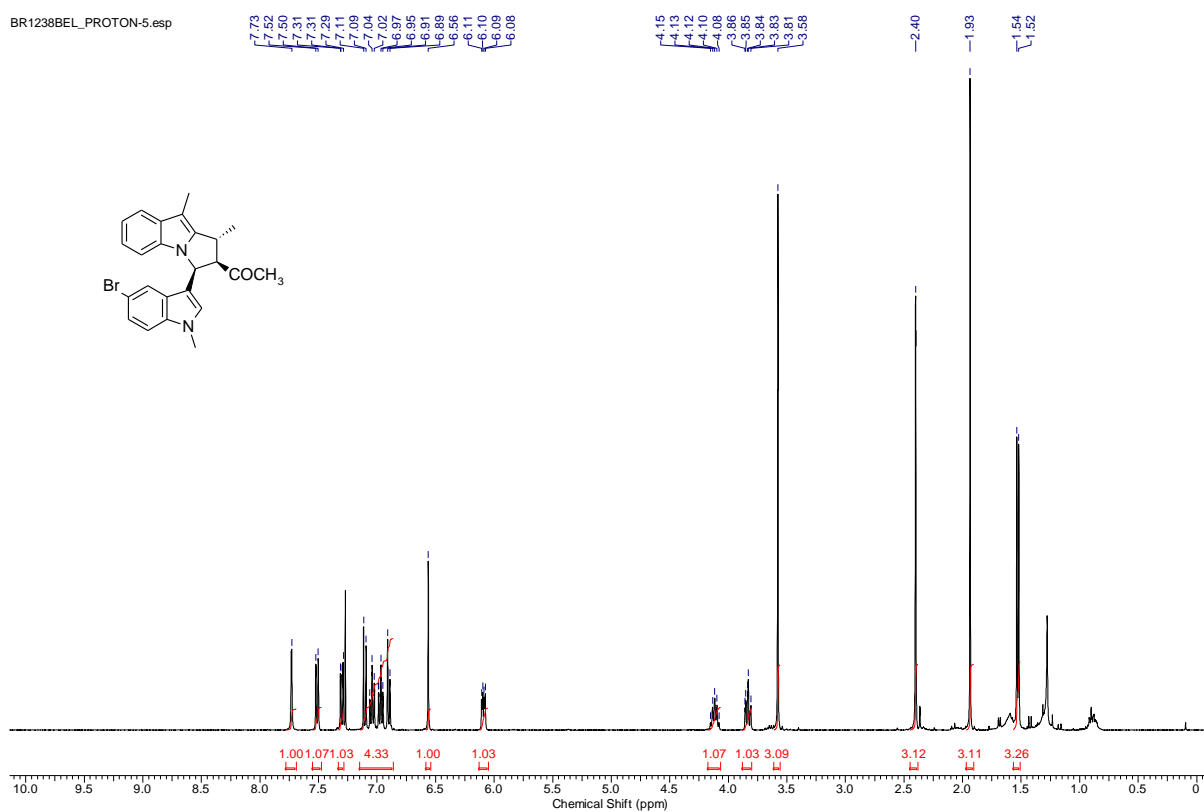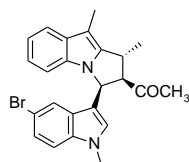

BR1238BEL\_13C-3.esp

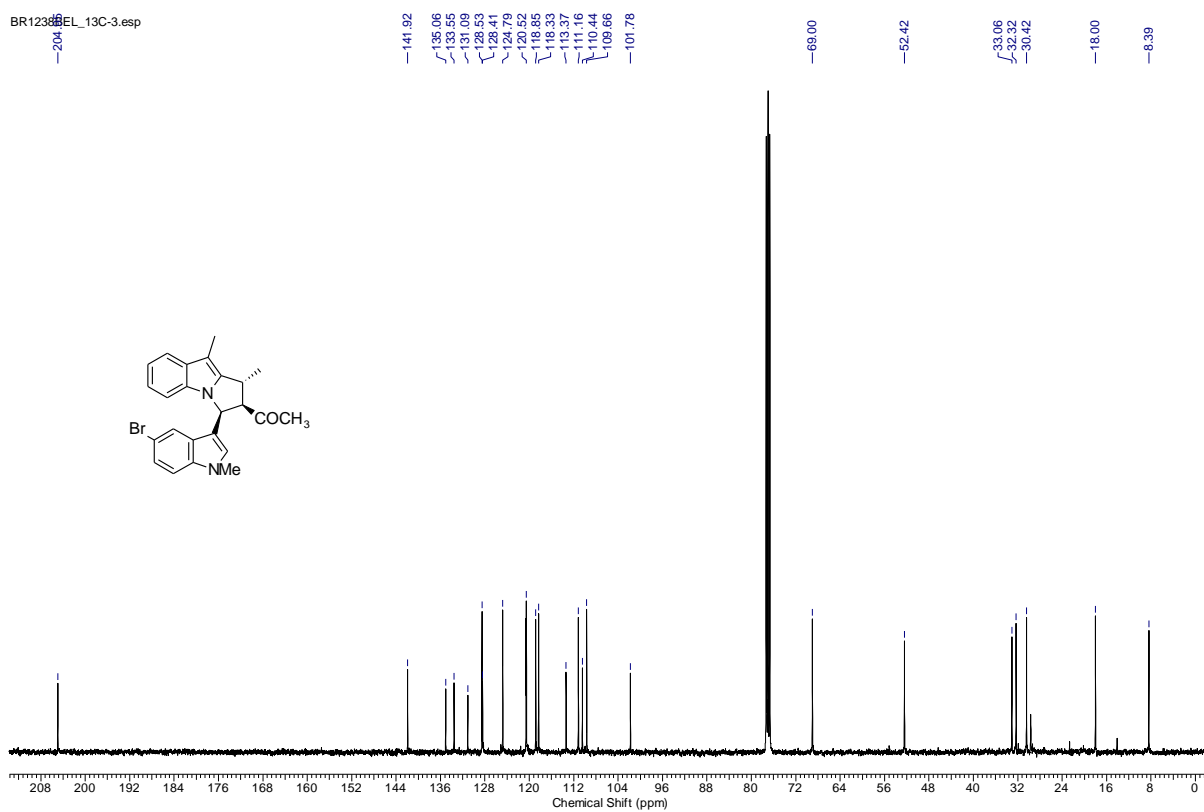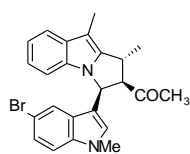

# $^1\text{H}$ and $^{13}\text{C}$ NMR of compound 8g

BR1238TOP\_PROTON-4.jdf

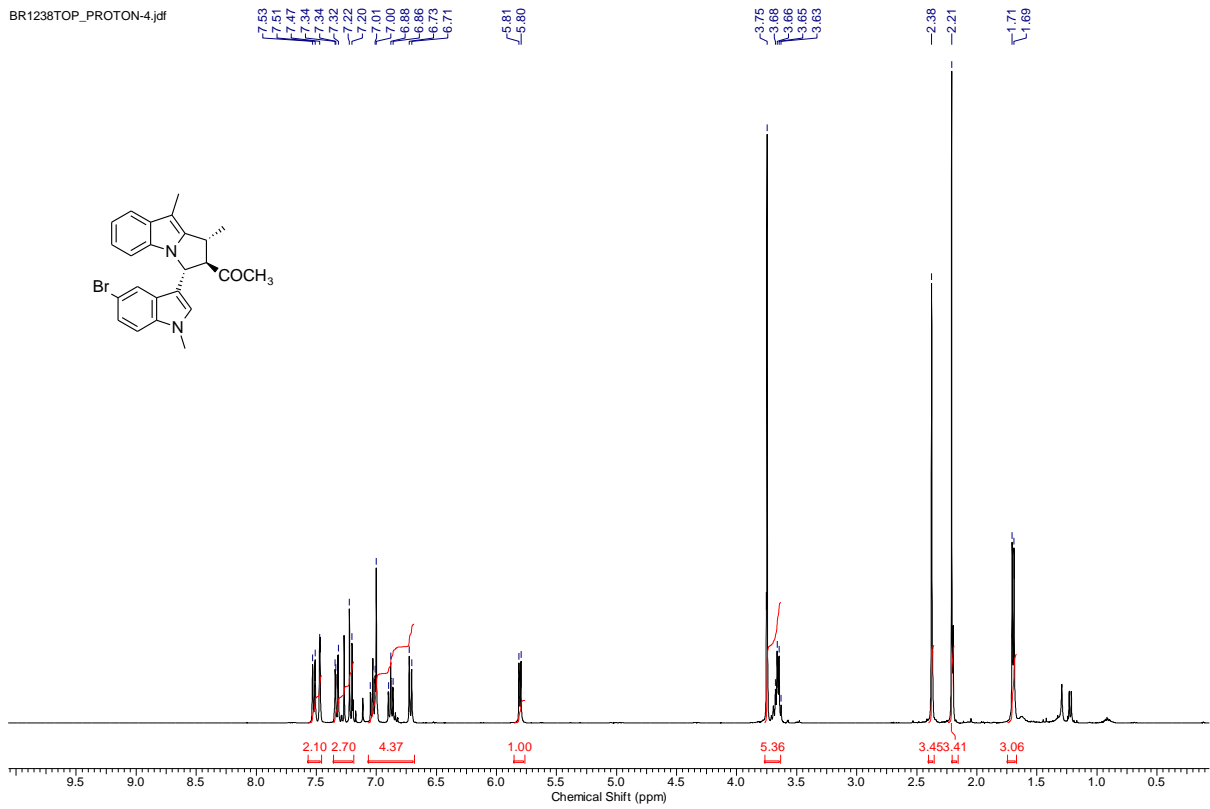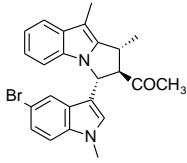

BR1238TOP\_13C-1.esp

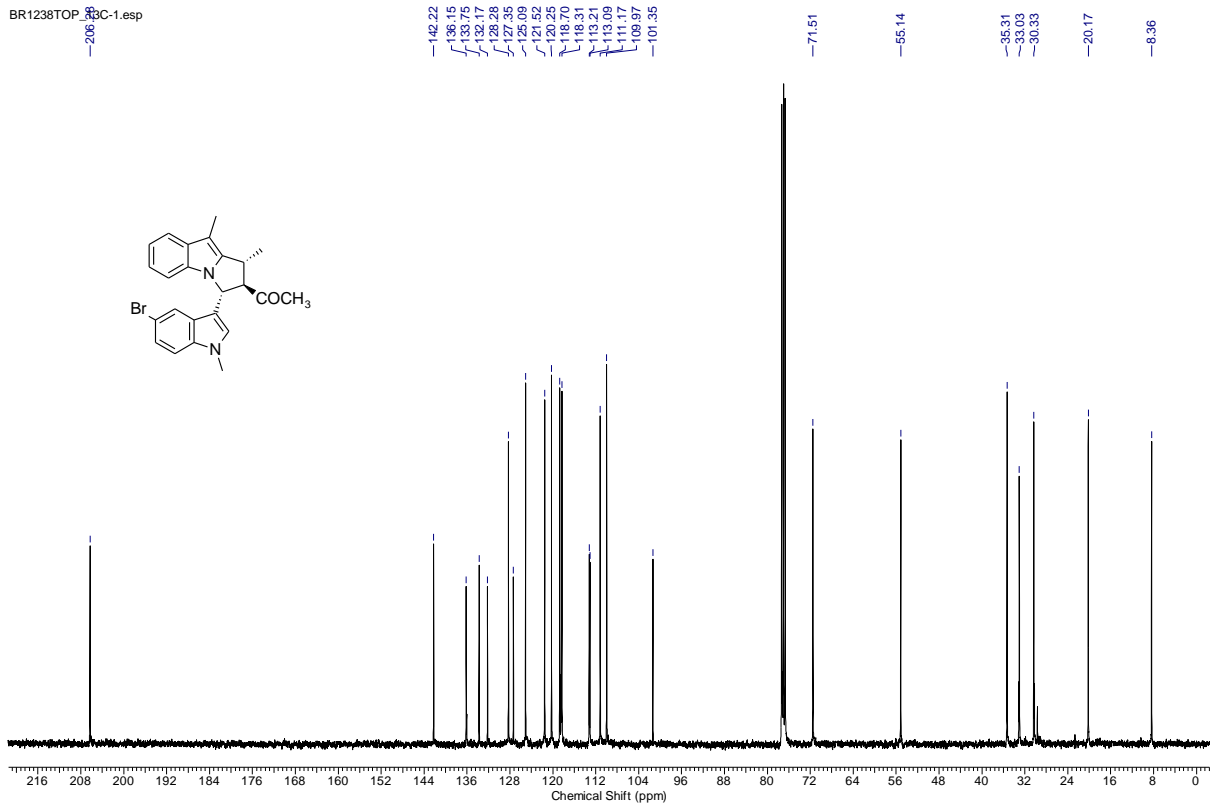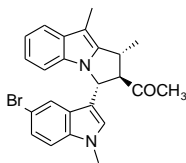

# <sup>1</sup>H and <sup>13</sup>C NMR of compound 10a'

BR1703BEPHE\_1H-4.esp

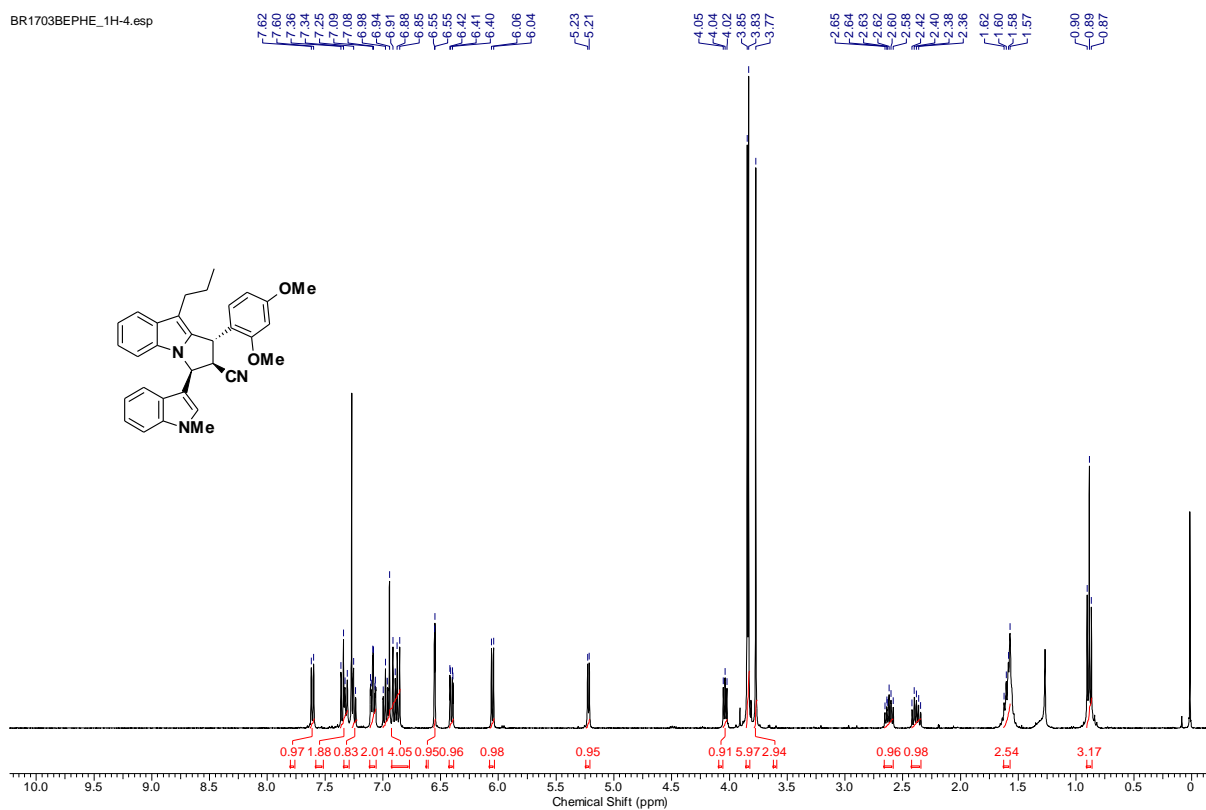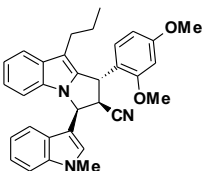

BR1703BEL\_13C-2.esp

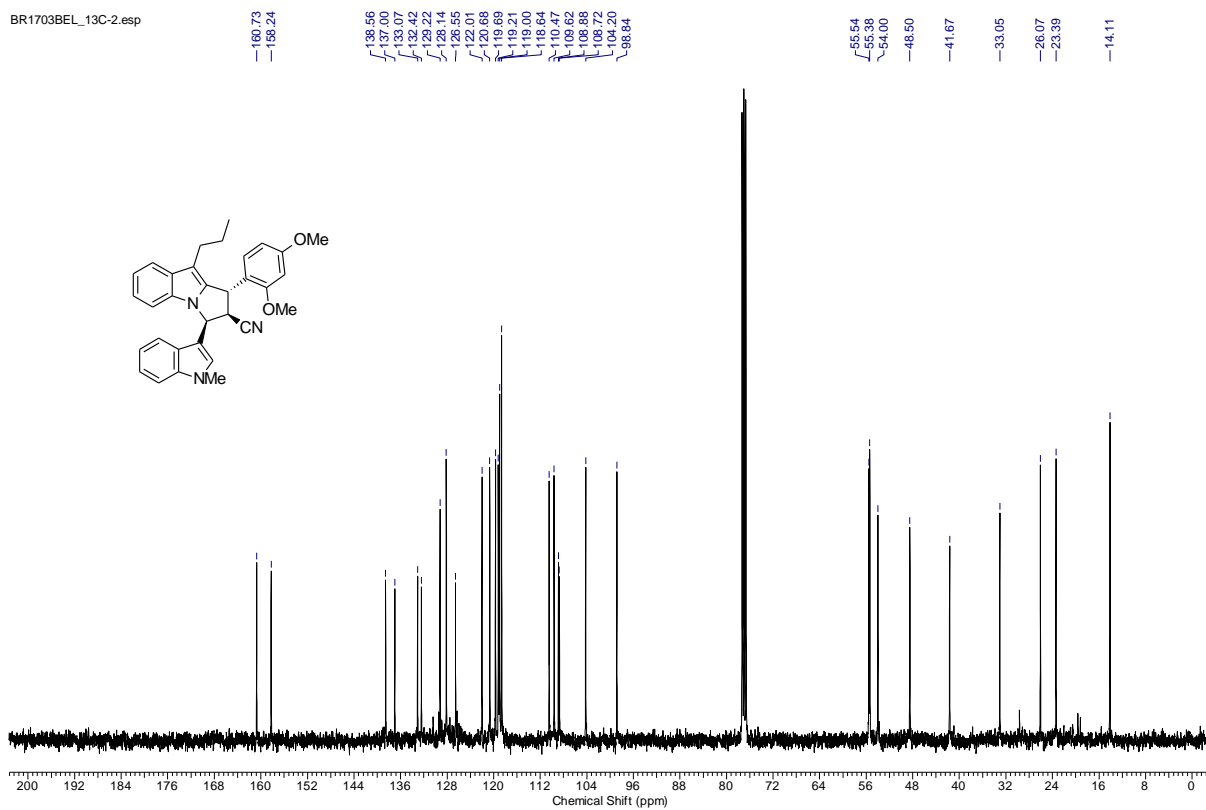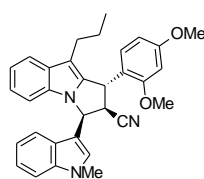

# <sup>1</sup>H and <sup>13</sup>C NMR of compound 10a

BR1703TOP-1H-4.esp

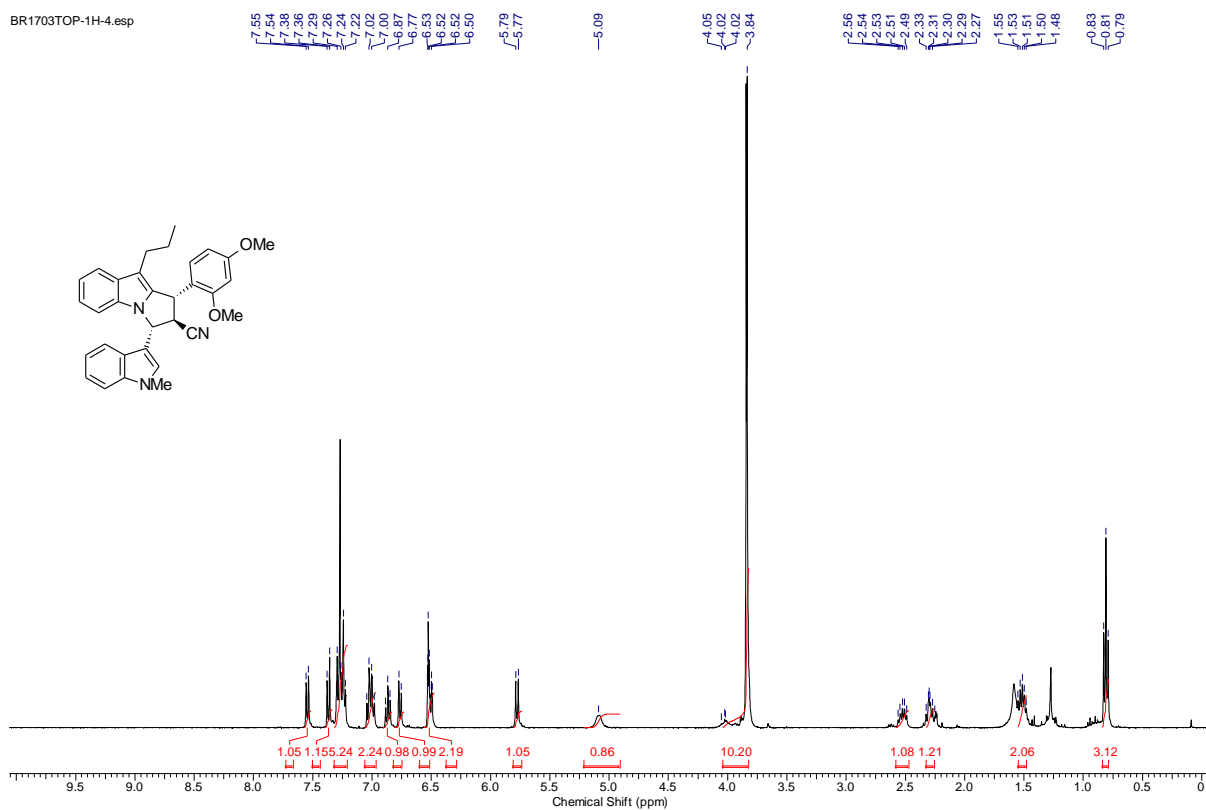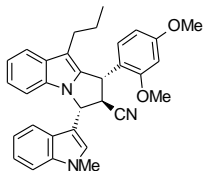

BR1703TOP\_13C-3.esp

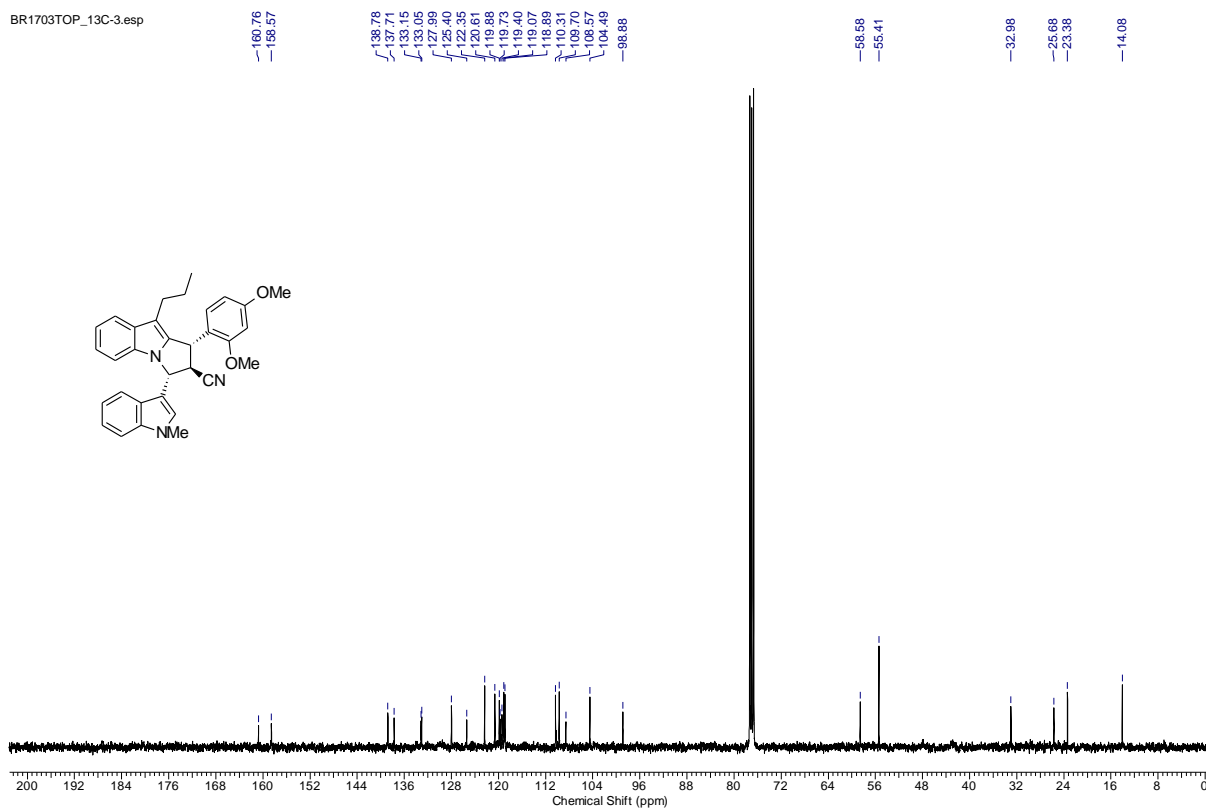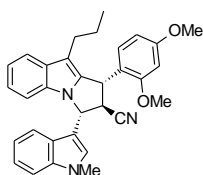

# <sup>1</sup>H and <sup>13</sup>C NMR of compound 10b'

BR1696BEL-1H-2.esp

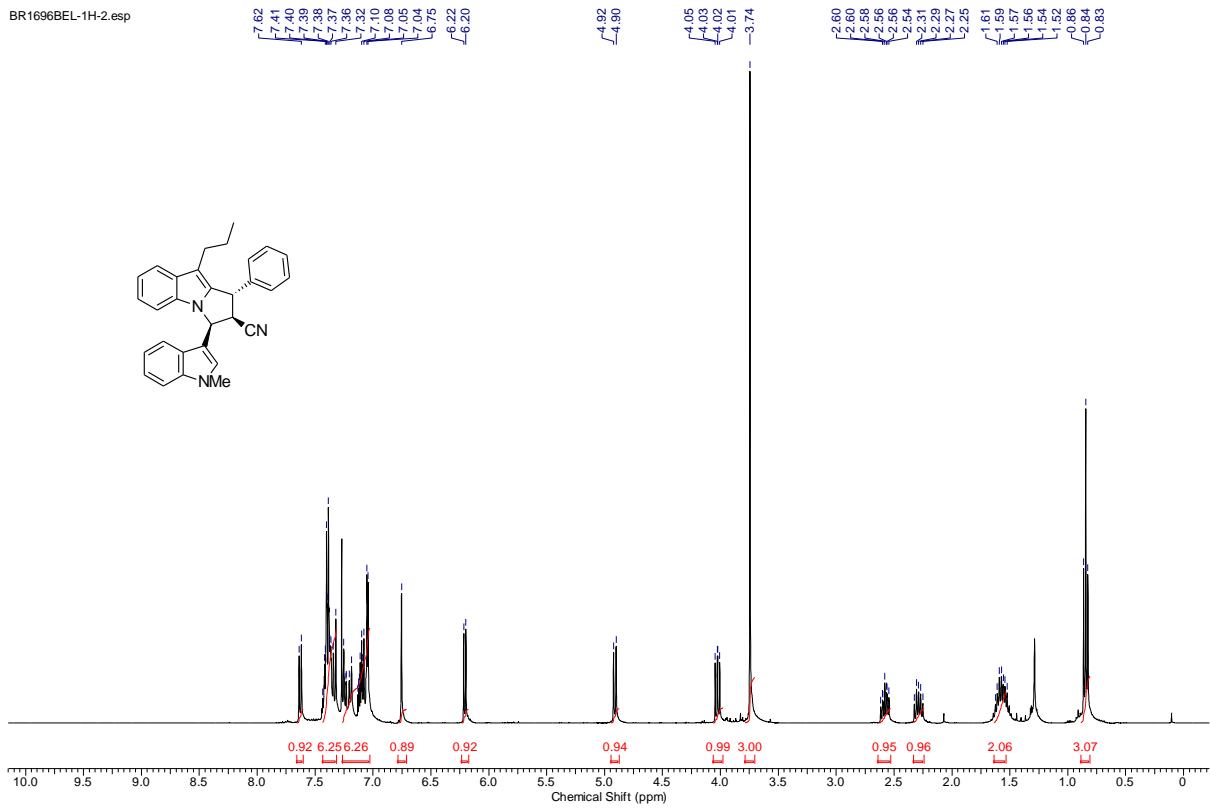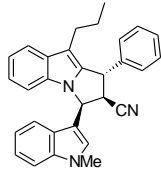

BR1696BEL-13C-2.esp

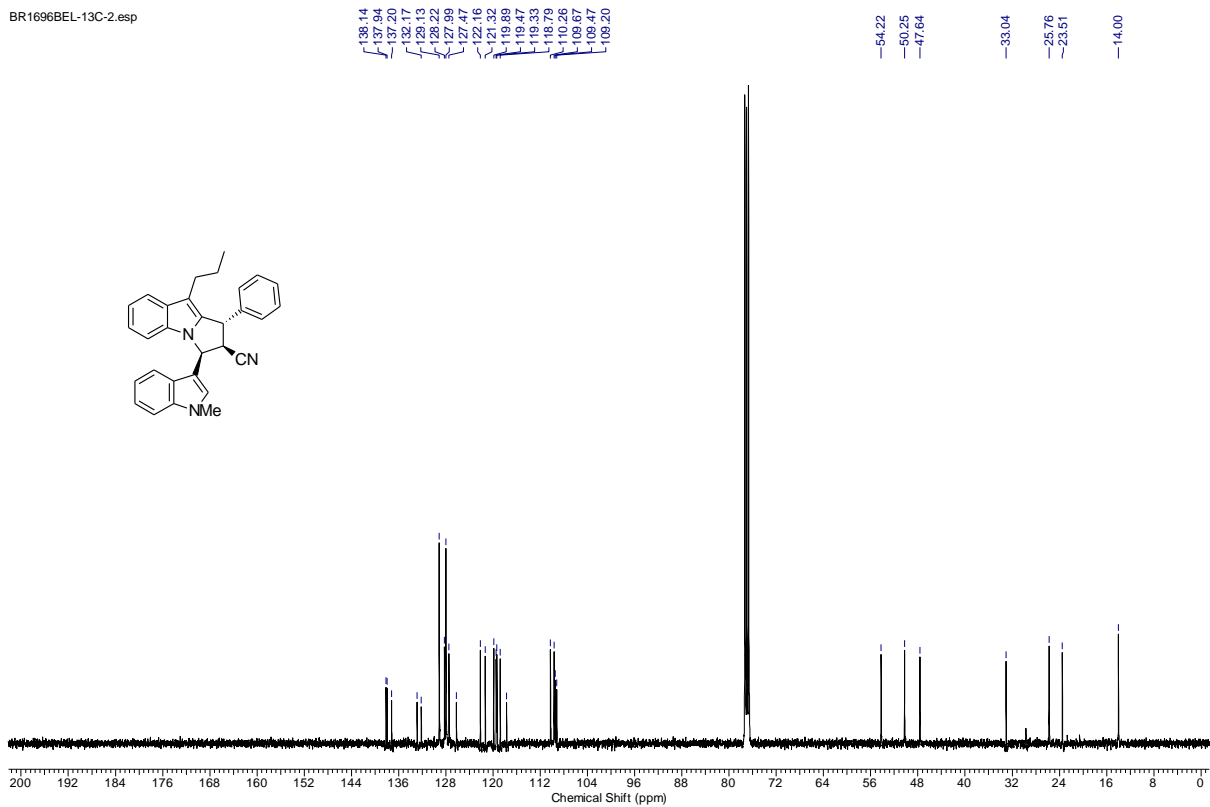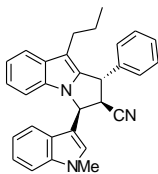



# <sup>1</sup>H and <sup>13</sup>C NMR of compound 10b

BR1696TOP-1H-4.esp

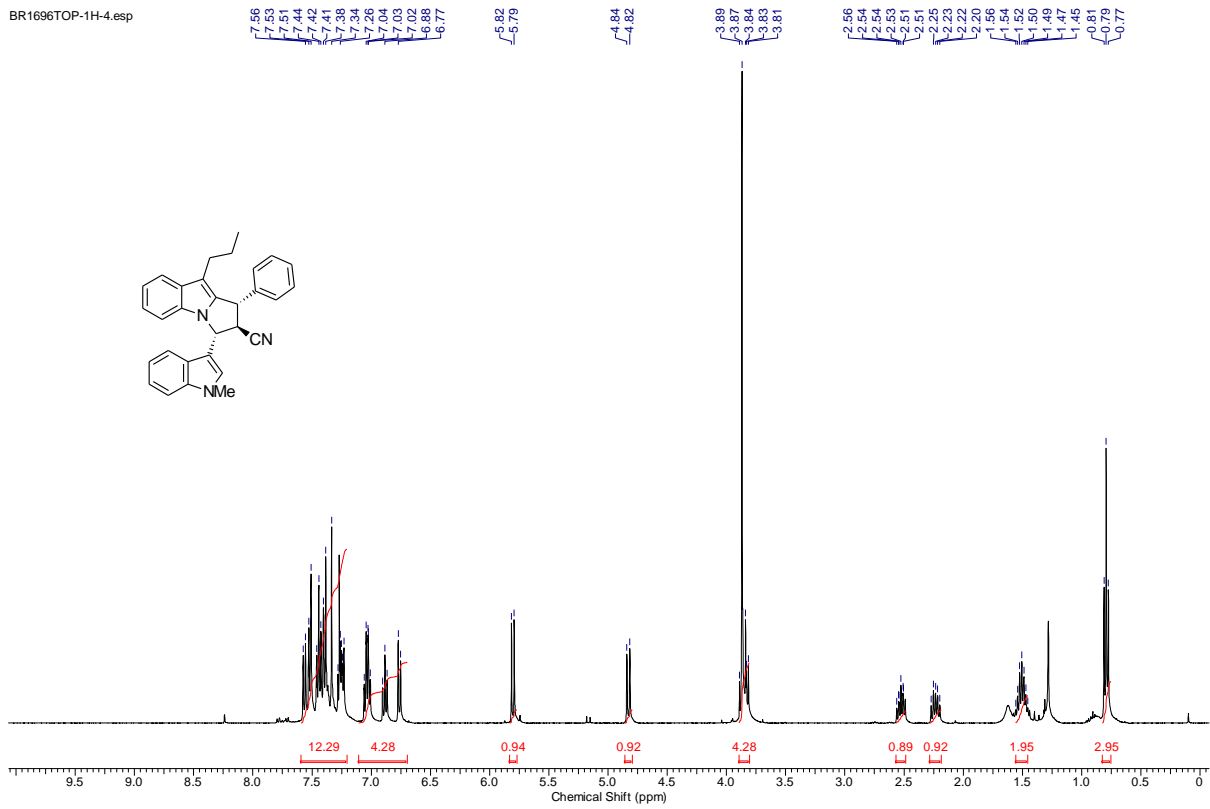

BR1696TOP-13C-2.esp

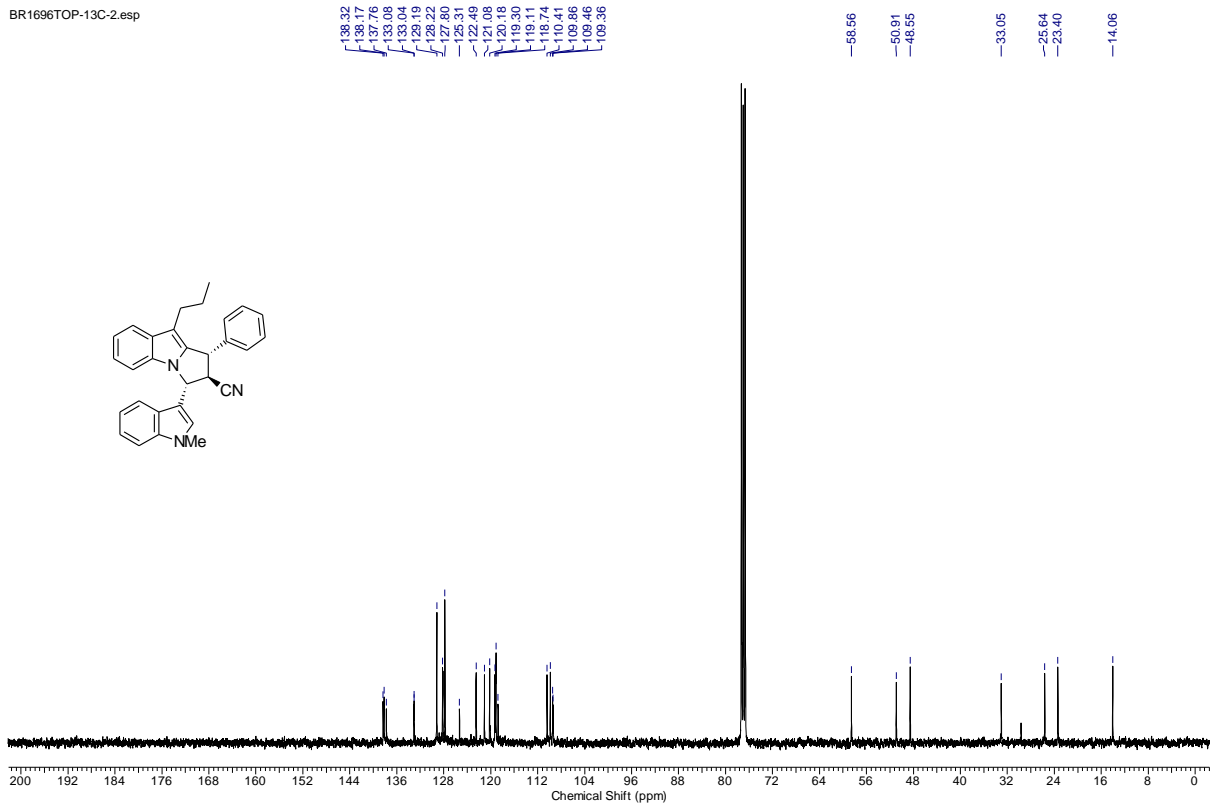

# <sup>1</sup>H and <sup>13</sup>C NMR of compound 10c

BR1216\_PROTON-4.esp

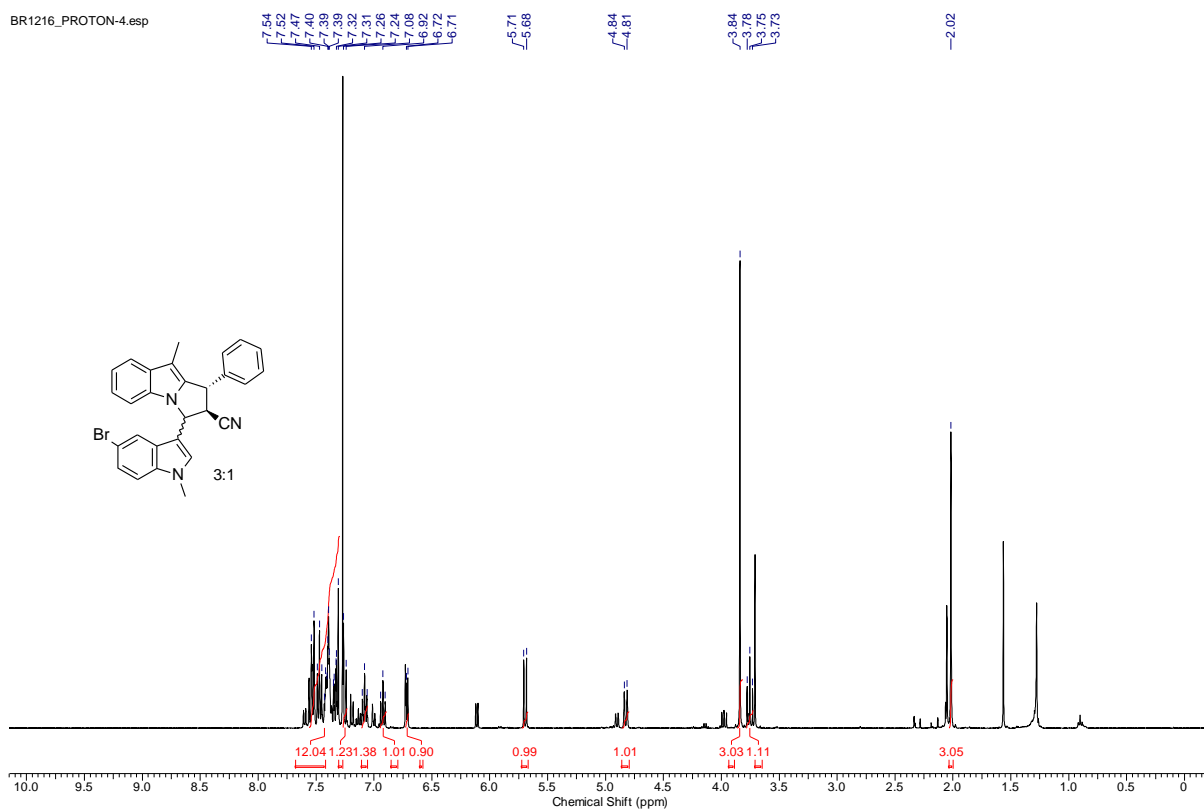

BR1216\_13C-2.esp

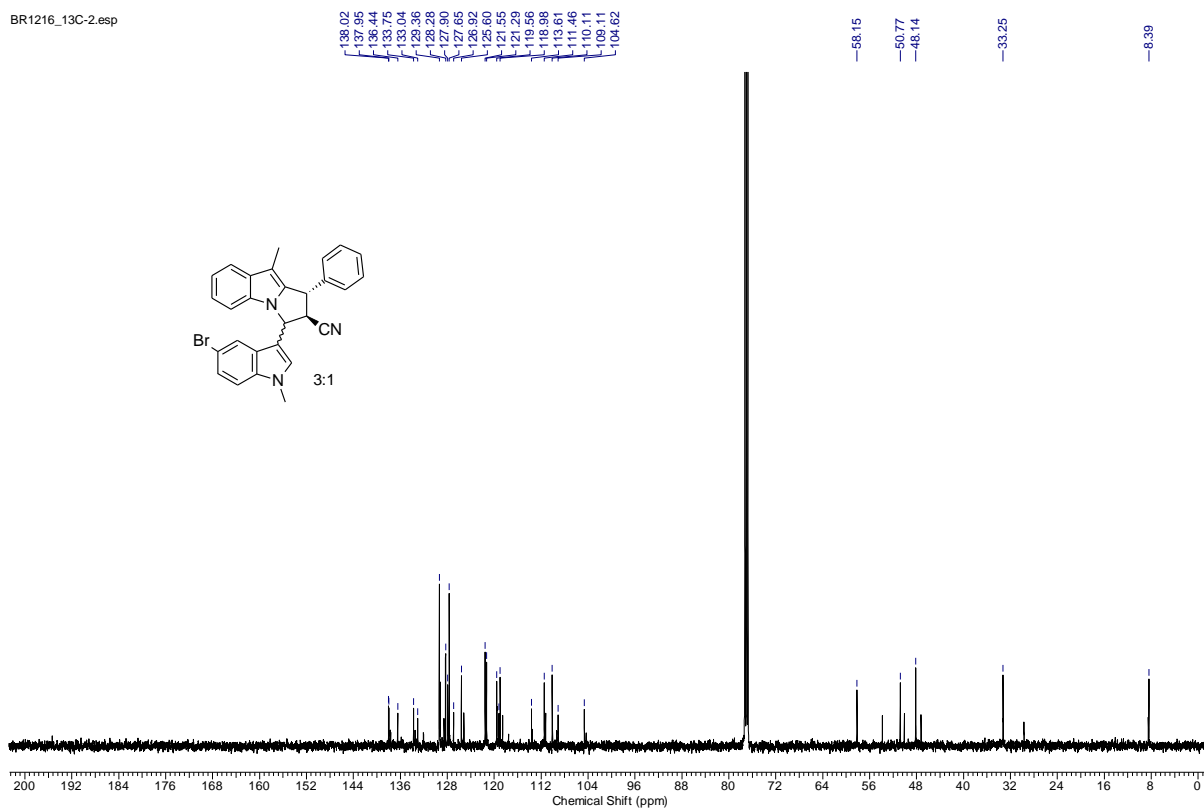

# <sup>1</sup>H and <sup>13</sup>C NMR of compound 10d'

BR1255BELOW\_PROTON-4.esp

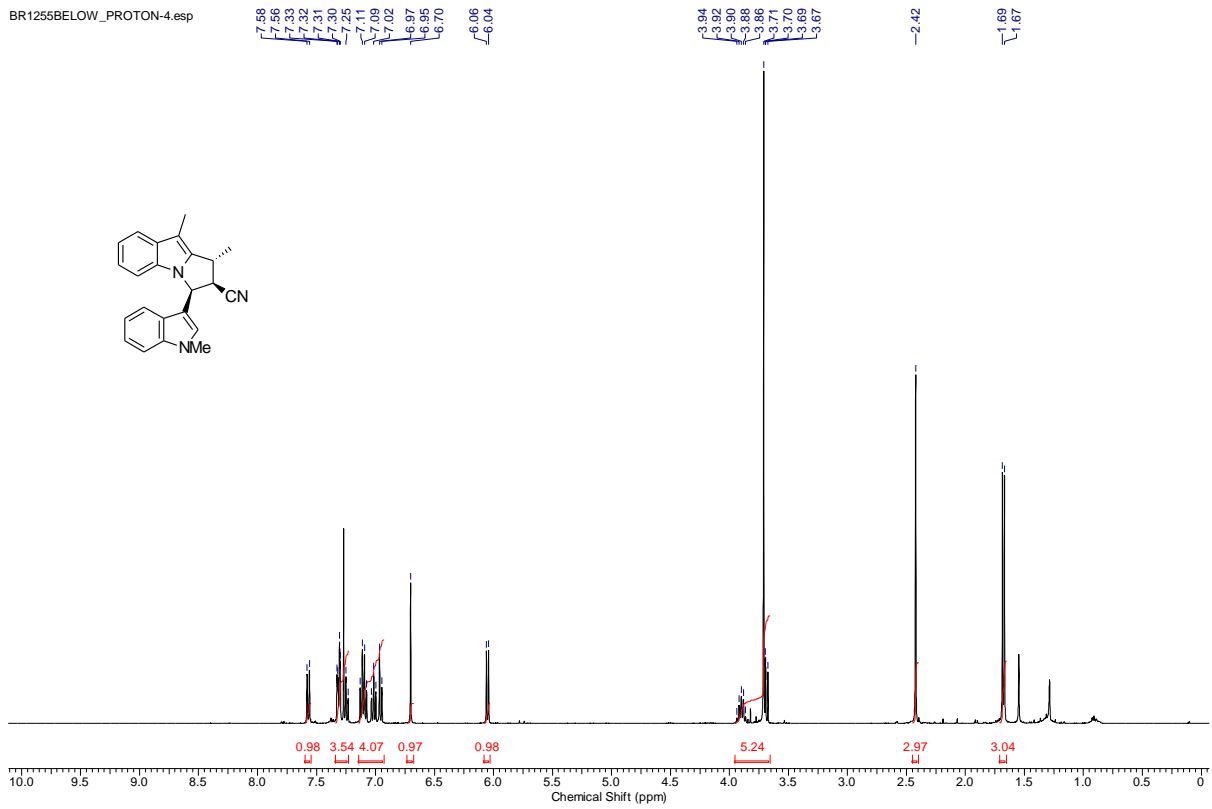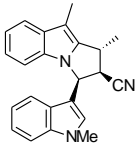

BR1255BL\_13C-2.esp

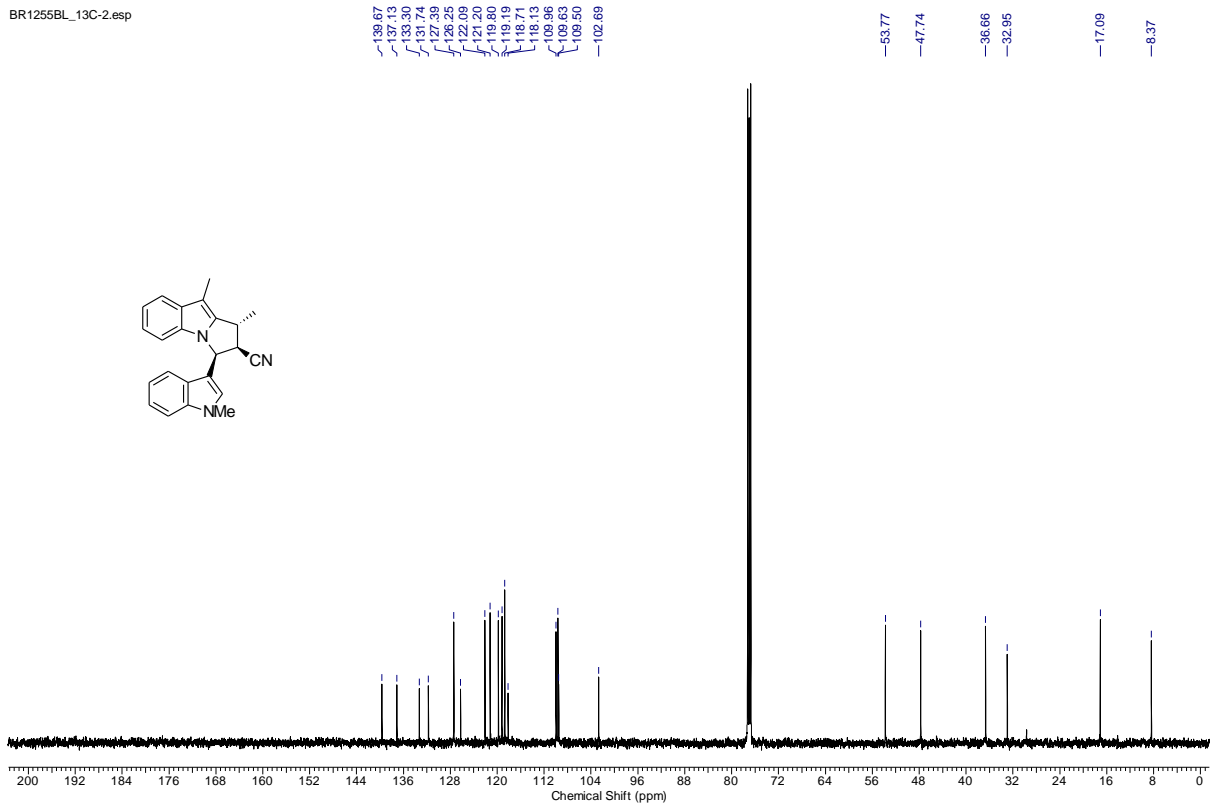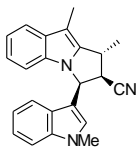

# <sup>1</sup>H and <sup>13</sup>C NMR of compound 10d

BR1255TOP\_PROTON-4.esp

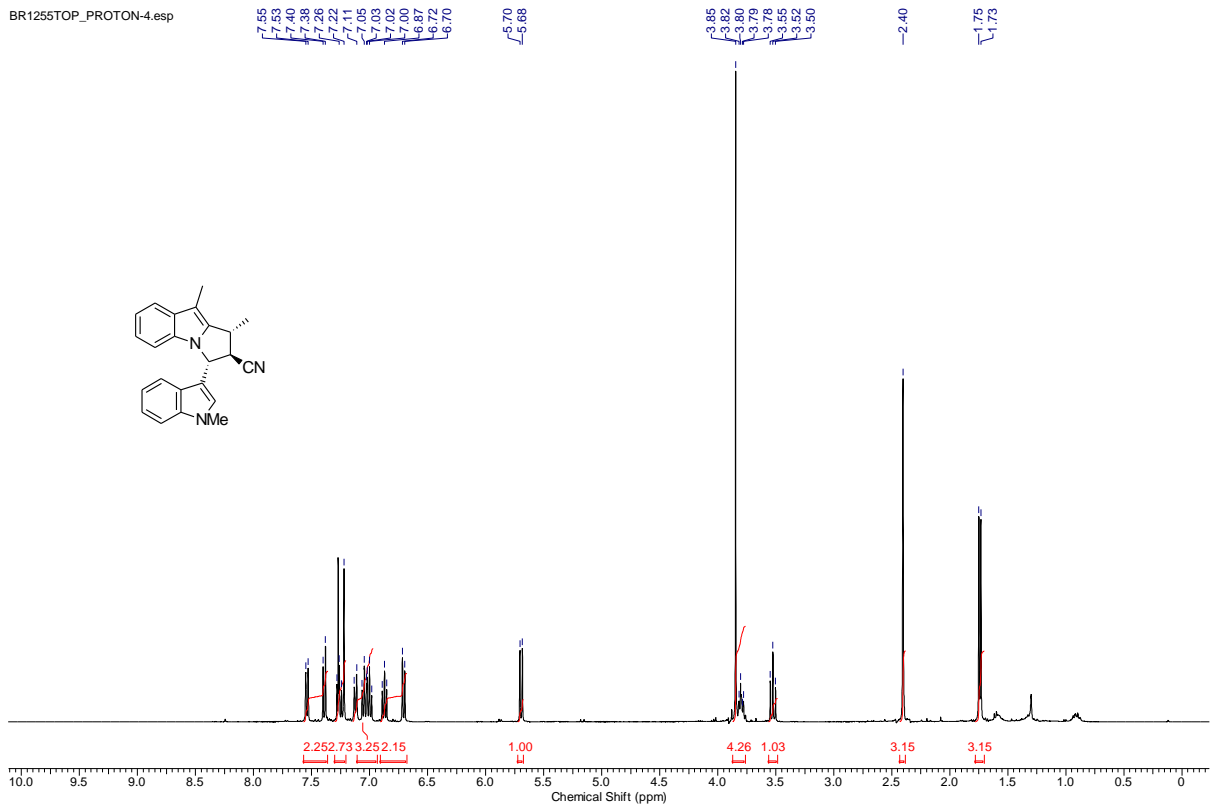

BR1255TOP\_13C-2.esp

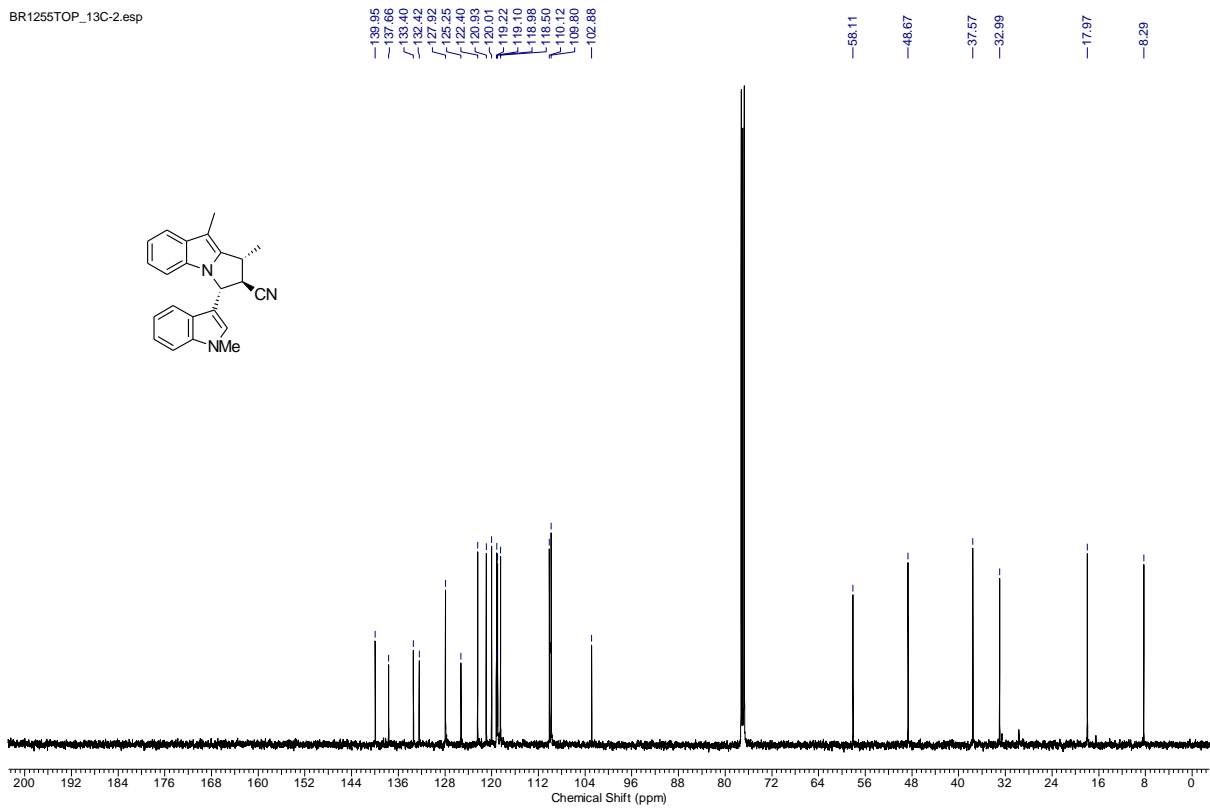

# <sup>1</sup>H and <sup>13</sup>C NMR of compound 10e

BR1253TOP-1H-4.esp

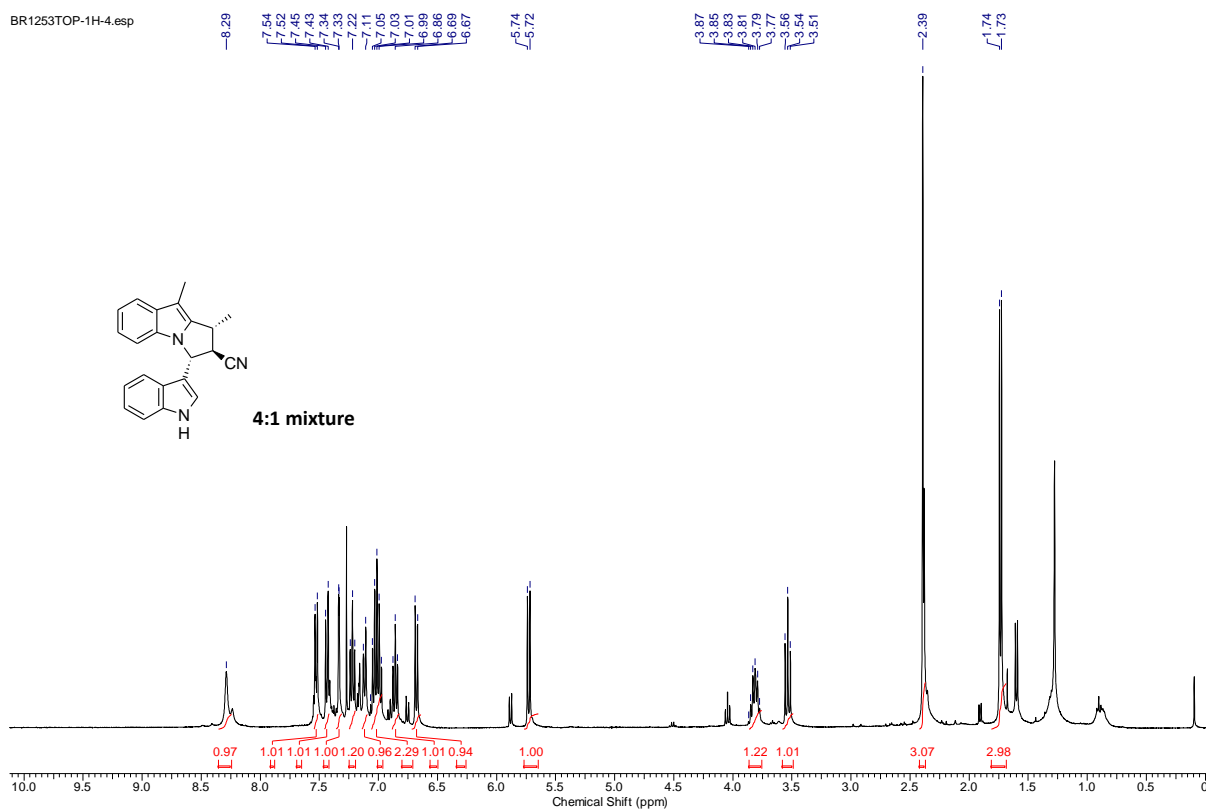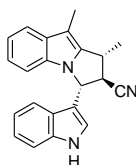

4:1 mixture

BR1253TOP\_13C-3.esp

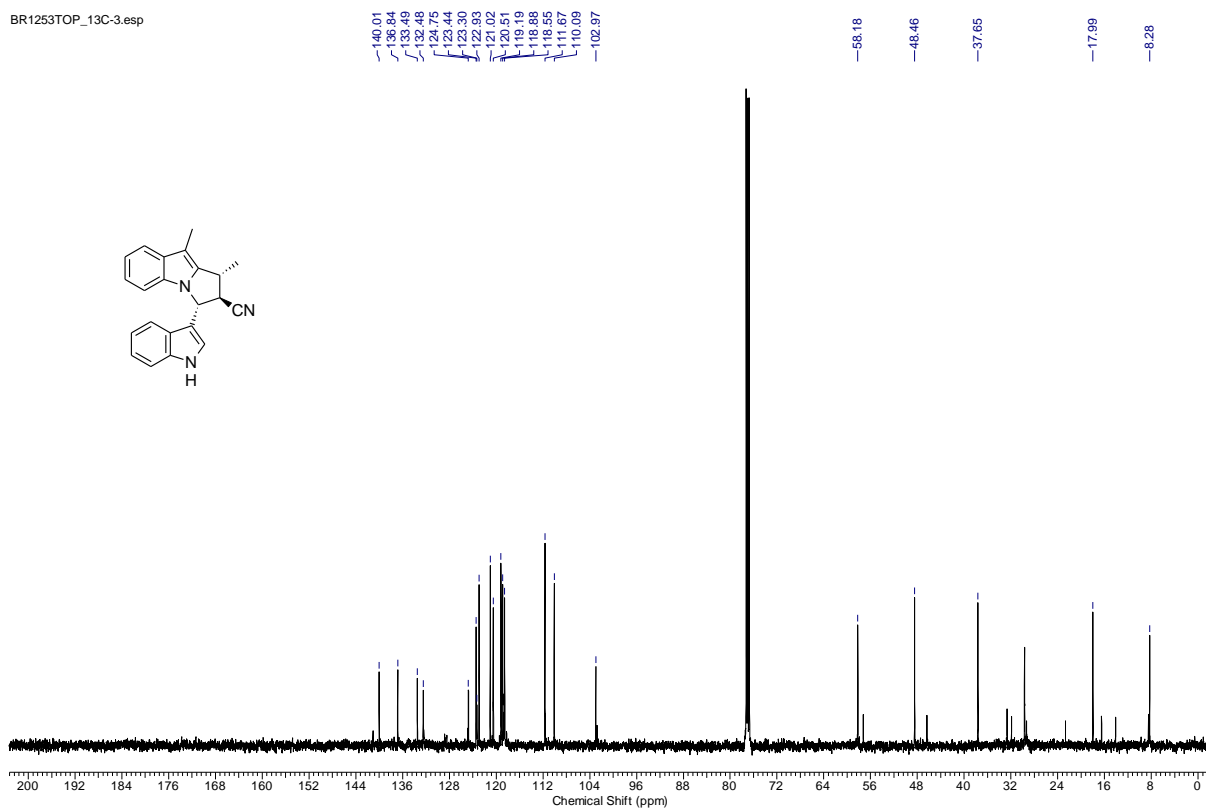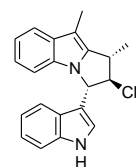

# <sup>1</sup>H and <sup>13</sup>C NMR of compound 12a

BR1716\_1H-1.esp

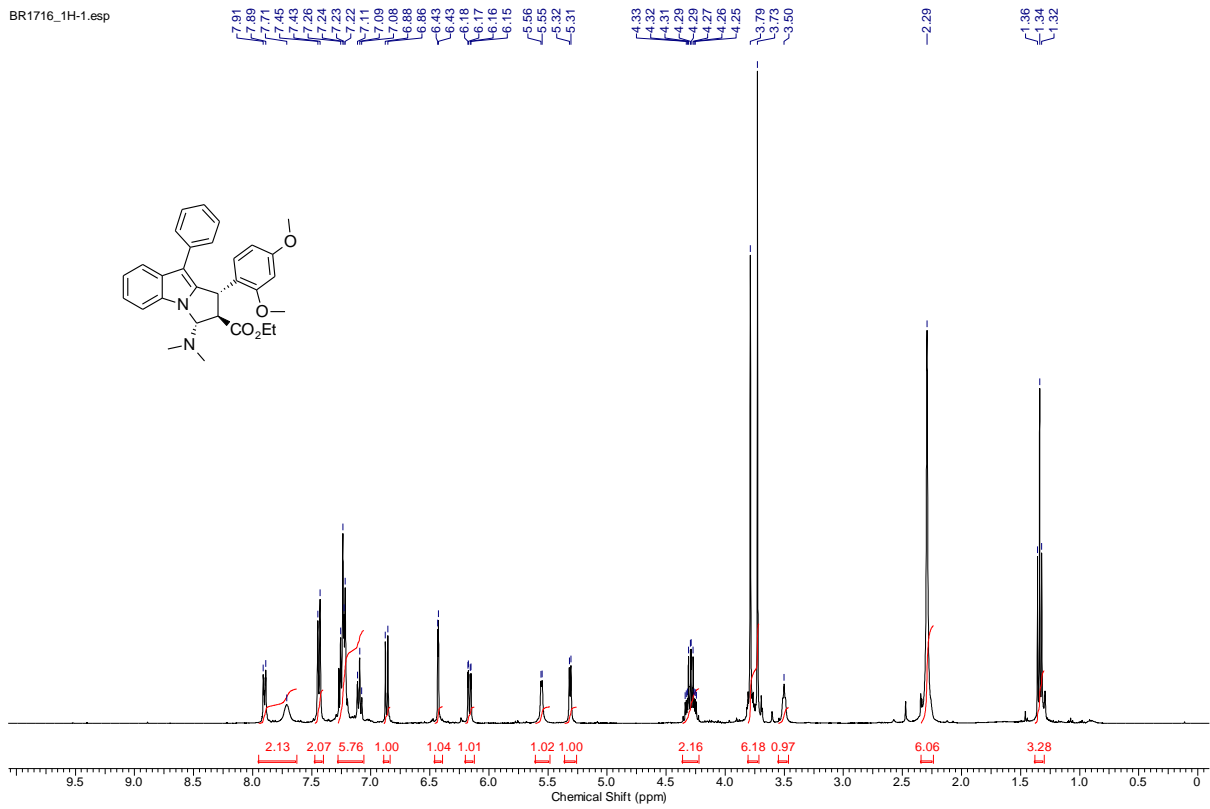

BR1716\_13C-1.esp

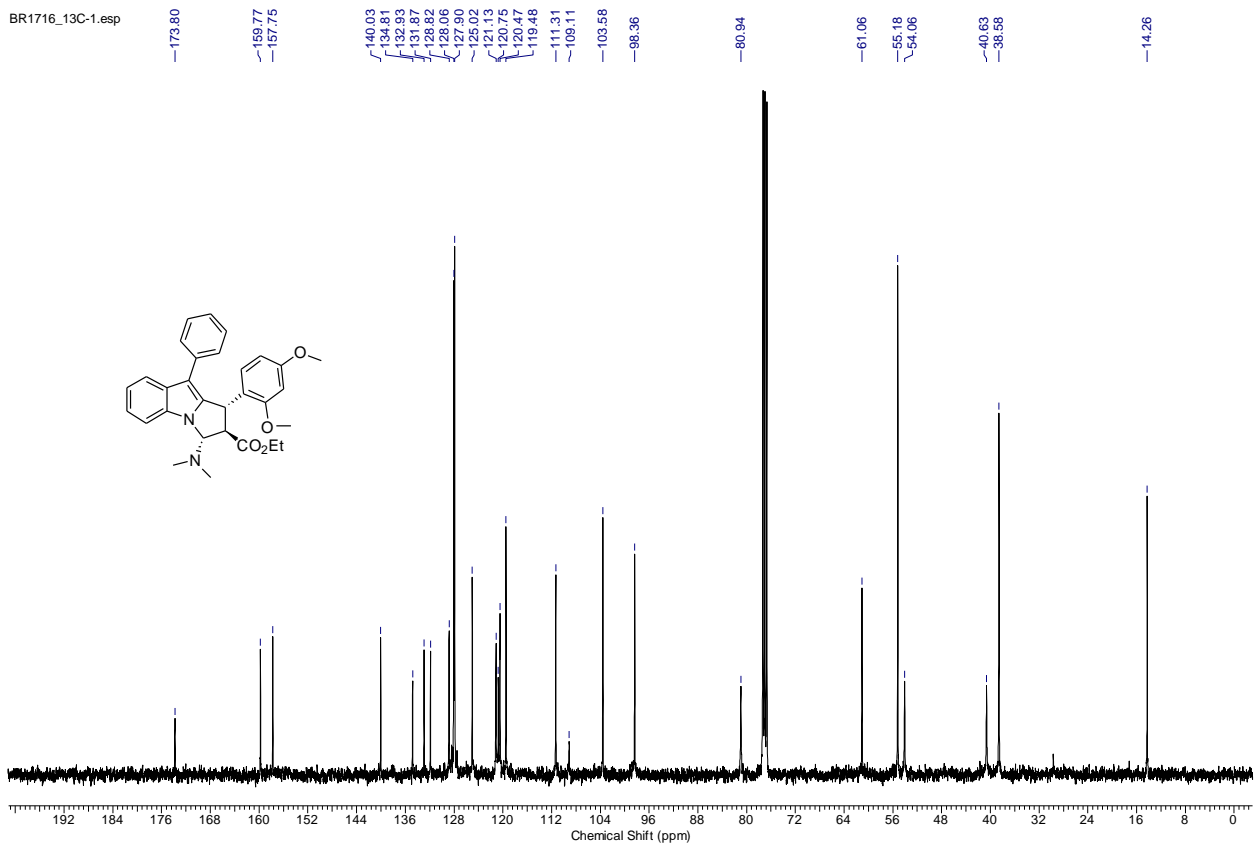

# <sup>1</sup>H and <sup>13</sup>C NMR of compound 12b

BR1700-1H-4.esp

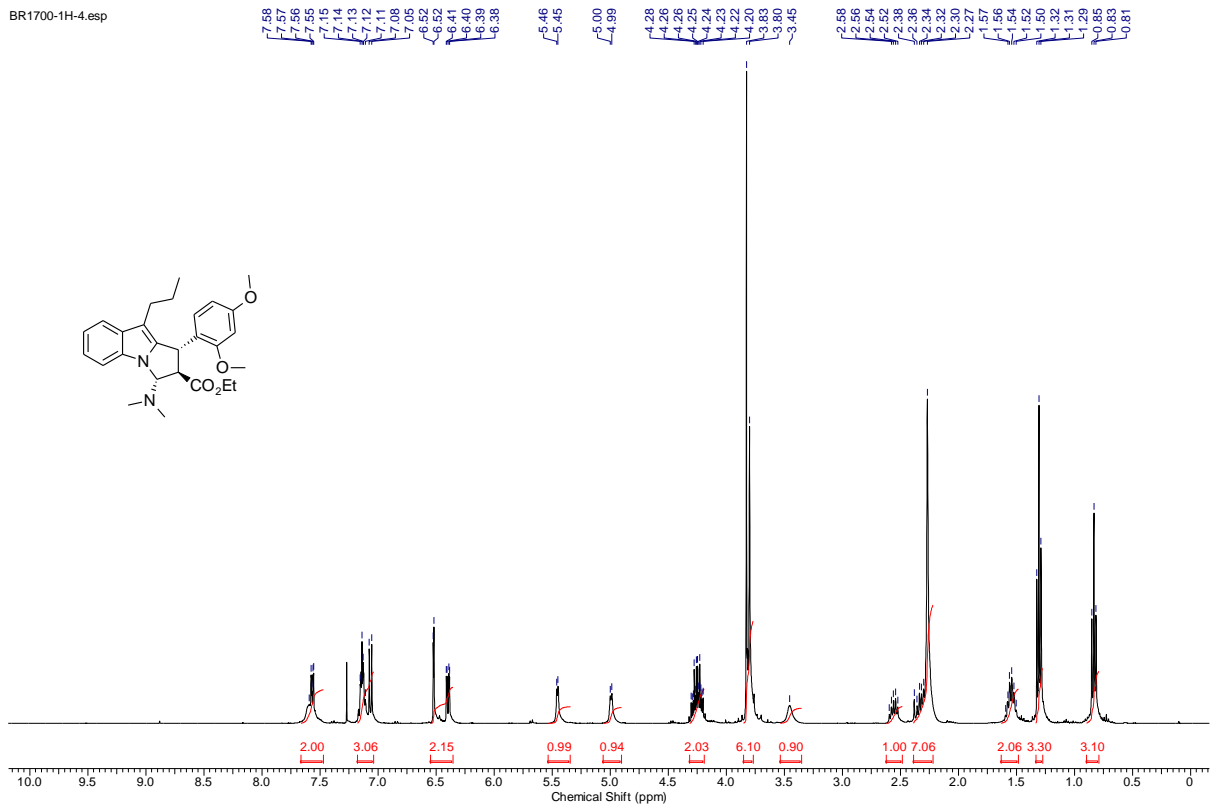

BR1700-13C-3.esp

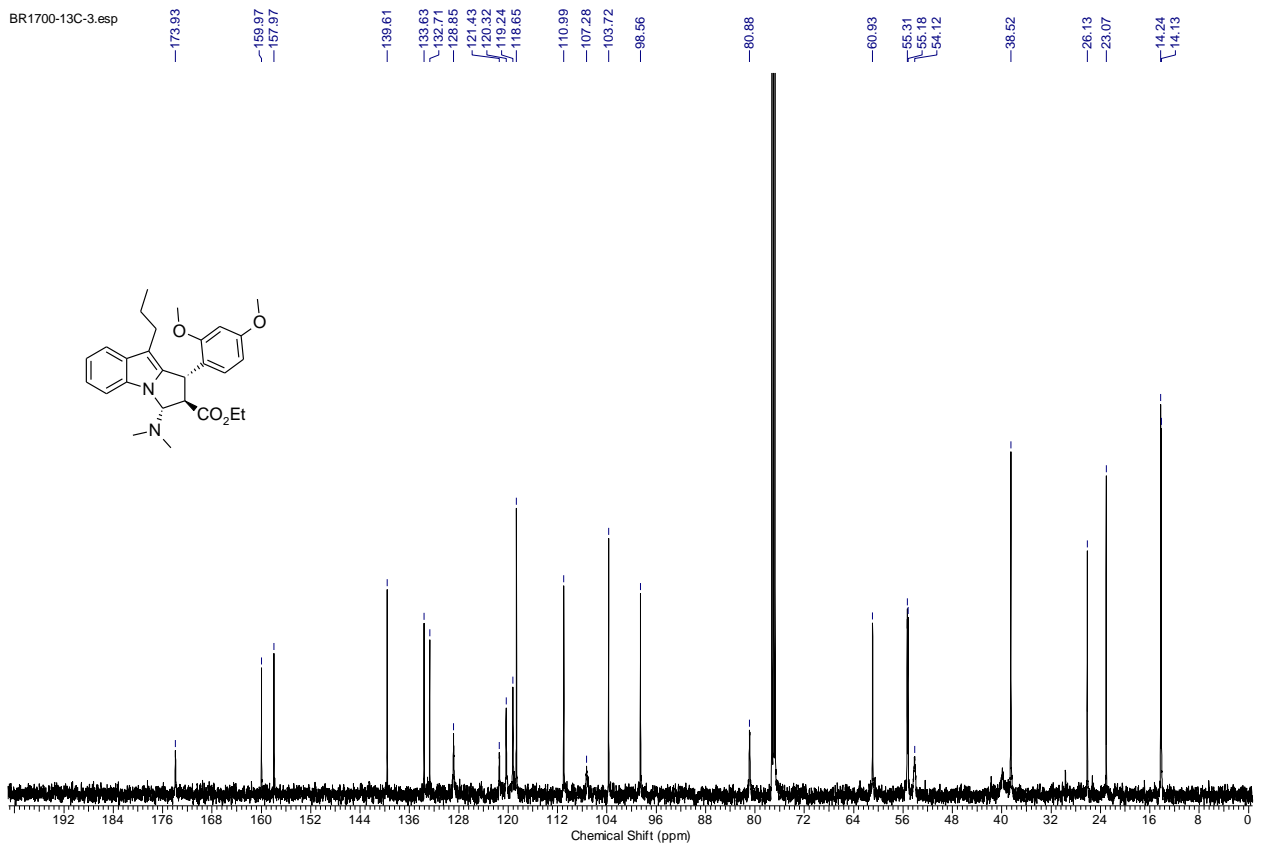

# <sup>1</sup>H and <sup>13</sup>C NMR of compound 12c

BR1683\_1H-2.esp

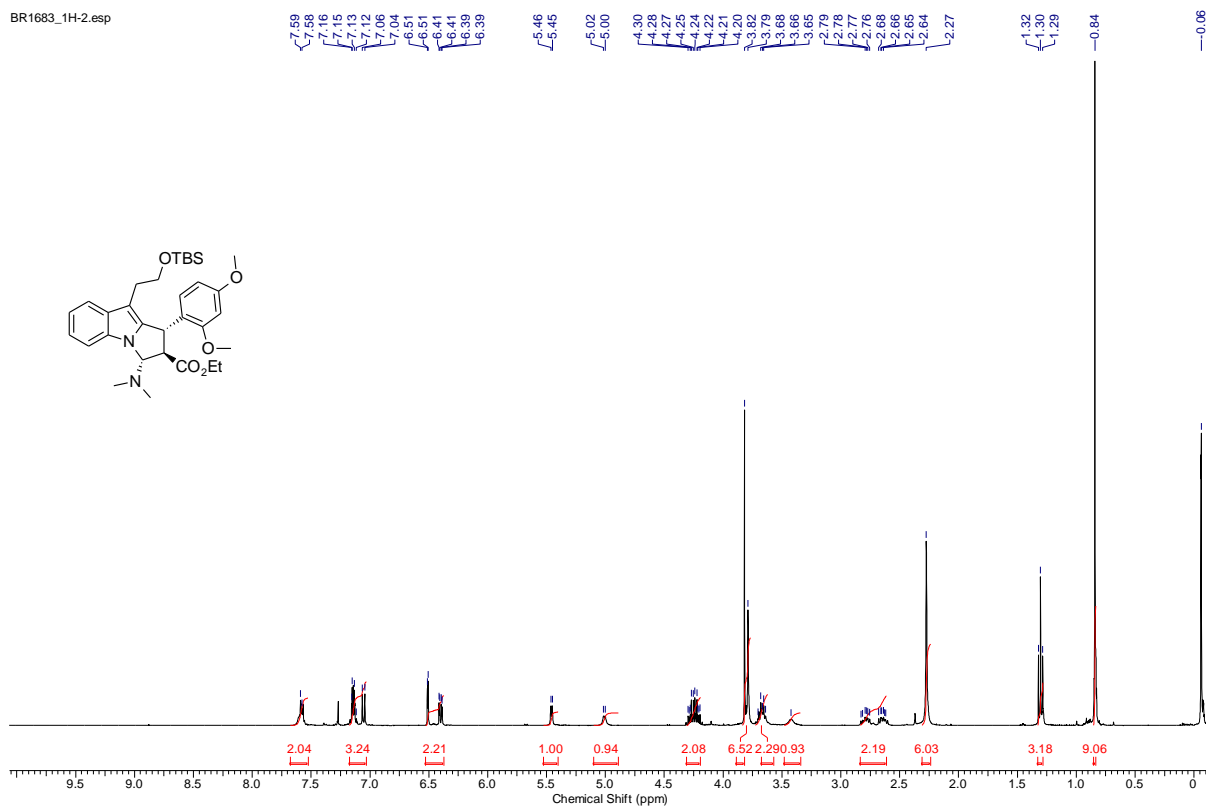

BR1683\_13C-4.esp

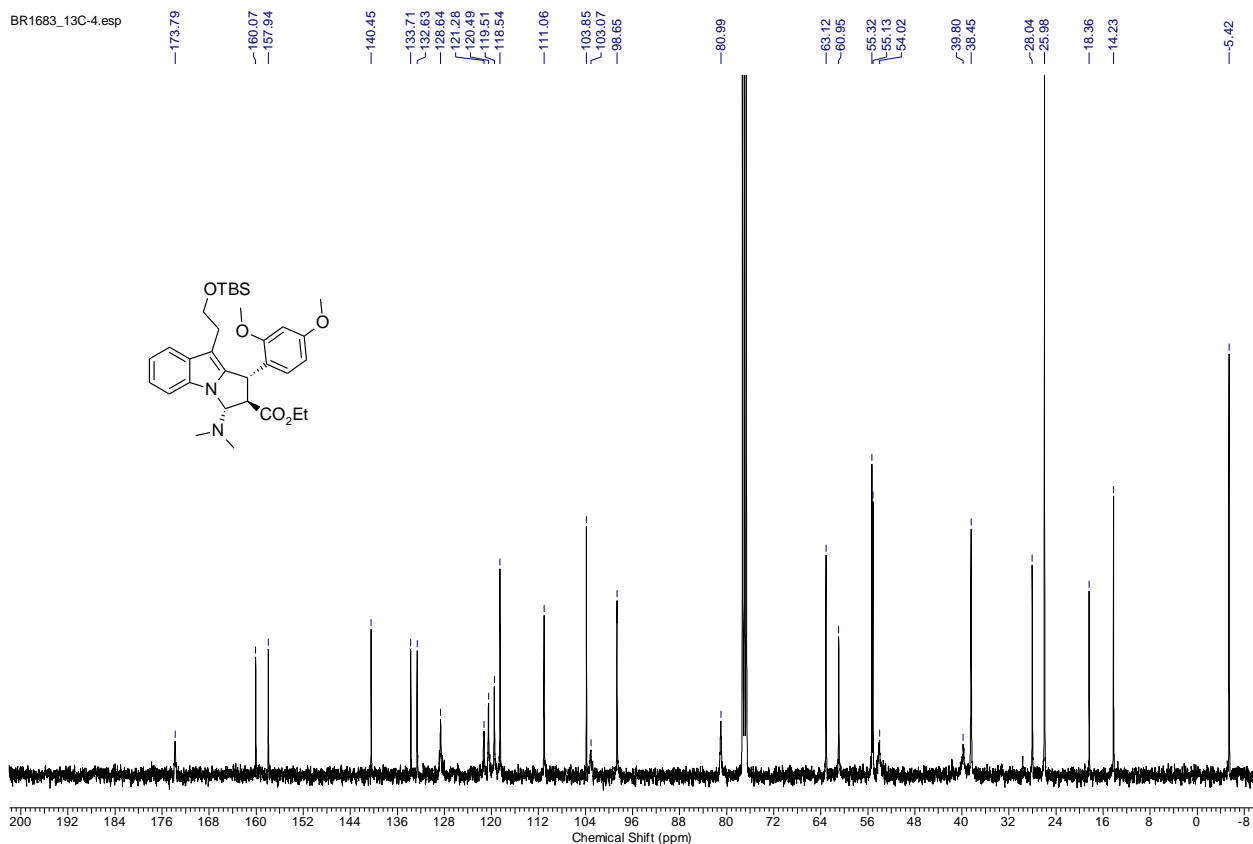



# <sup>1</sup>H and <sup>13</sup>C NMR of compound 12d

BRNME2PTOP\_1H-4.esp

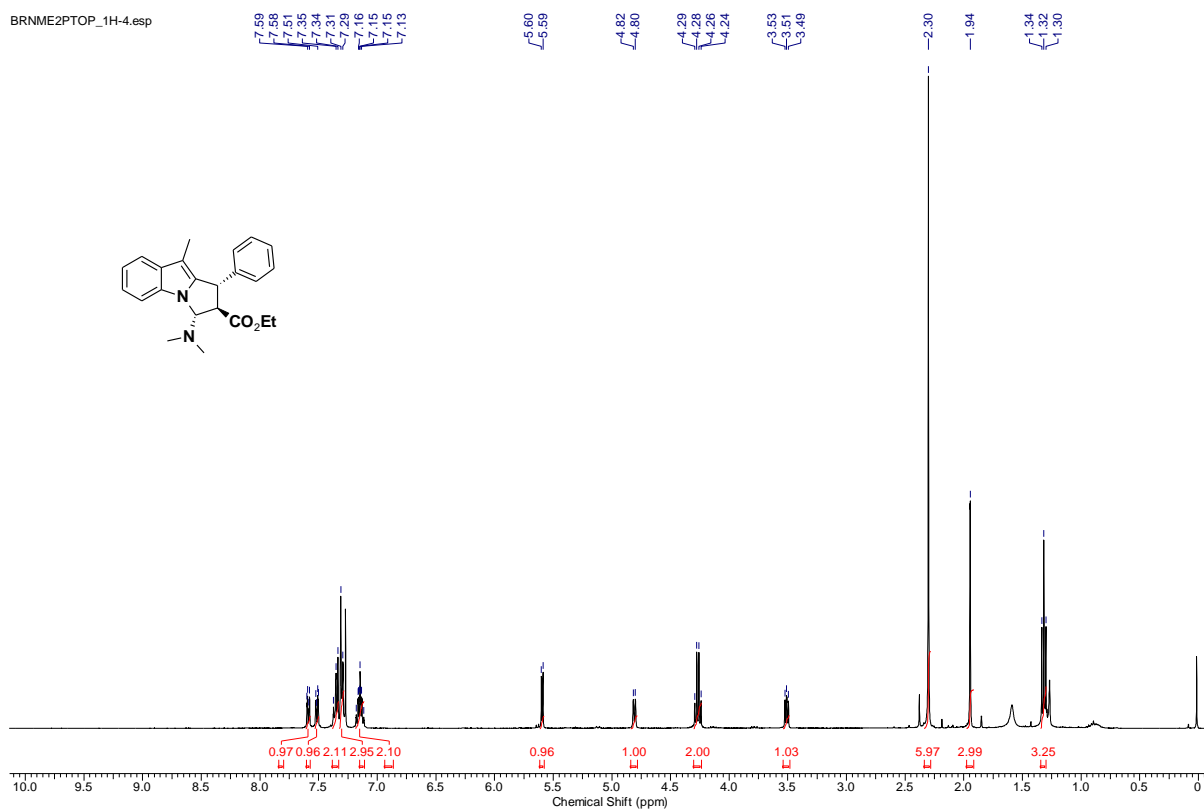

BRNME2PTOP\_13C-3.esp

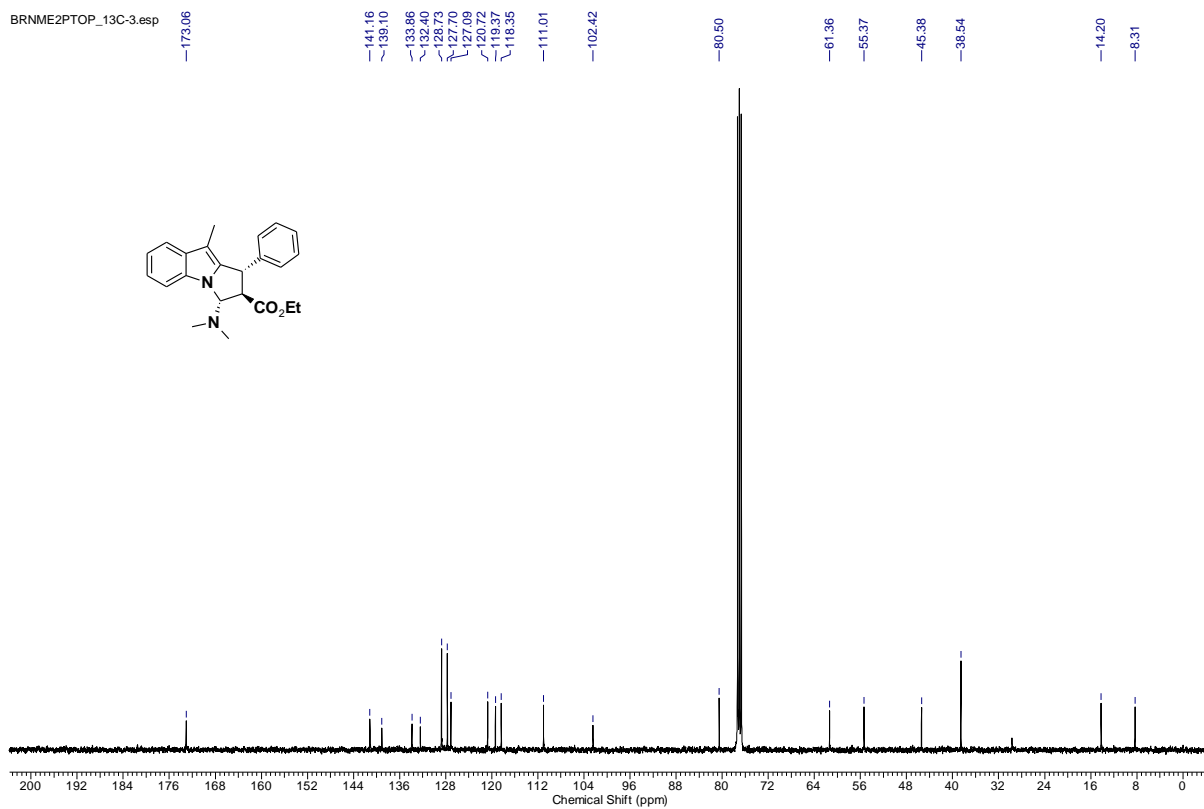

# <sup>1</sup>H and <sup>13</sup>C NMR of compound 14a

BR1676BEL\_1H-1.esp

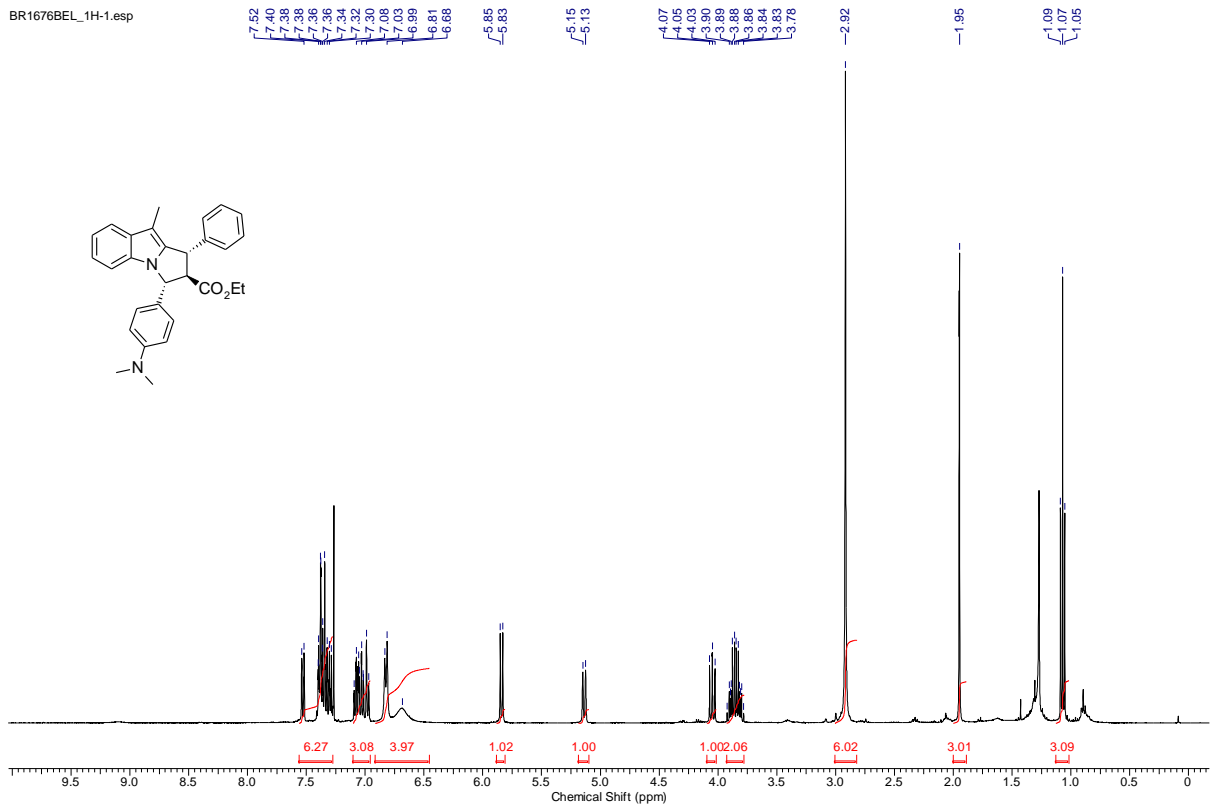

BR1676BEL\_13C-3.esp

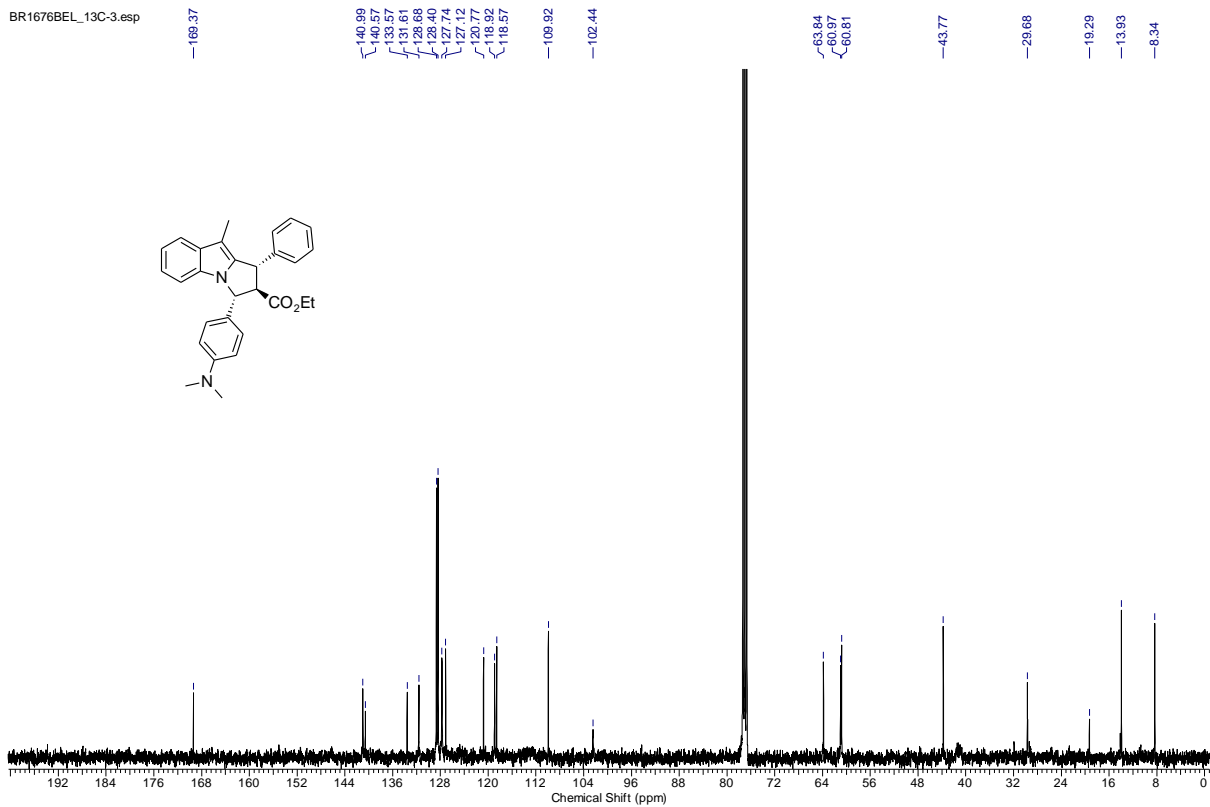

# <sup>1</sup>H and <sup>13</sup>C NMR of compound 14b

BR1684PREP\_1H-1.esp

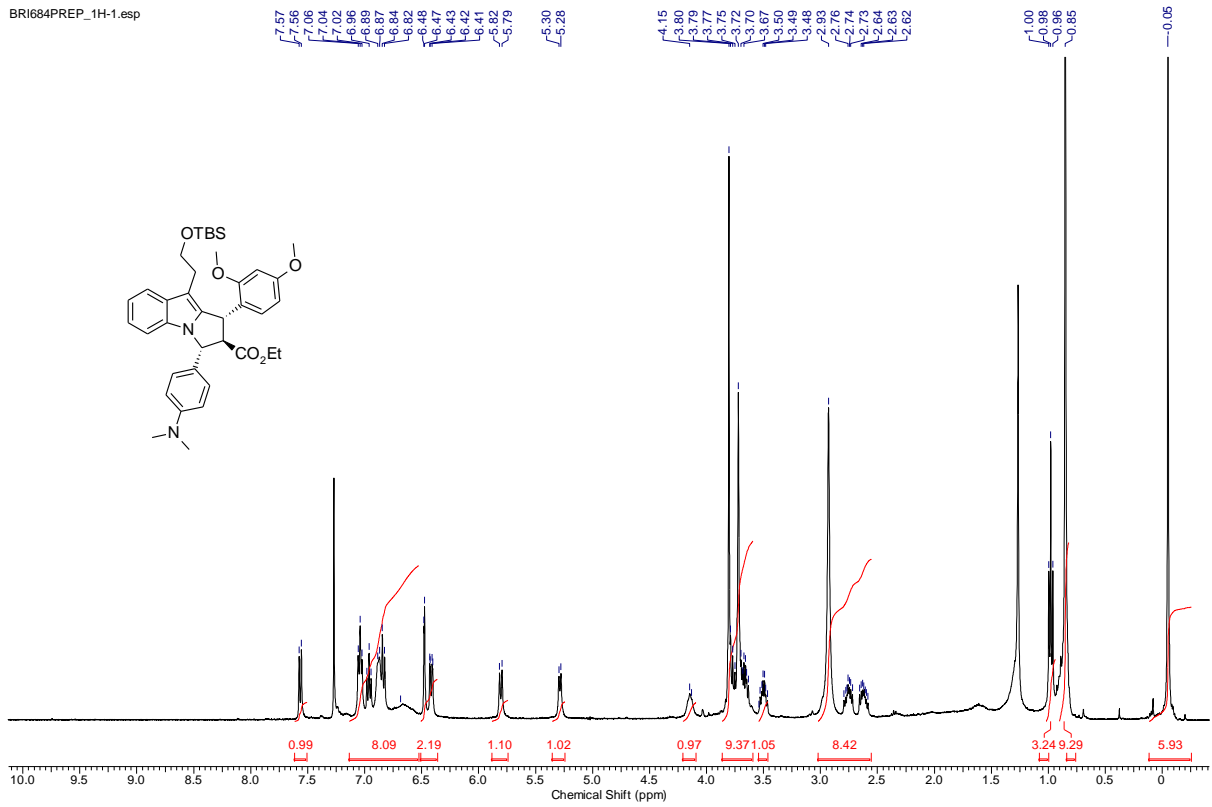

BR1684PREP\_13C-1.esp

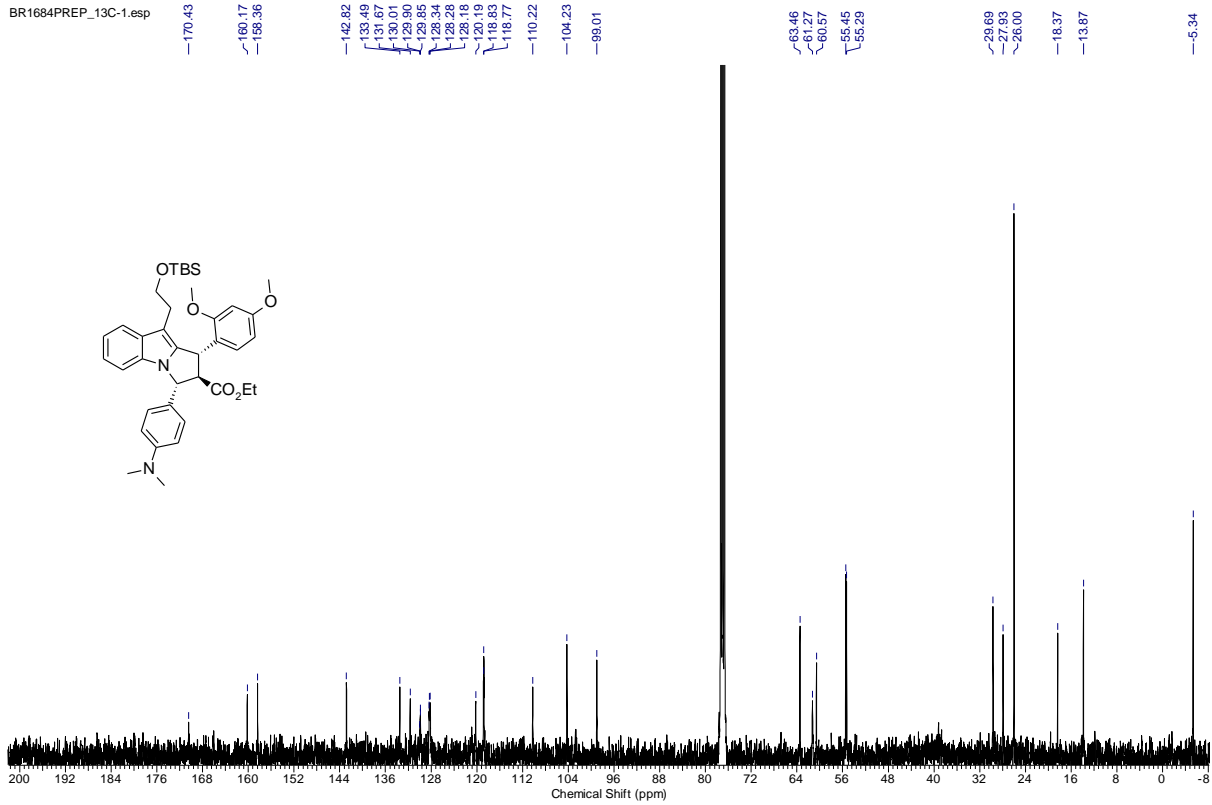

# <sup>1</sup>H and <sup>13</sup>C NMR of compound 14c

BR1695BEL-1H-2.esp

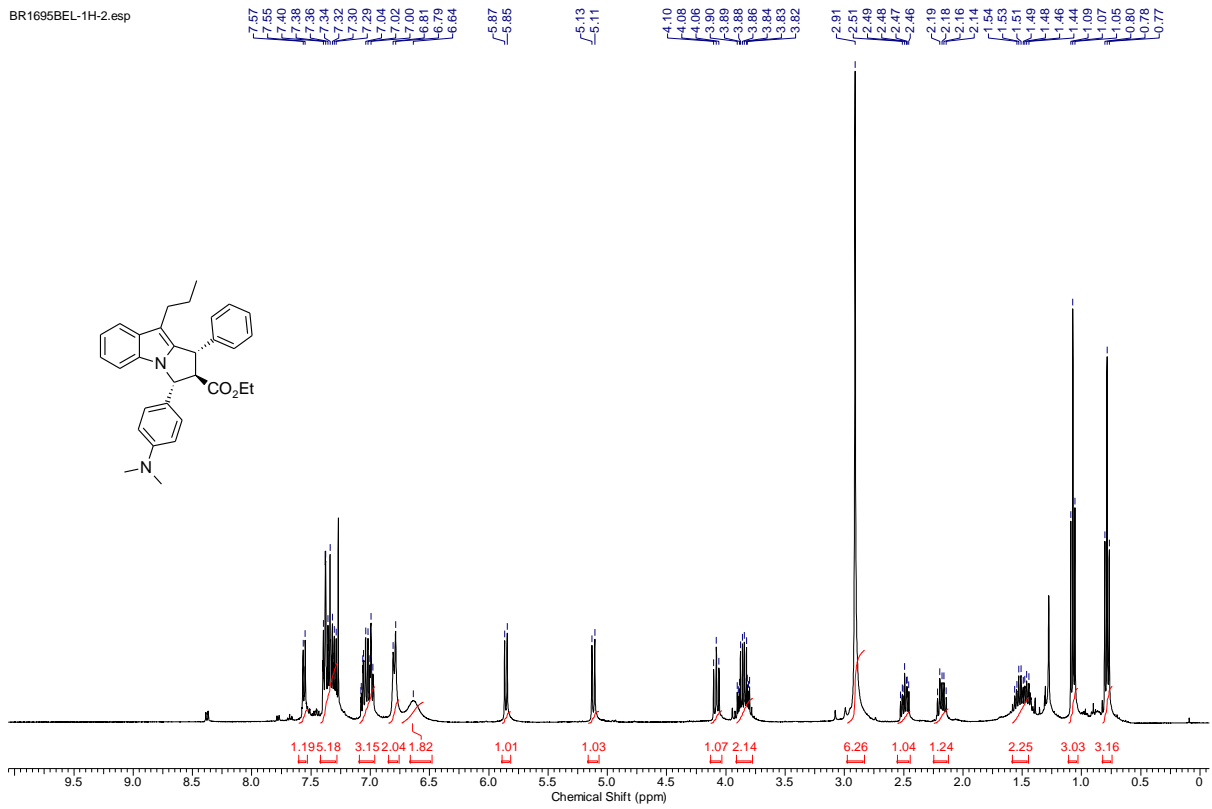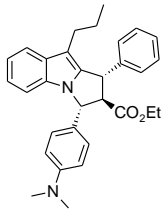

BR1695BEL\_13C-1.esp

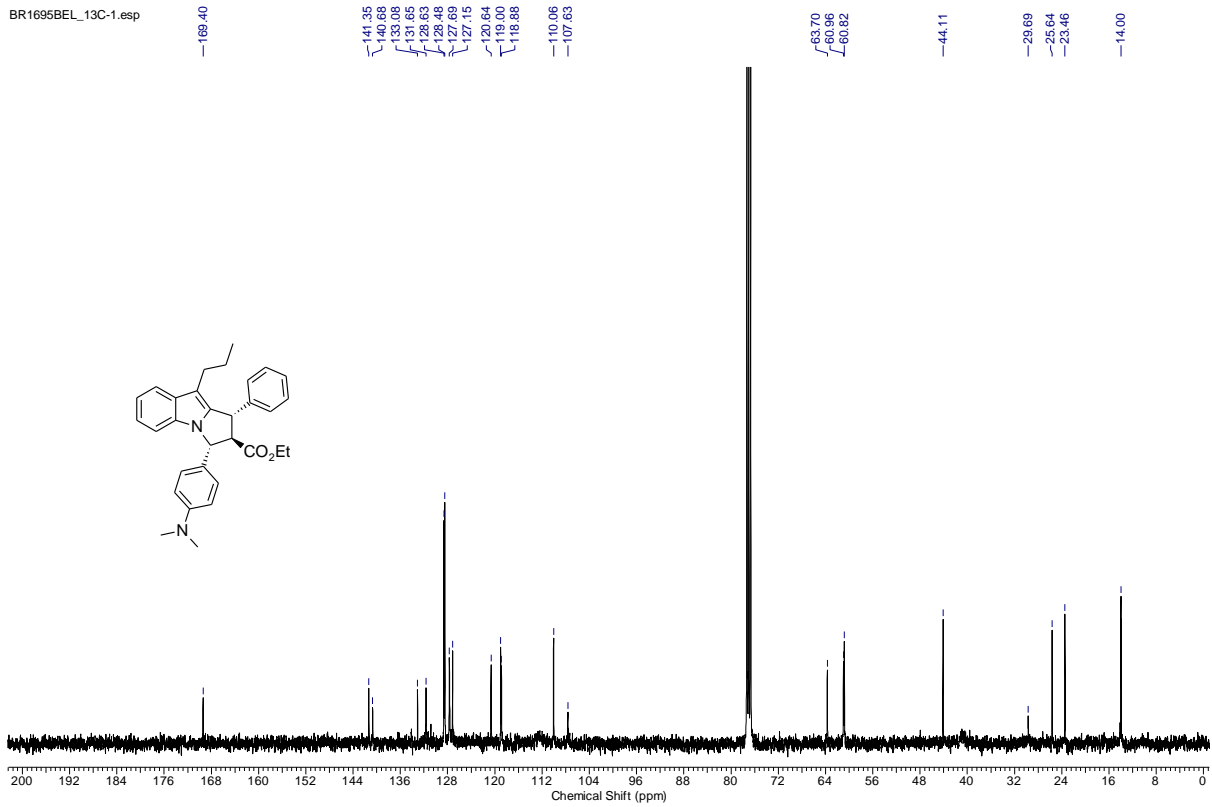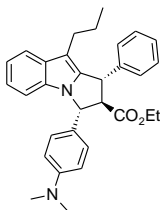

# <sup>1</sup>H and <sup>13</sup>C NMR of compound 14d

BR1710PREP\_1H-2.esp

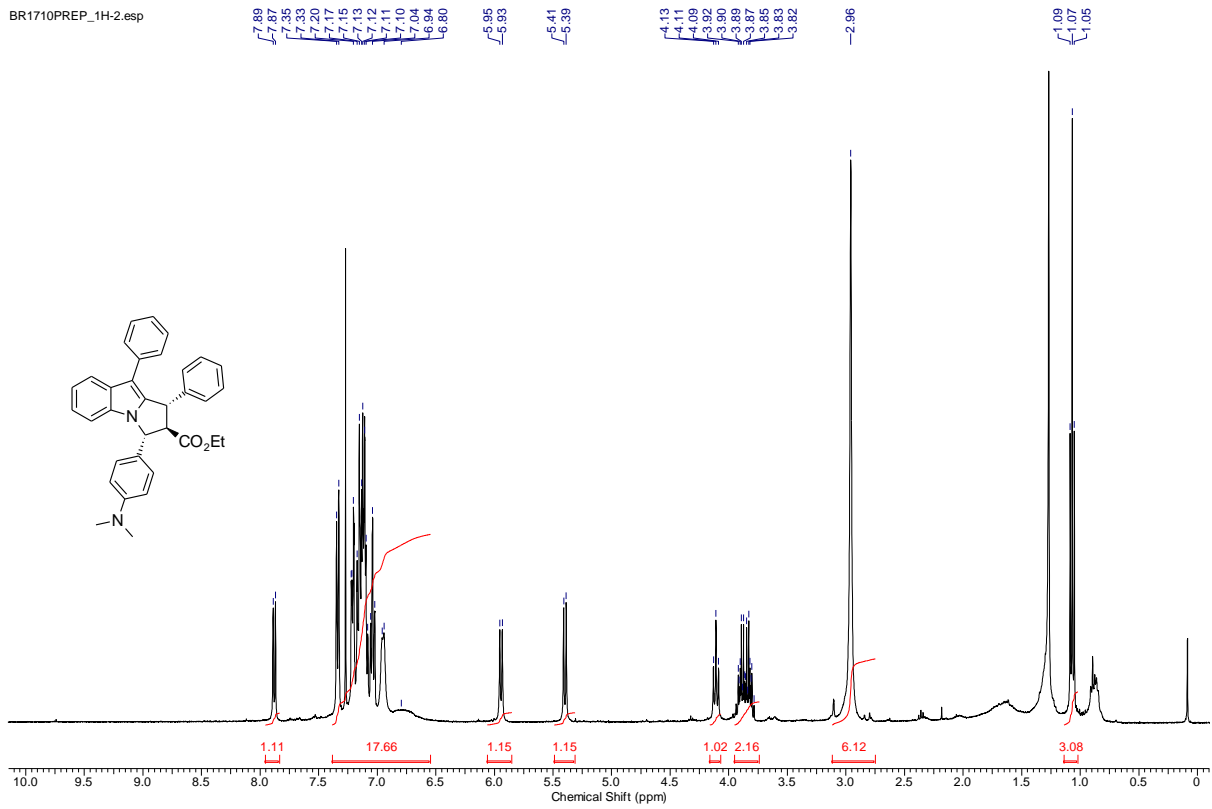

BR1710PREP\_13C-4.esp

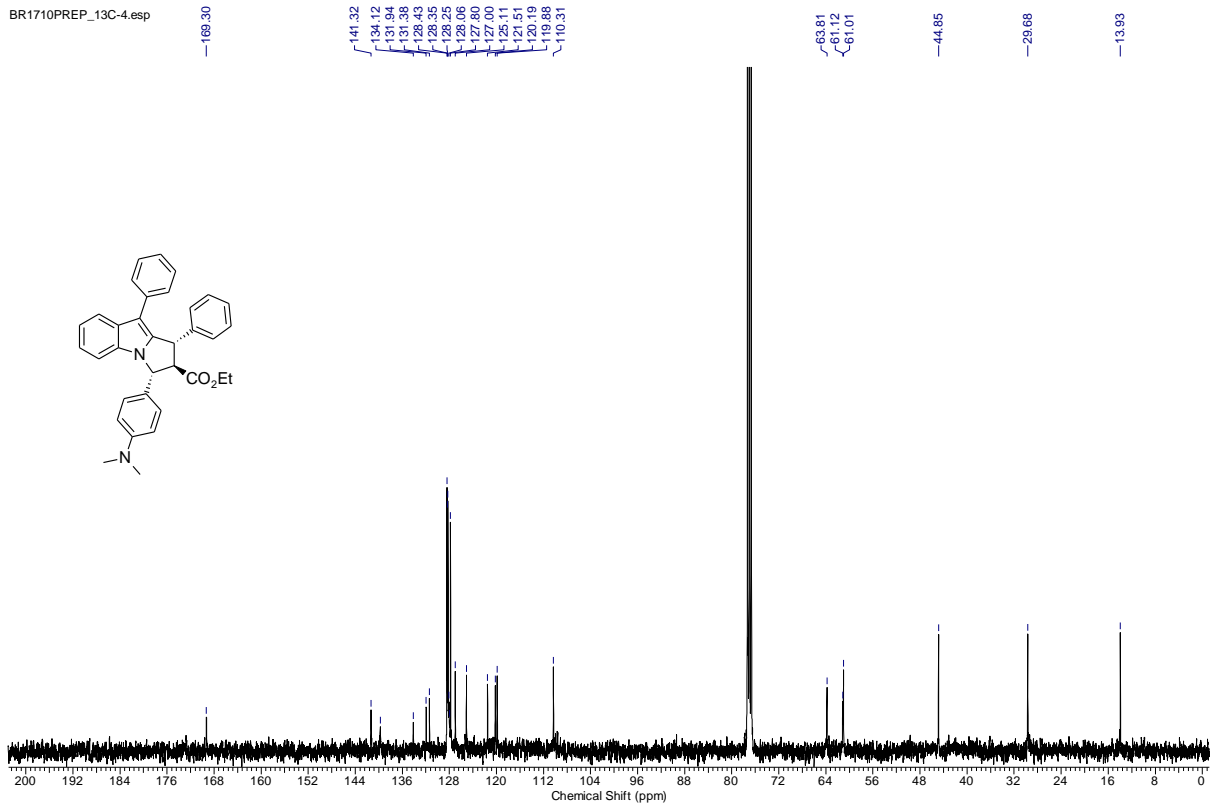

# <sup>1</sup>H and <sup>13</sup>C NMR of compound 14e

BR1717BEL\_1H-1.esp

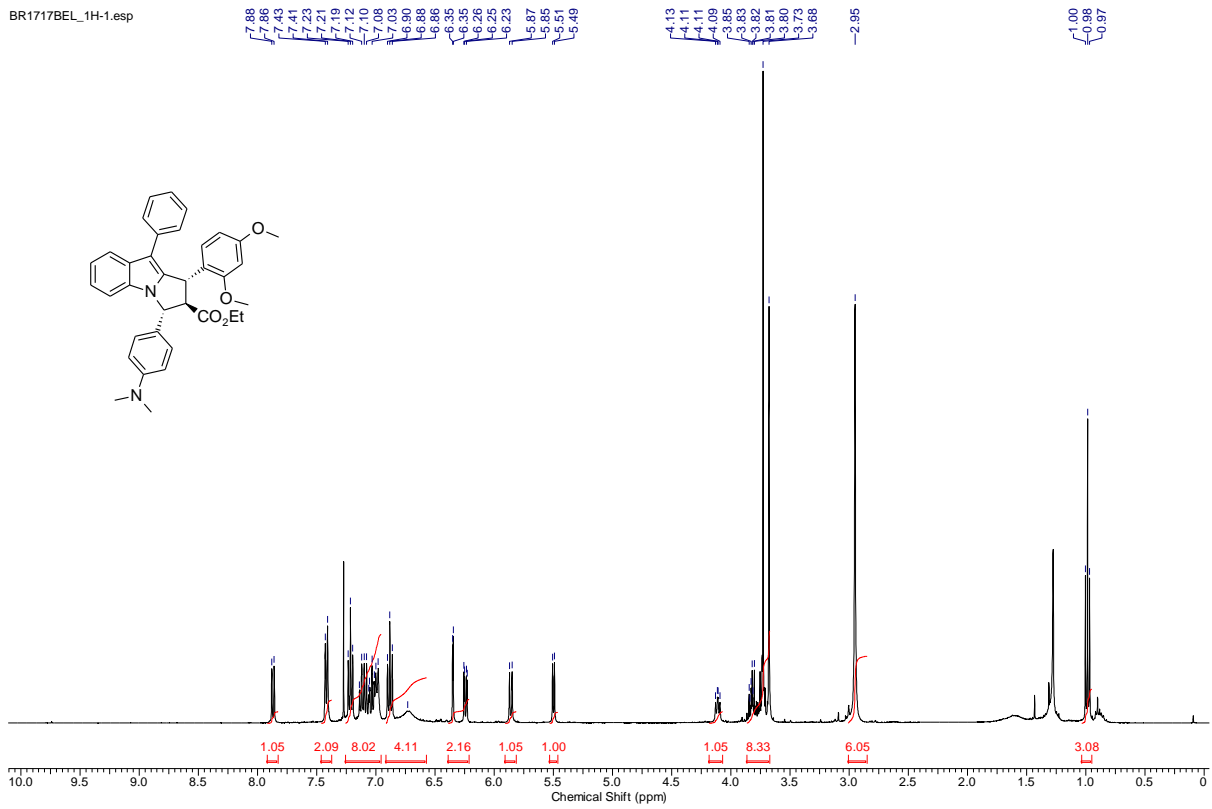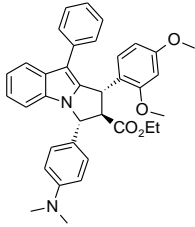

BR1717BEL\_13C-1.esp

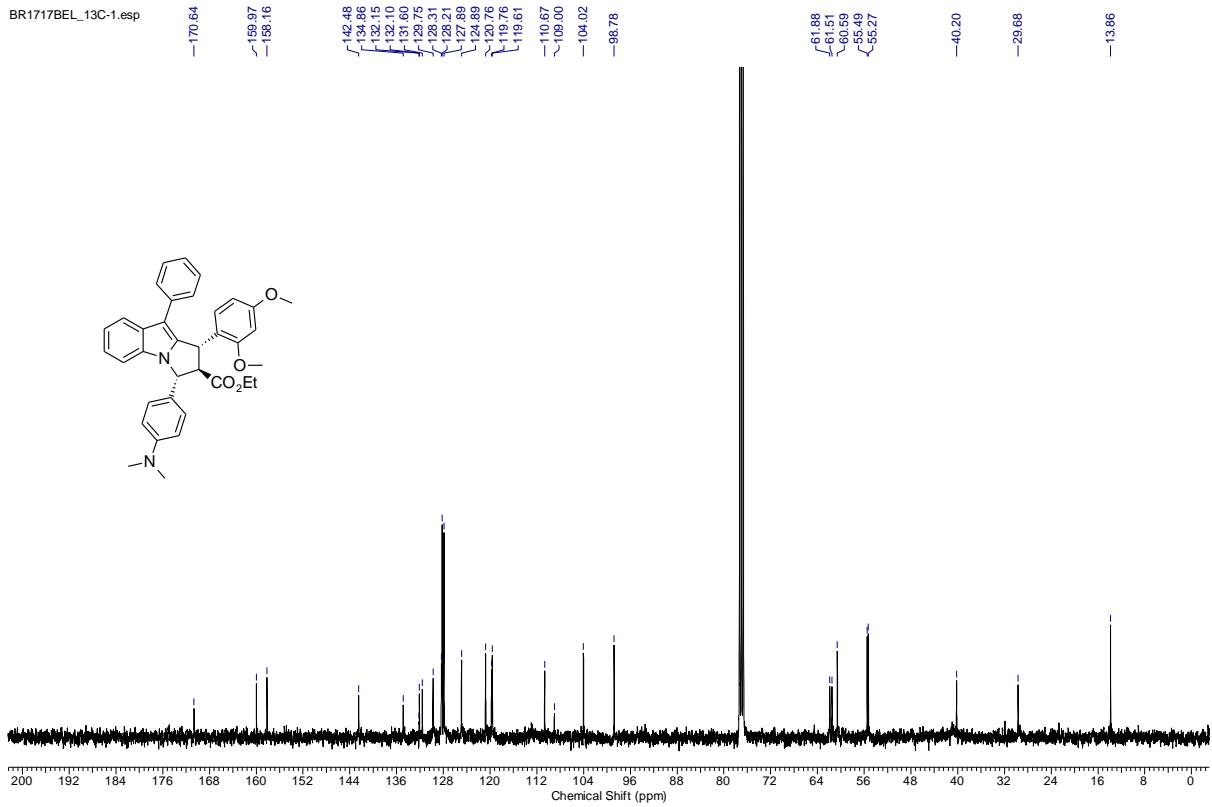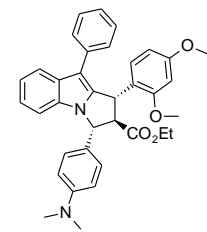

# <sup>1</sup>H and <sup>13</sup>C NMR of compound 15b

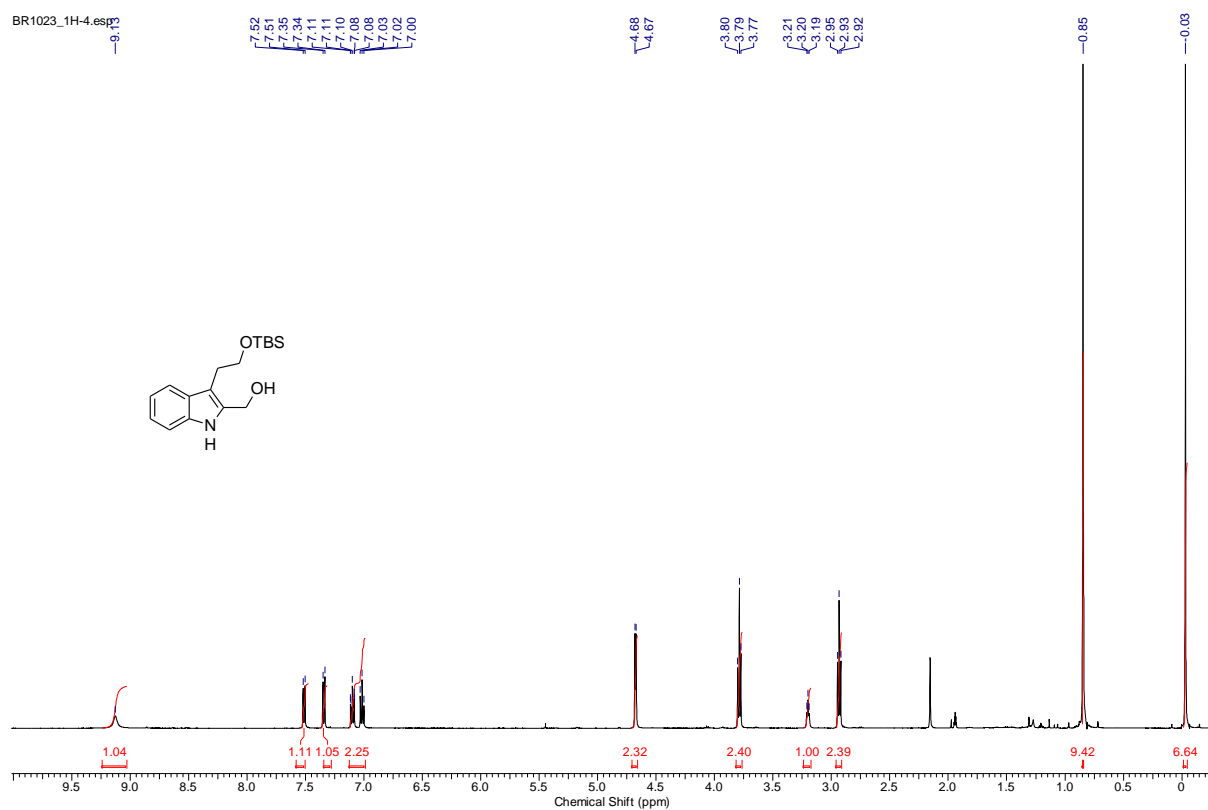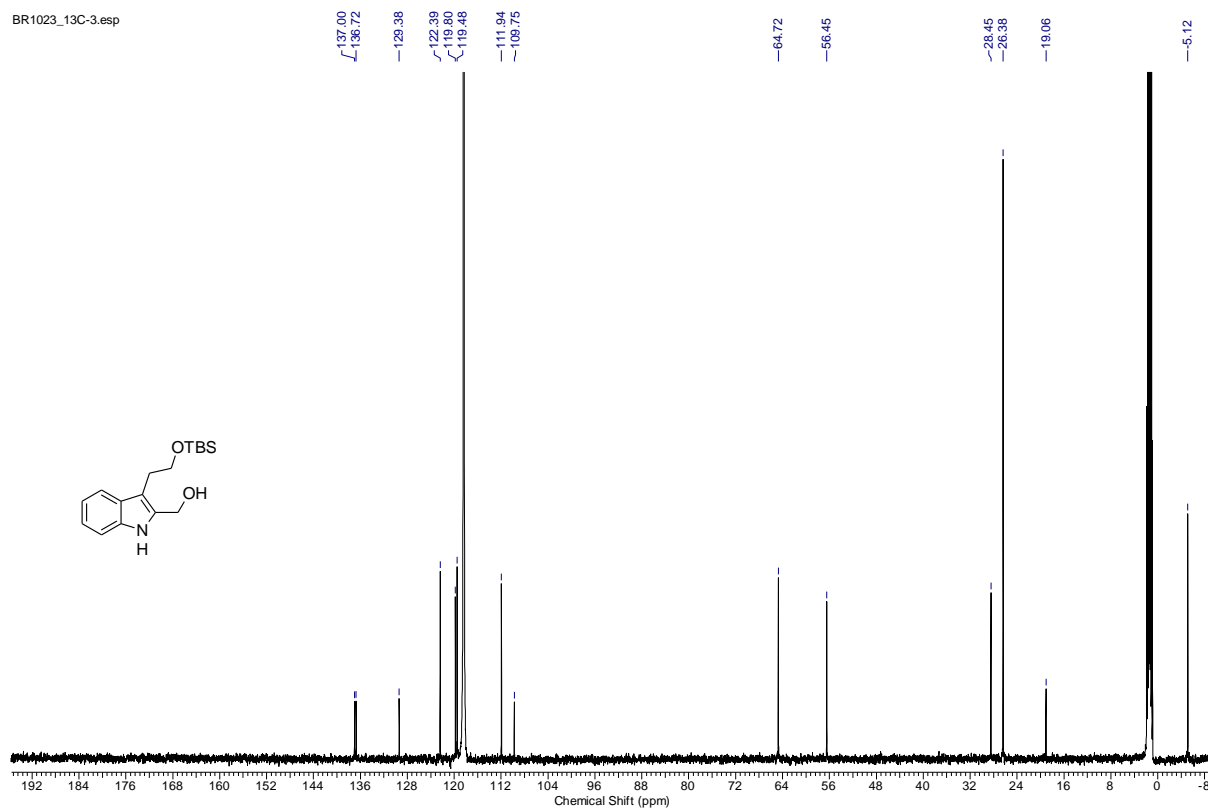

# <sup>1</sup>H and <sup>13</sup>C NMR of compound 15c

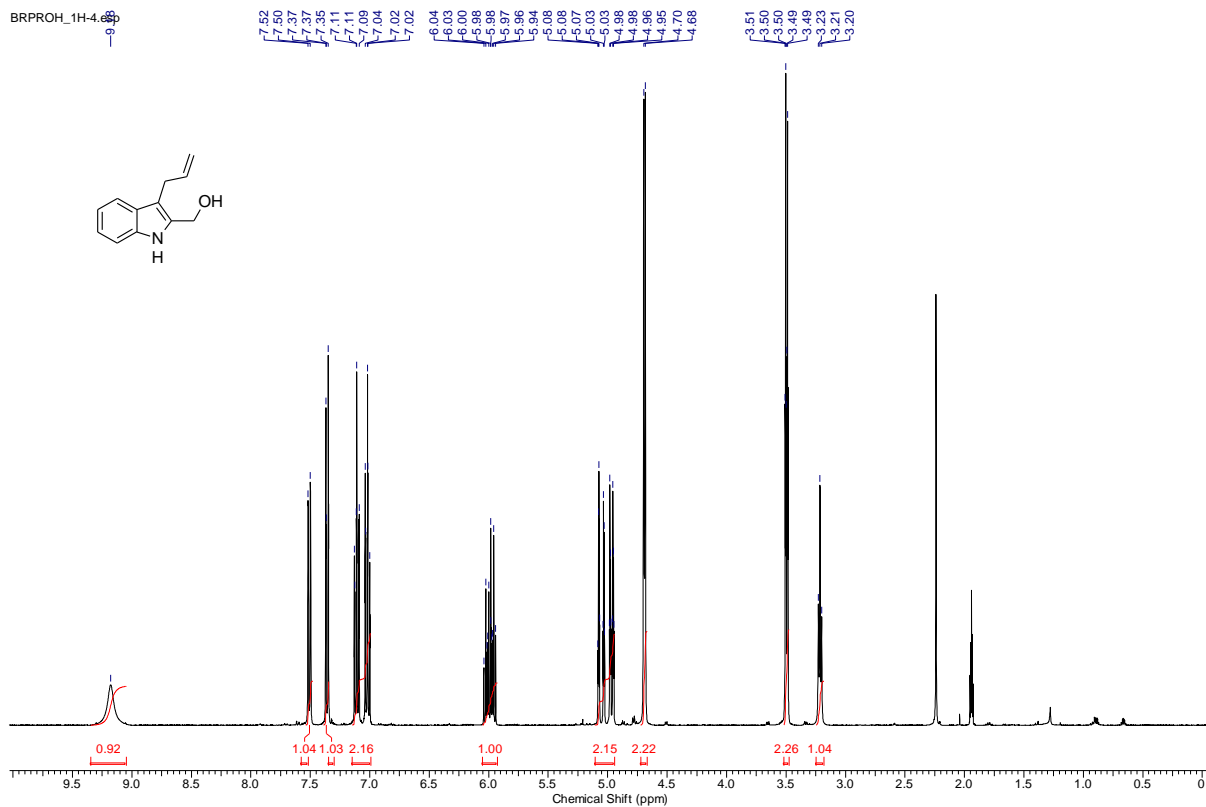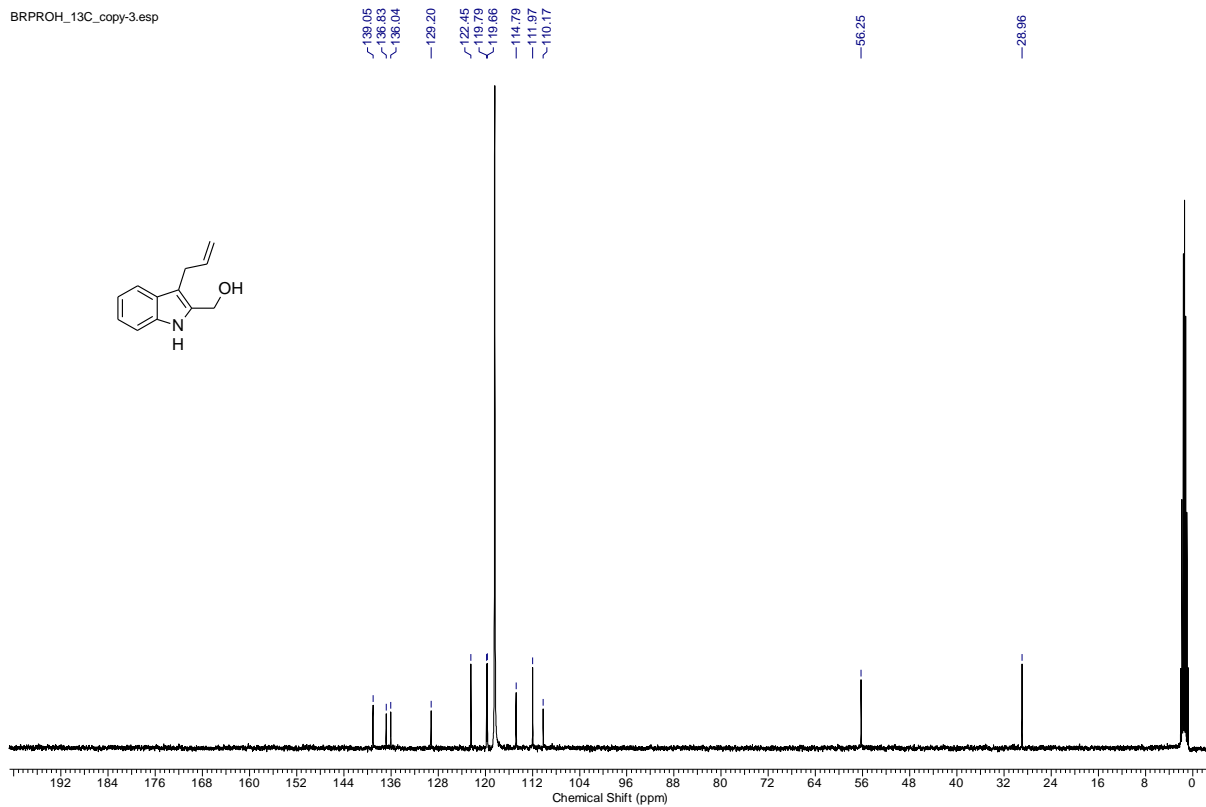



# <sup>1</sup>H and <sup>13</sup>C NMR of compound 16a

BR996\_PROTON-4.esp

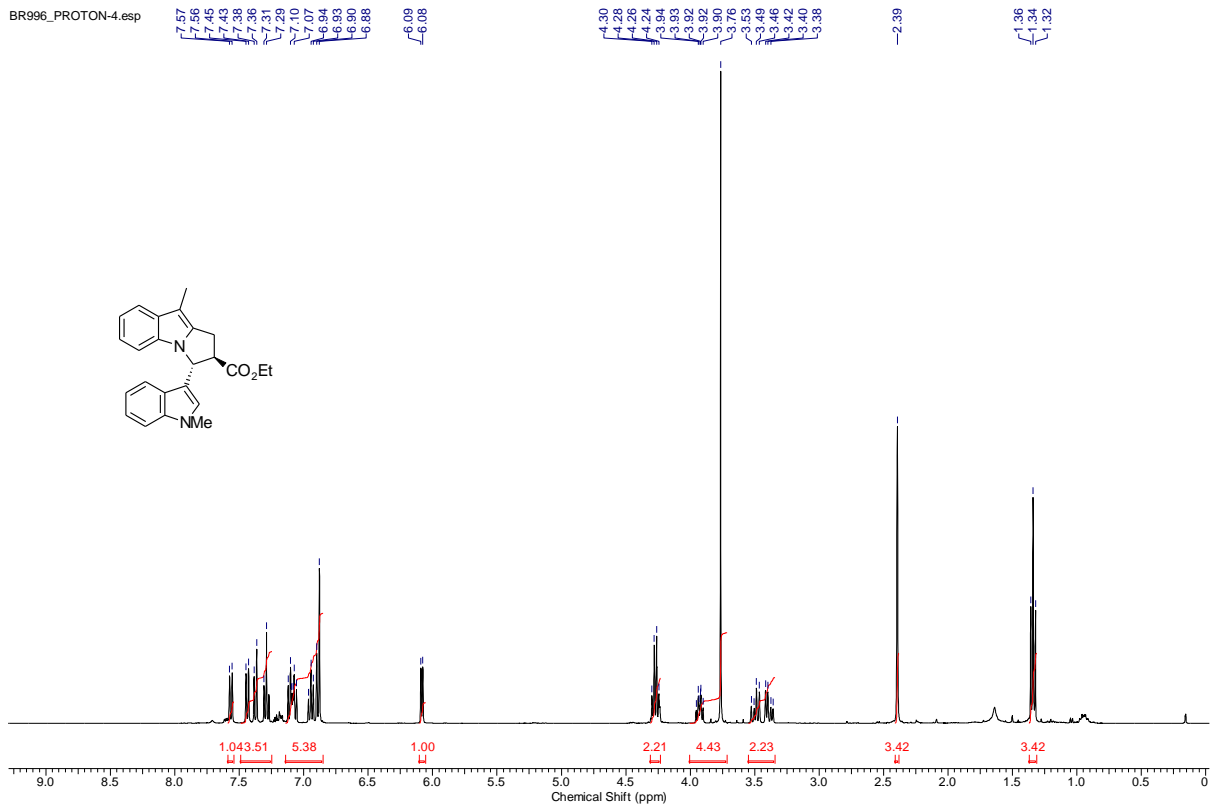

BR996\_13C-2.esp

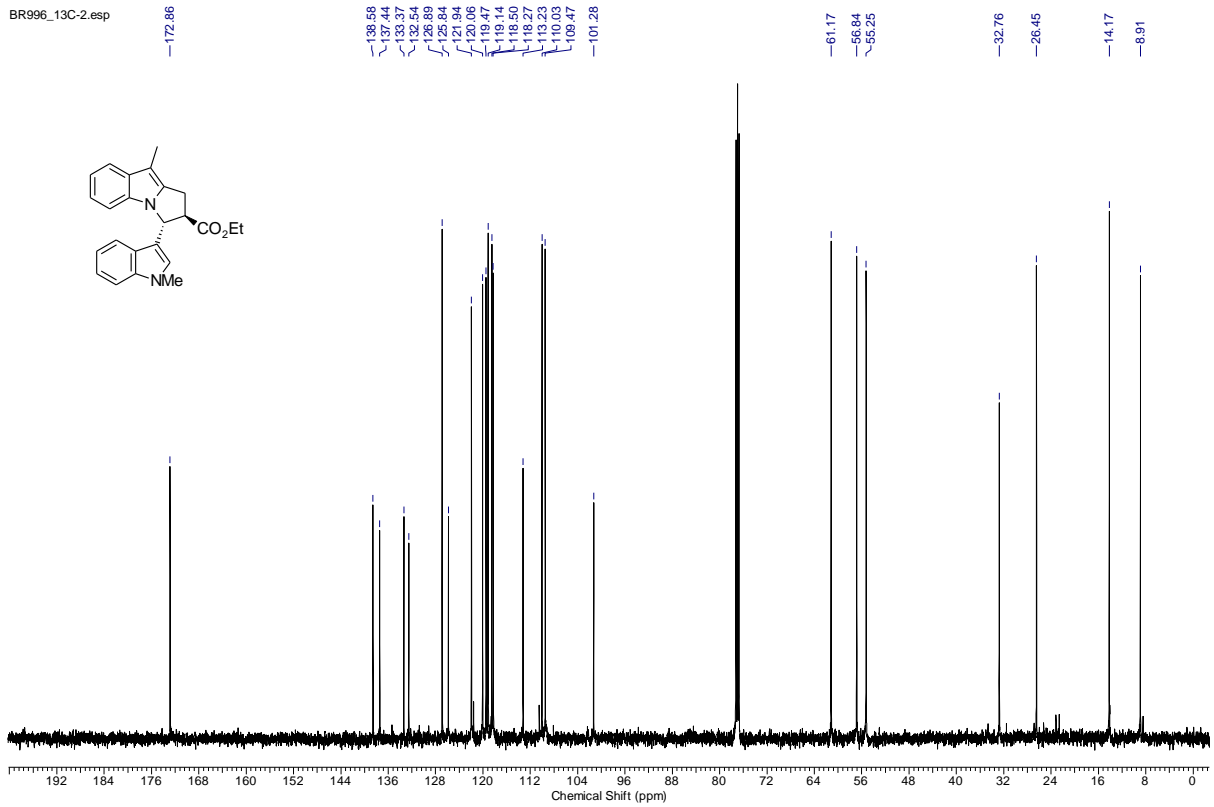

# <sup>1</sup>H and <sup>13</sup>C NMR of compound 16b

BR997\_PROTON-4.esp

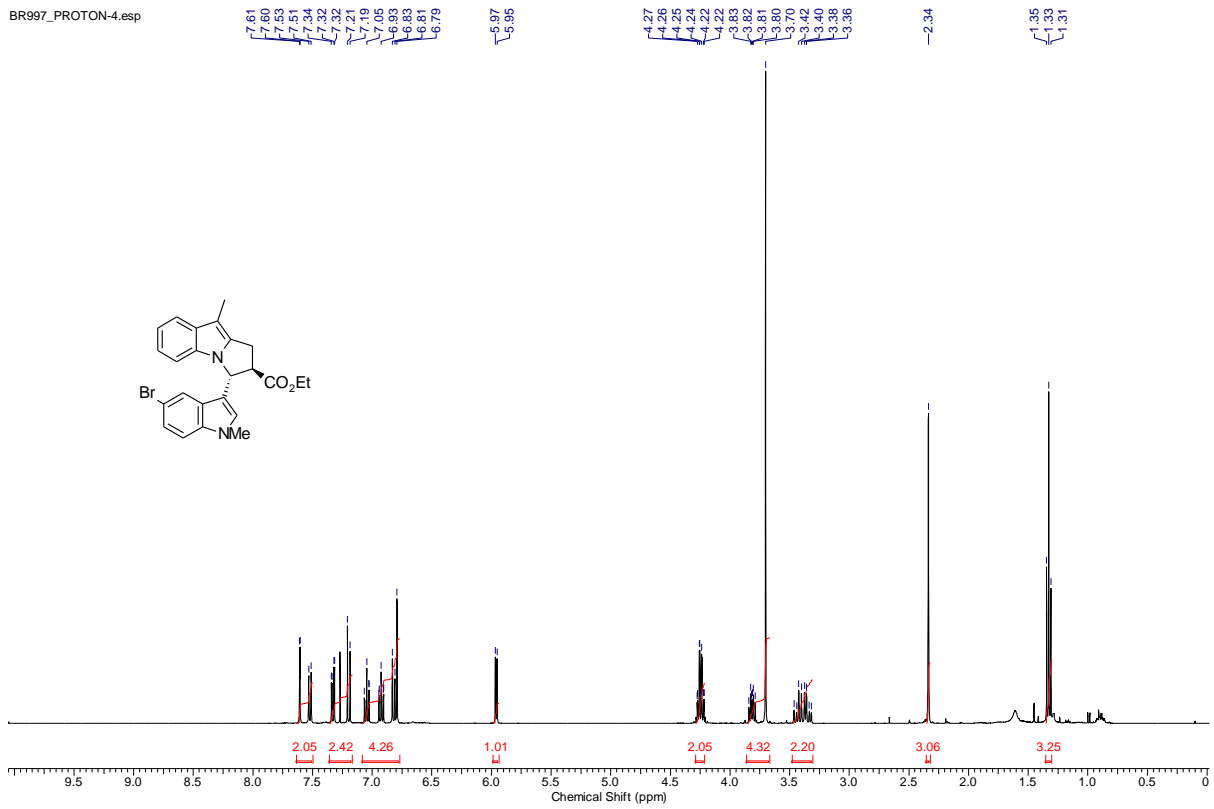

BR997\_13C-2.esp

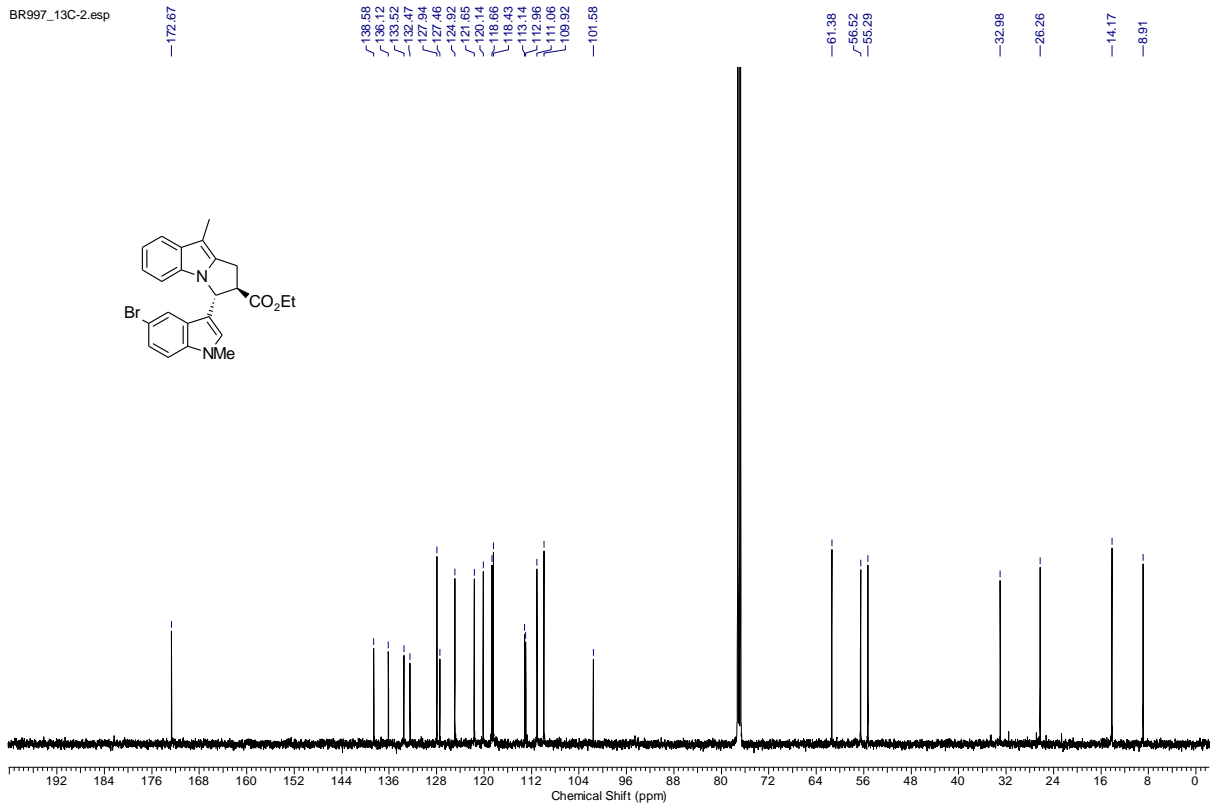

# <sup>1</sup>H and <sup>13</sup>C NMR of compound 16c

BR1026\_1H-5.esp

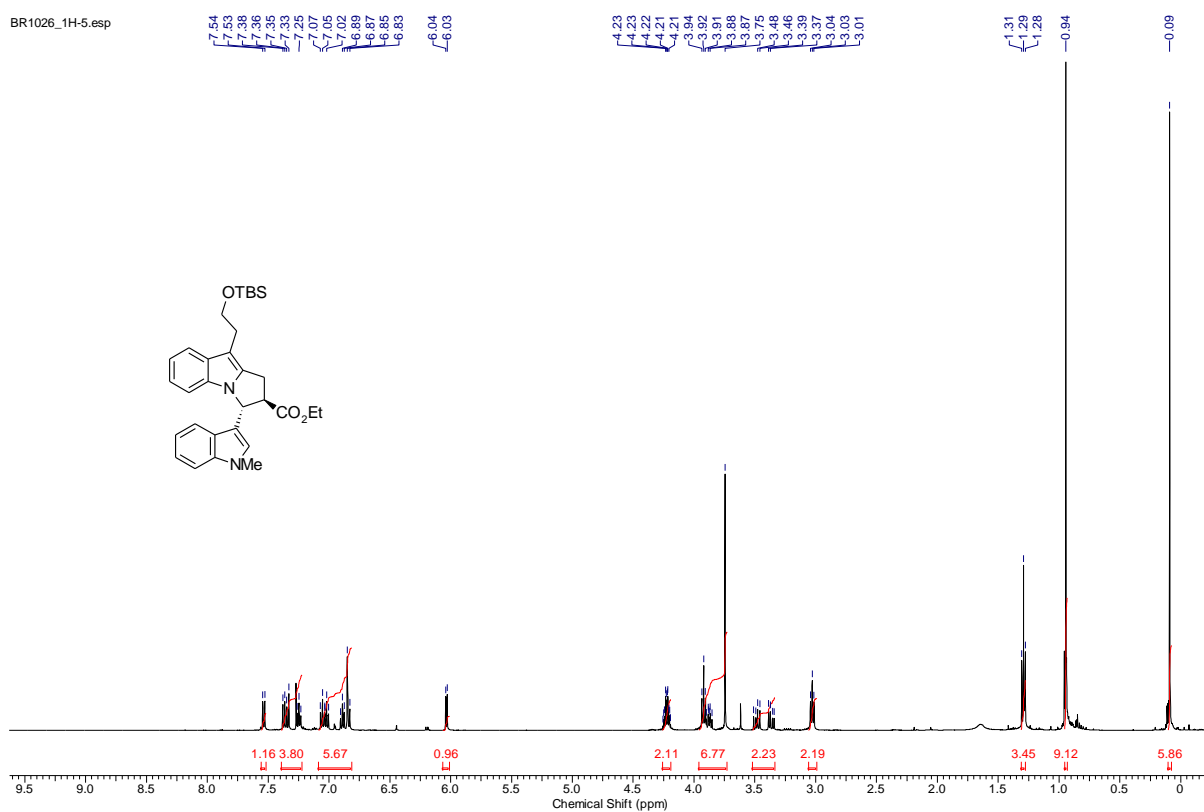

BR1026\_13C-2.esp

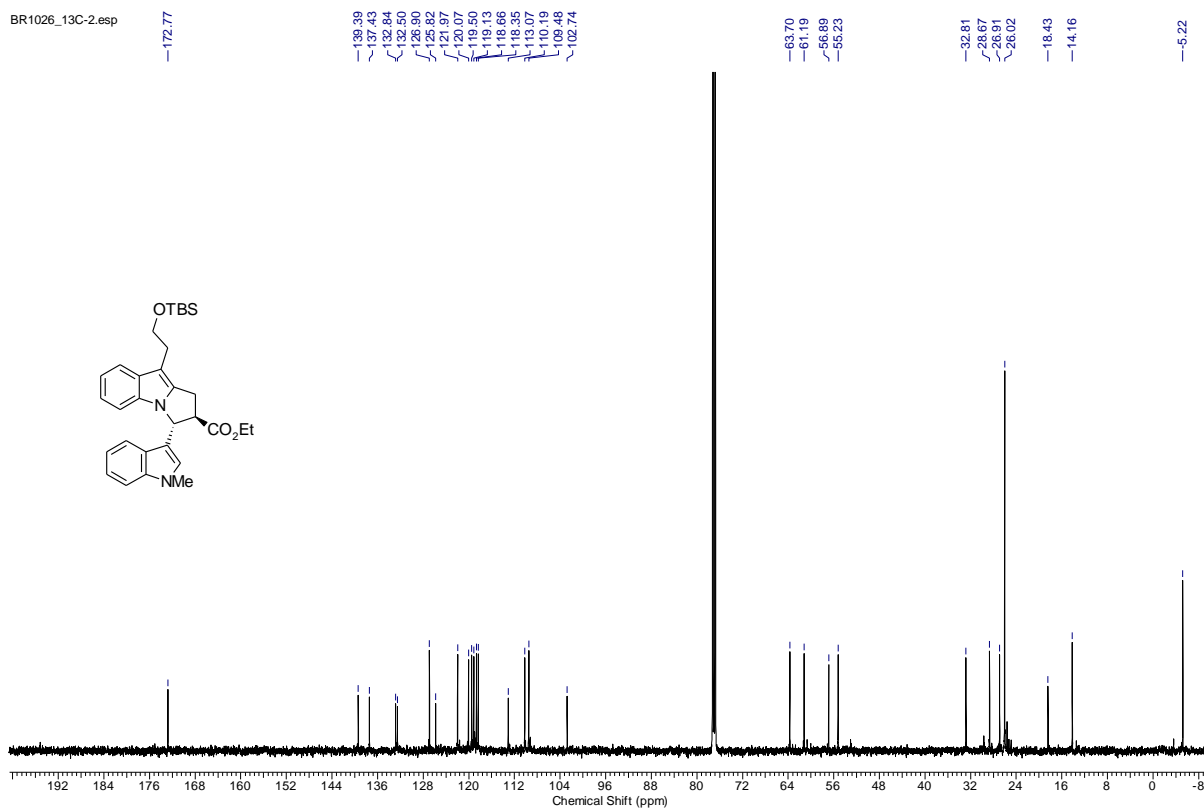

# <sup>1</sup>H and <sup>13</sup>C NMR of compound 16d

BR1027\_1H-4.esp

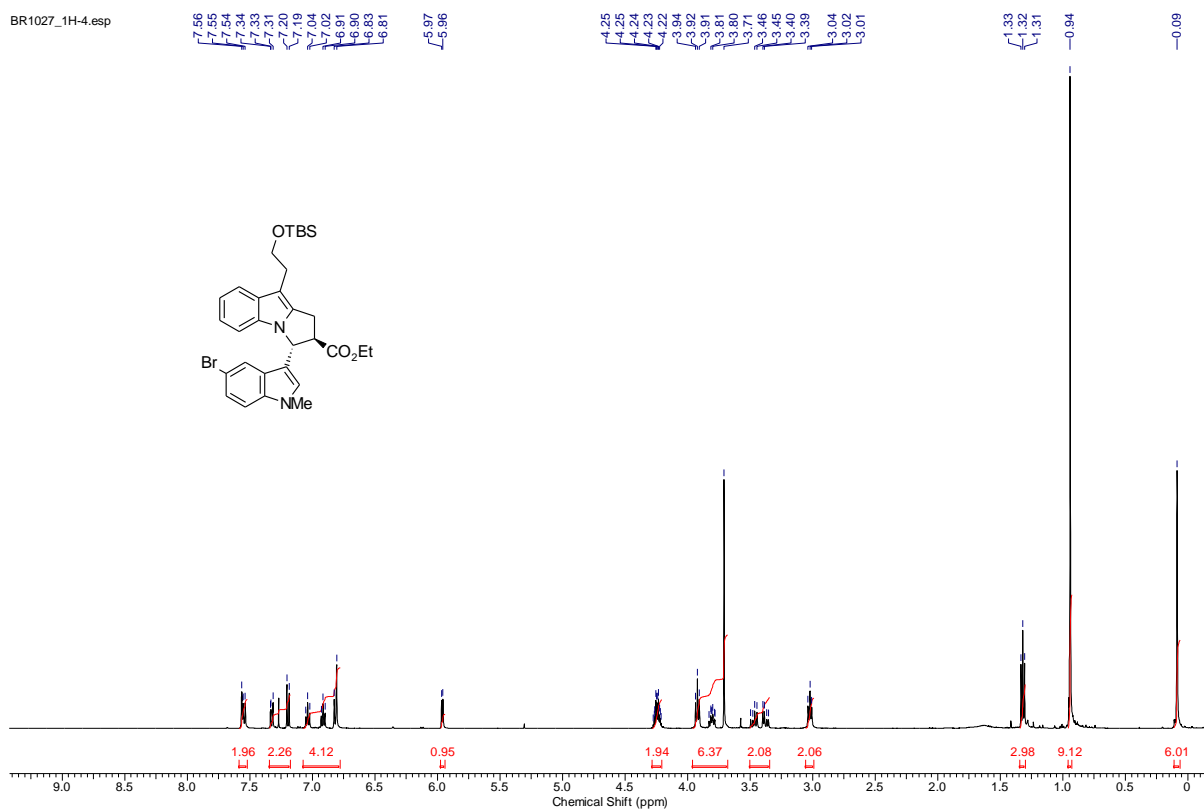

BR1027\_13C-2.esp

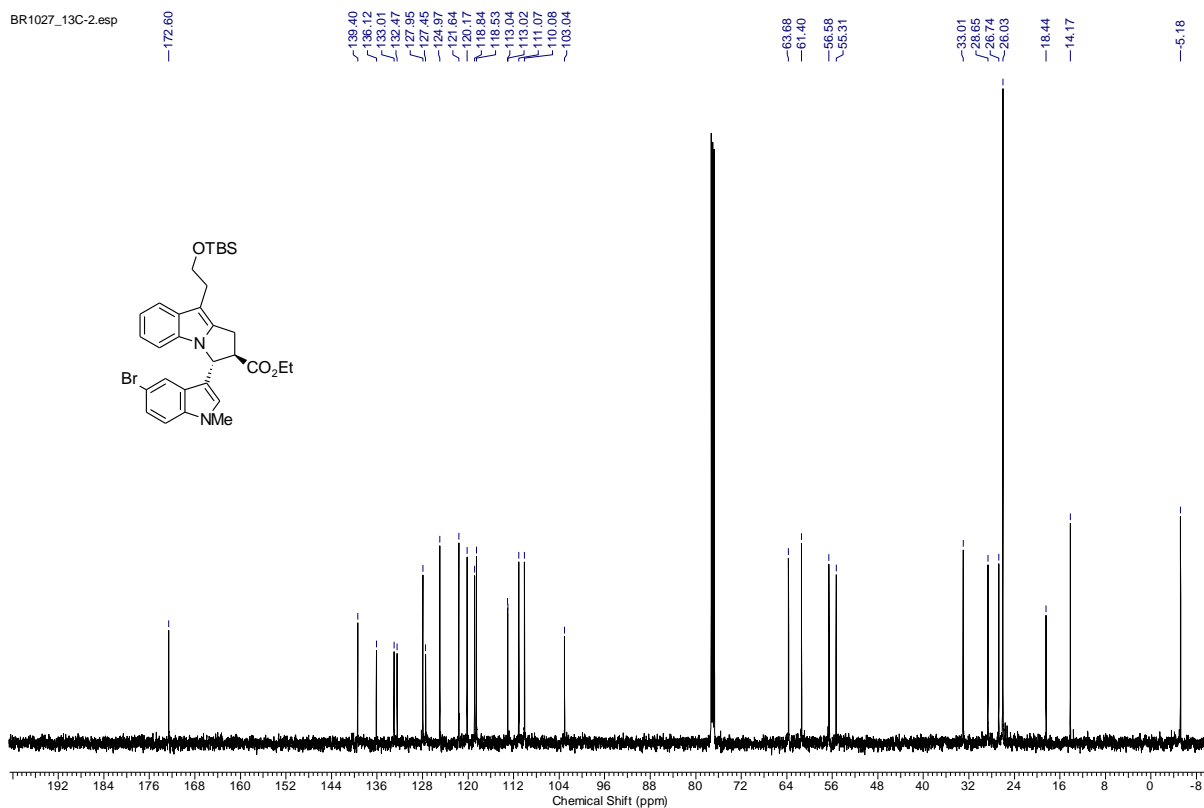

# <sup>1</sup>H and <sup>13</sup>C NMR of compound 16e

BR987\_1H-4.esp

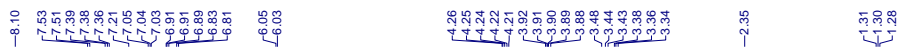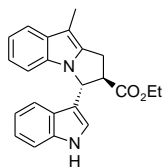

7:1 mixture

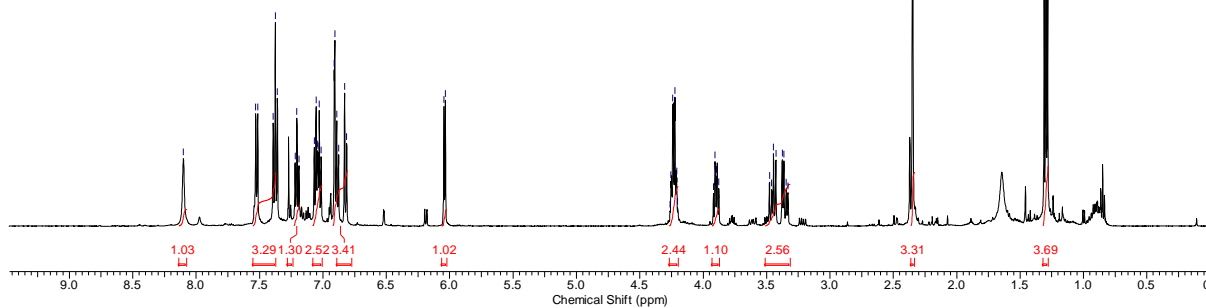

BR987\_13C-2.esp

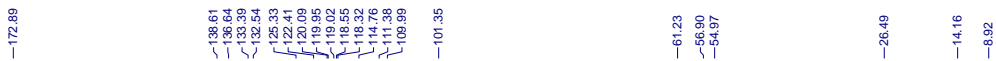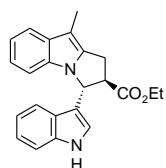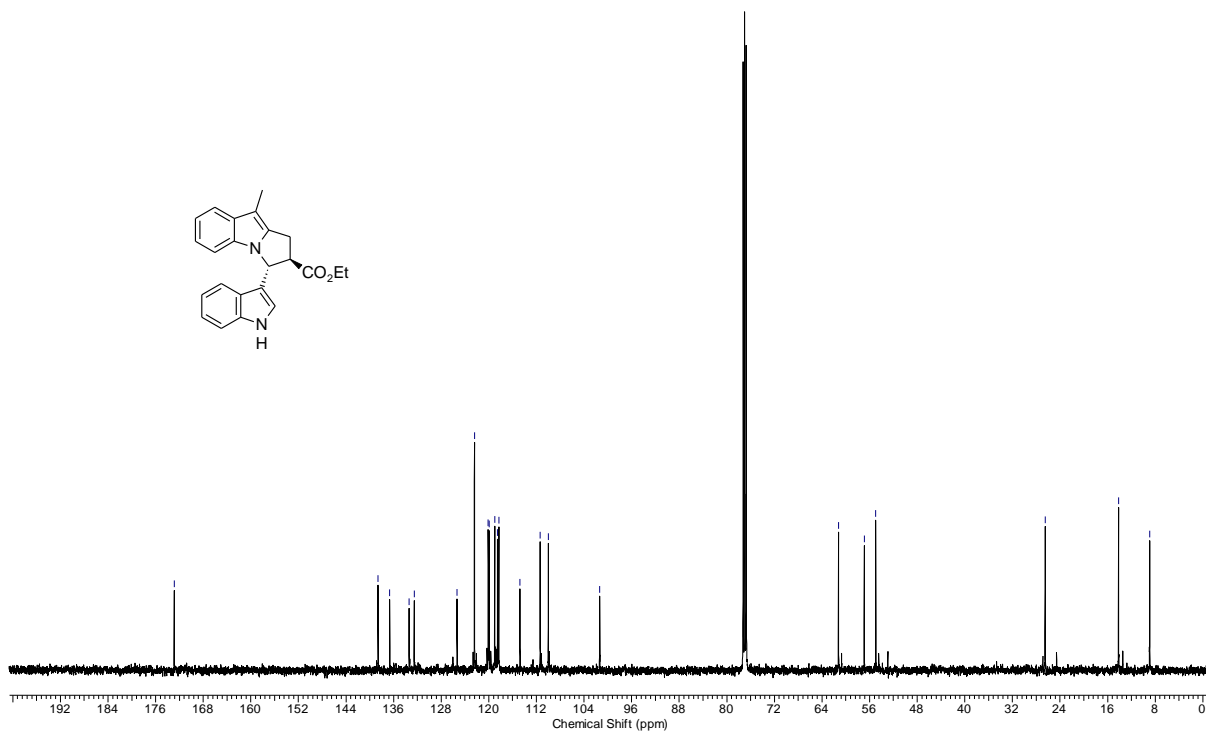

# <sup>1</sup>H and <sup>13</sup>C NMR of compound 16f

BR995\_1H-4.esp

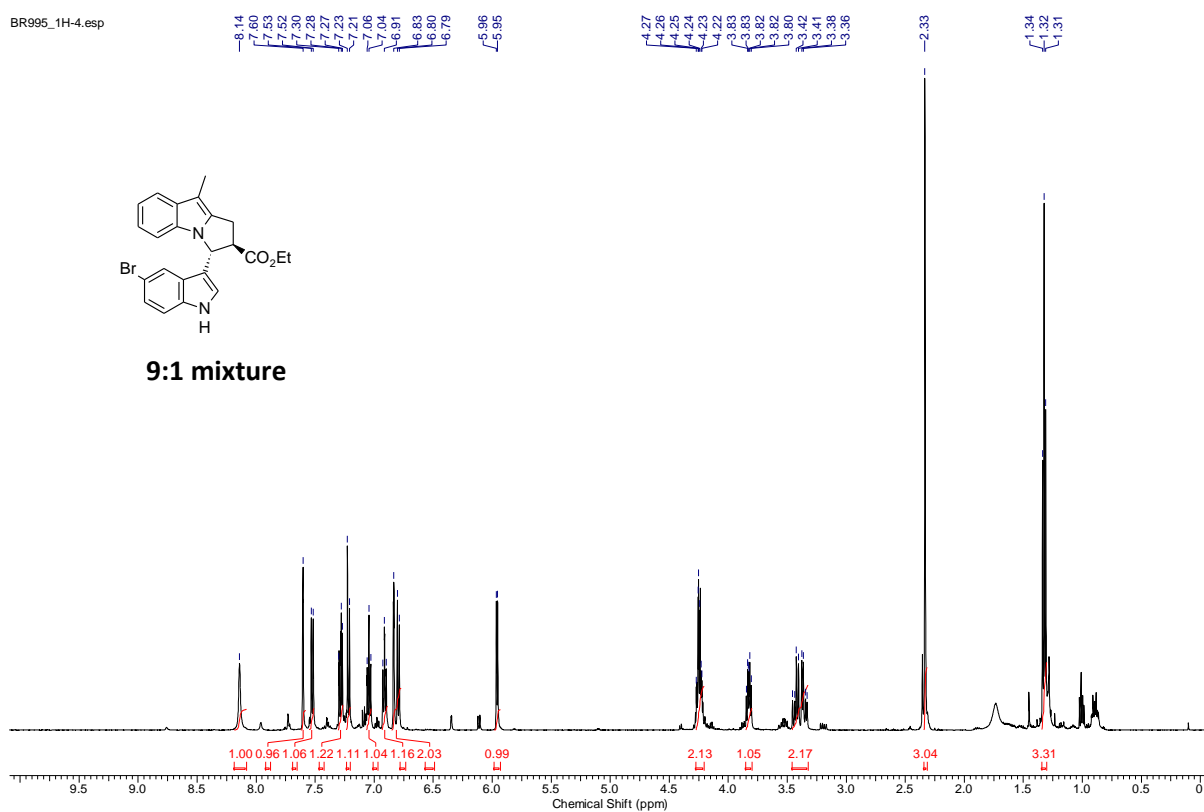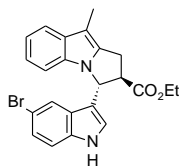

9:1 mixture

BR995\_13C-2.esp

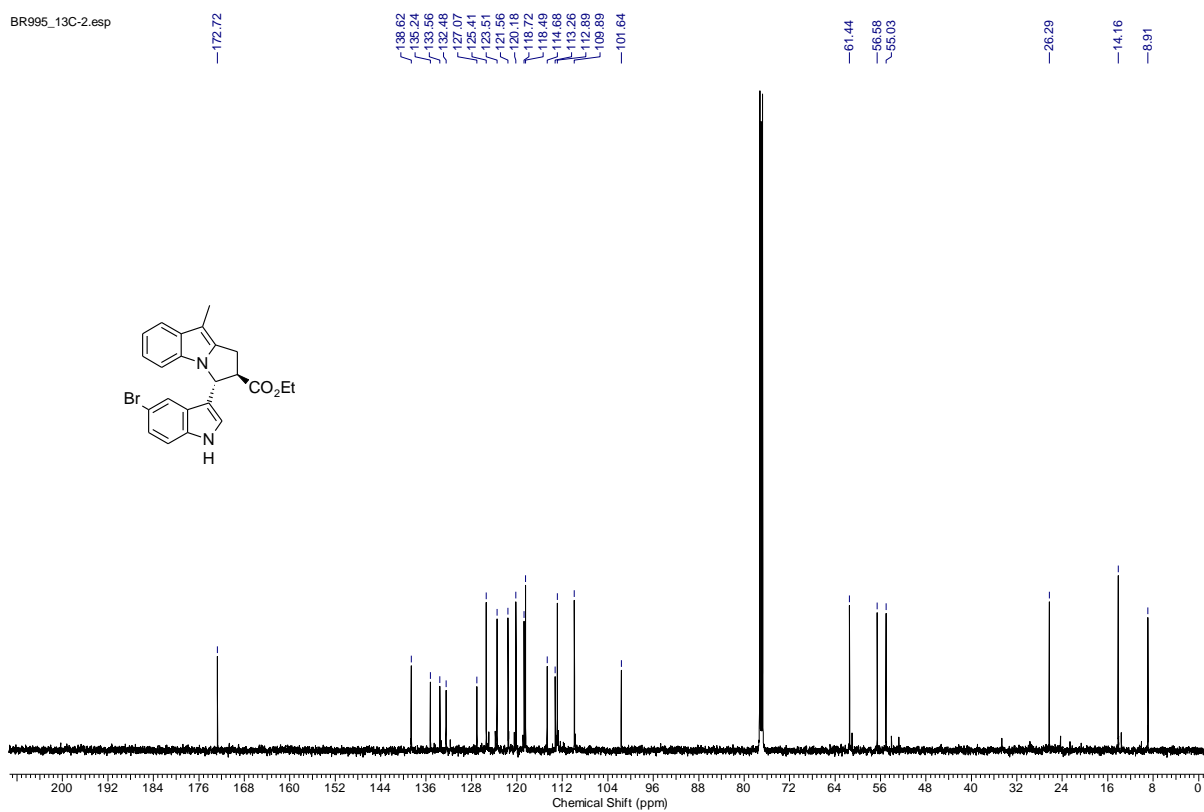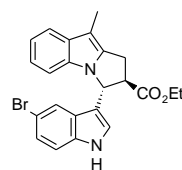

# <sup>1</sup>H and <sup>13</sup>C NMR of compound 16g

BR1024\_1H-5.esp

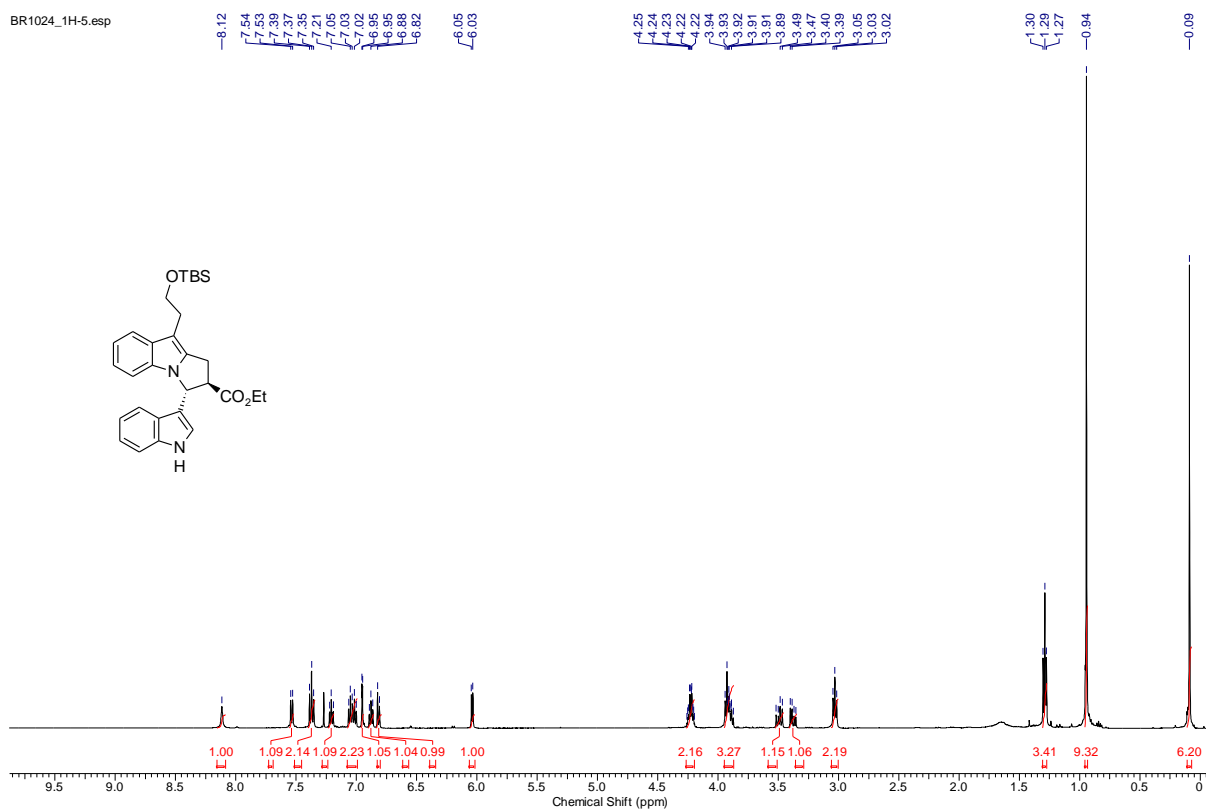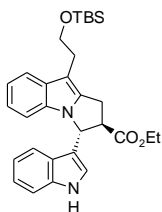

BR1024\_13C-2.esp

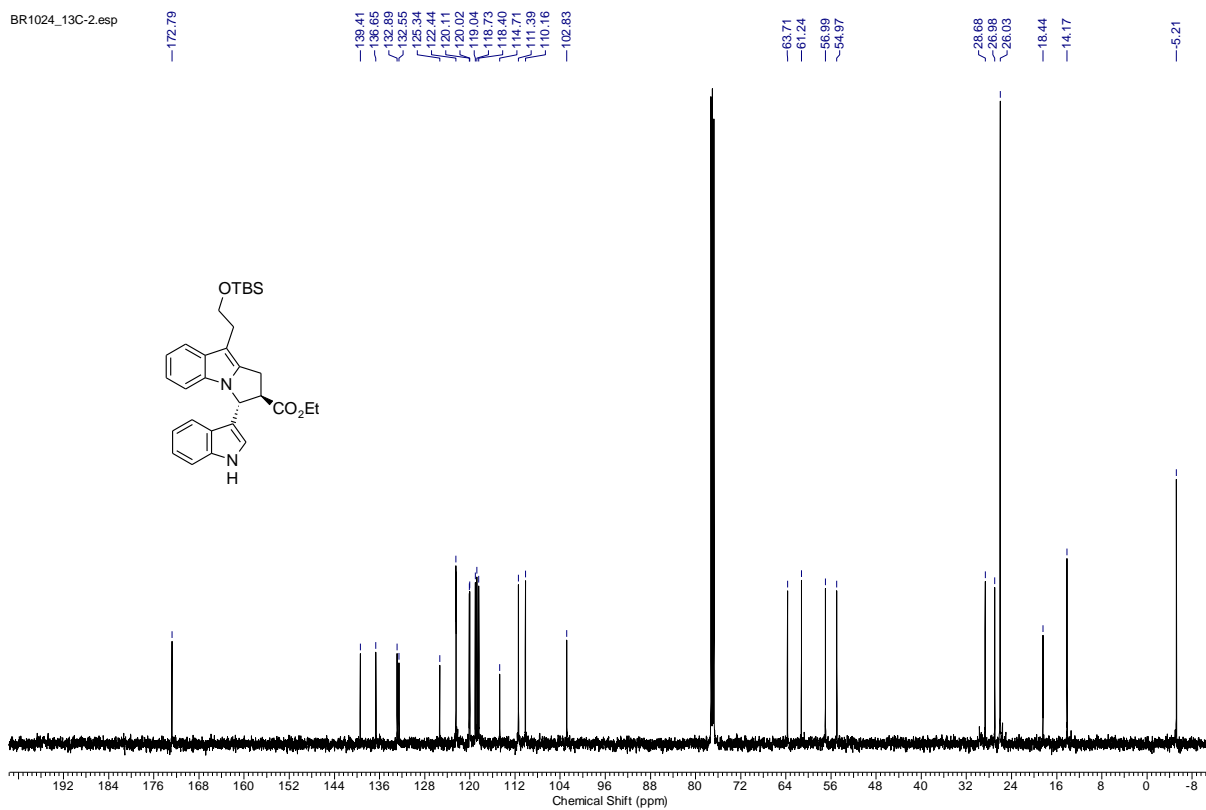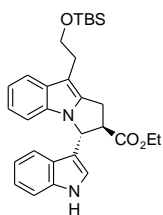

# <sup>1</sup>H and <sup>13</sup>C NMR of compound 16h

BR1042BELOW\_1H-5.esp

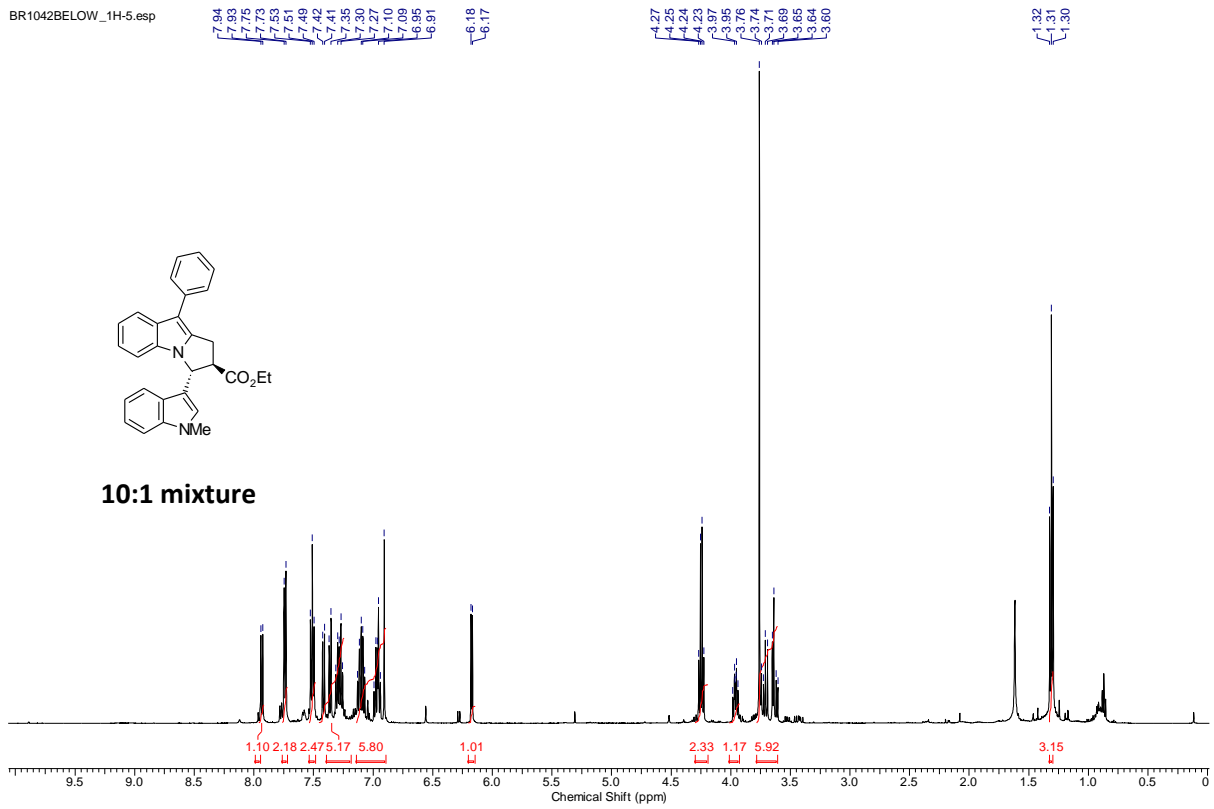

BR1042BELOW\_13C-2.esp

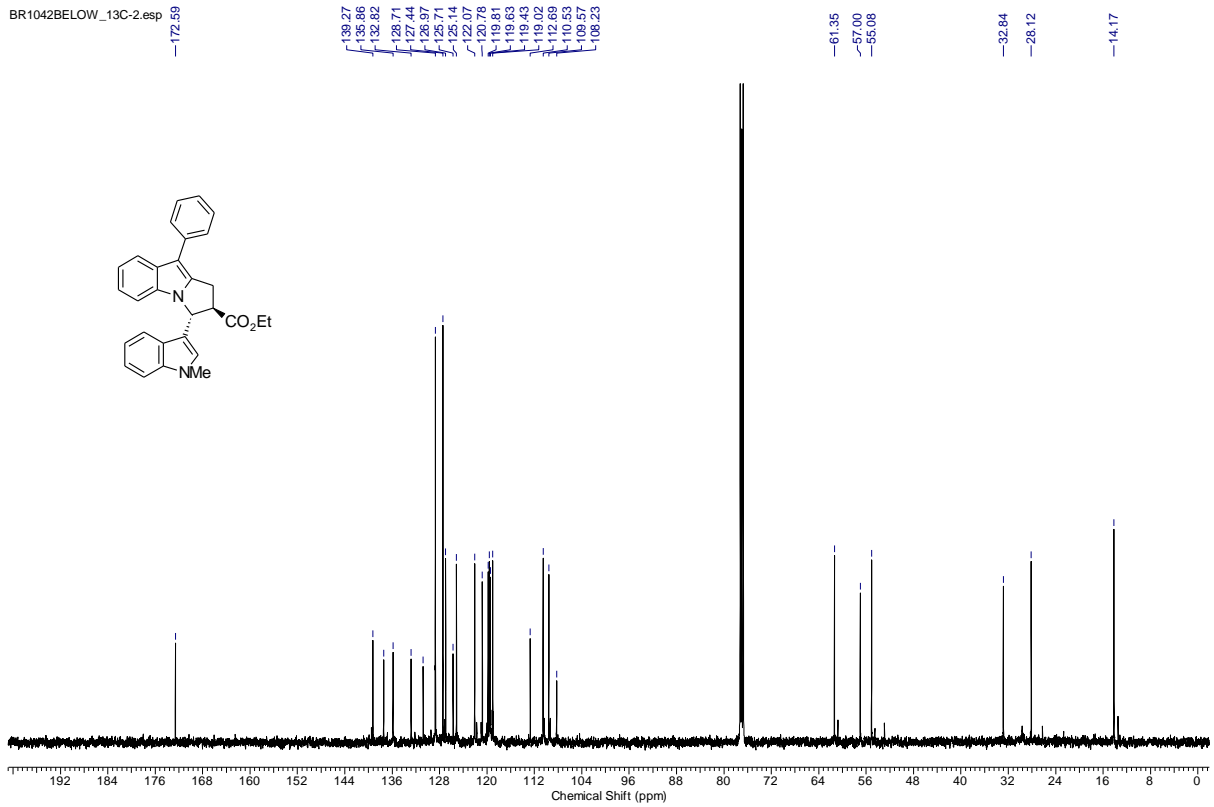



# <sup>1</sup>H and <sup>13</sup>C NMR of compound 16i

BR1043\_1H-4.esp

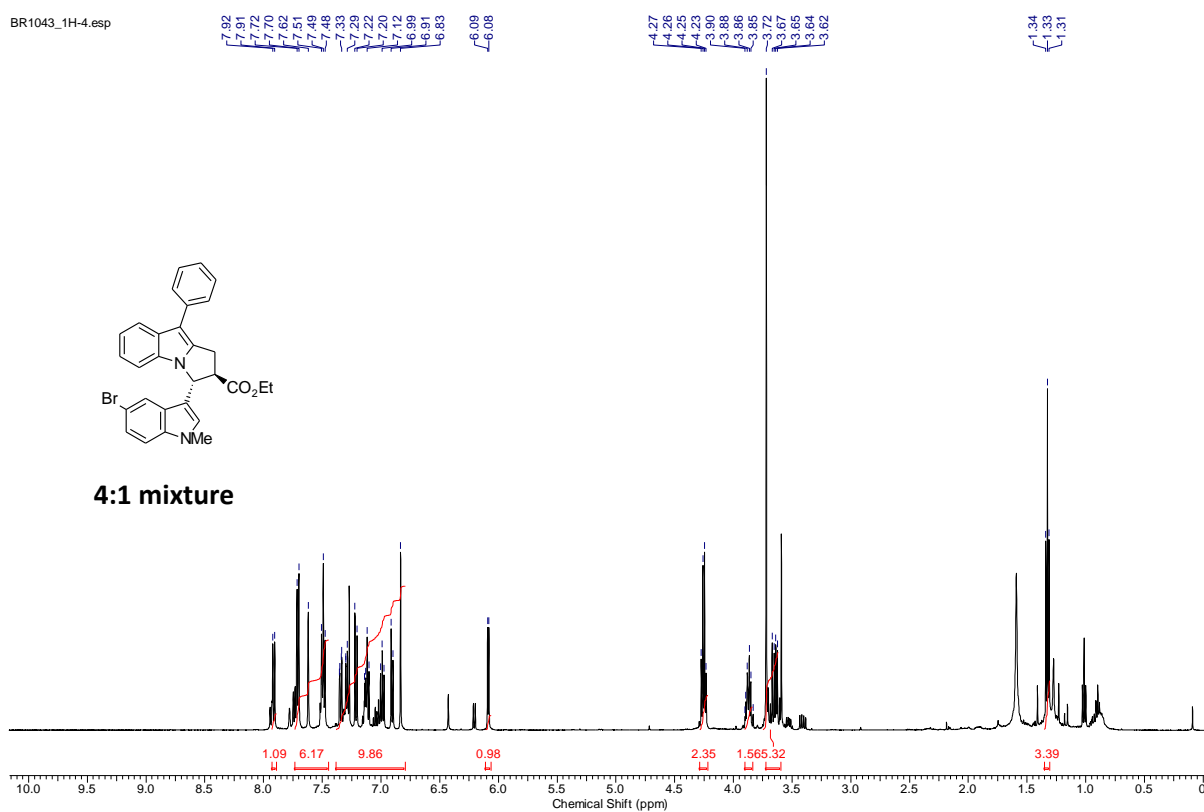

BR1043\_13C-4.esp

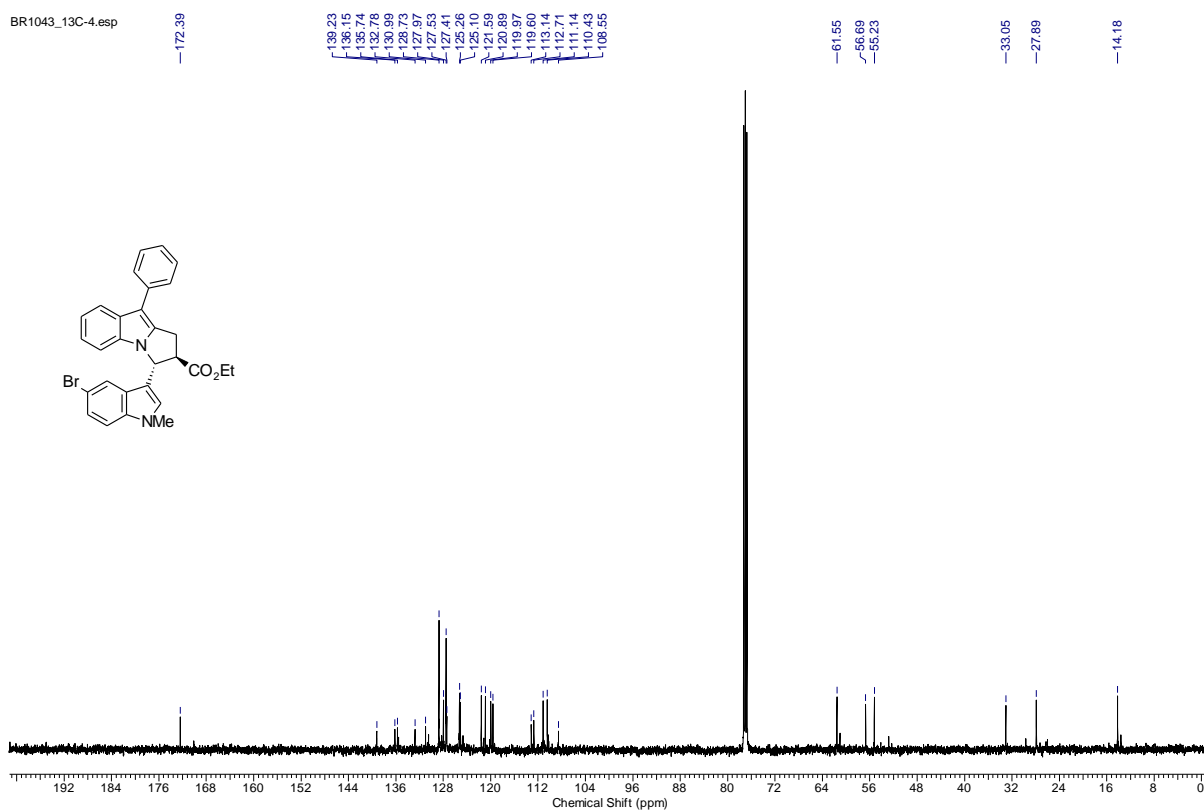

# <sup>1</sup>H and <sup>13</sup>C NMR of compound 16j

BR1051\_PROTON-4.esp

8.10, 7.54, 7.52, 7.39, 7.36, 7.21, 7.05, 7.03, 7.01, 6.86, 6.85, 6.88, 6.83, 6.71, 6.12, 6.10, 6.09, 6.07, 6.05, 6.04, 5.21, 5.21, 5.17, 5.16, 5.11, 5.08, 5.08, 4.25, 4.23, 4.19, 4.19, 3.90, 3.89, 3.88, 3.88, 3.56, 3.55, 3.42, 3.37, 3.36, 1.30, 1.29, 1.27

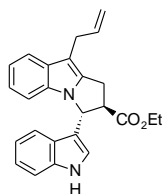

20:1 mixture

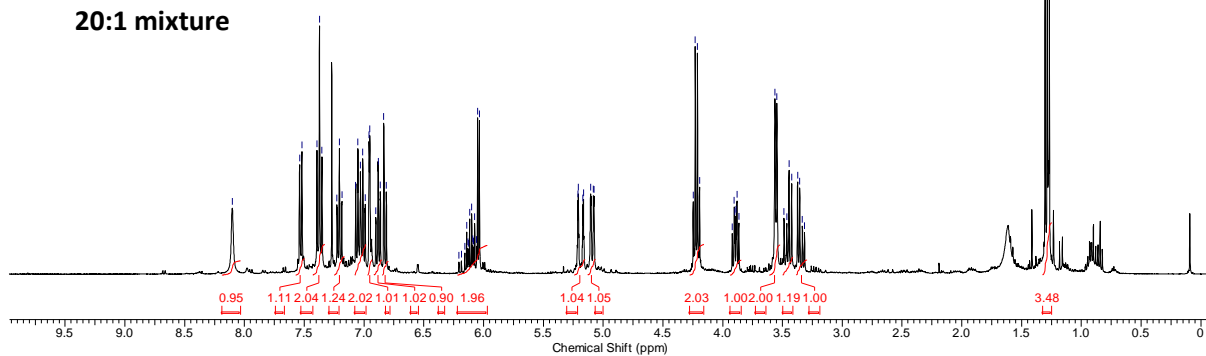

BR1051\_13C-3.esp

172.83, 139.01, 137.21, 136.68, 132.65, 132.56, 125.34, 122.45, 120.78, 120.01, 118.74, 118.56, 114.73, 111.40, 110.13, 103.75, 61.25, 56.90, 55.05, 28.20, 26.96, 14.17

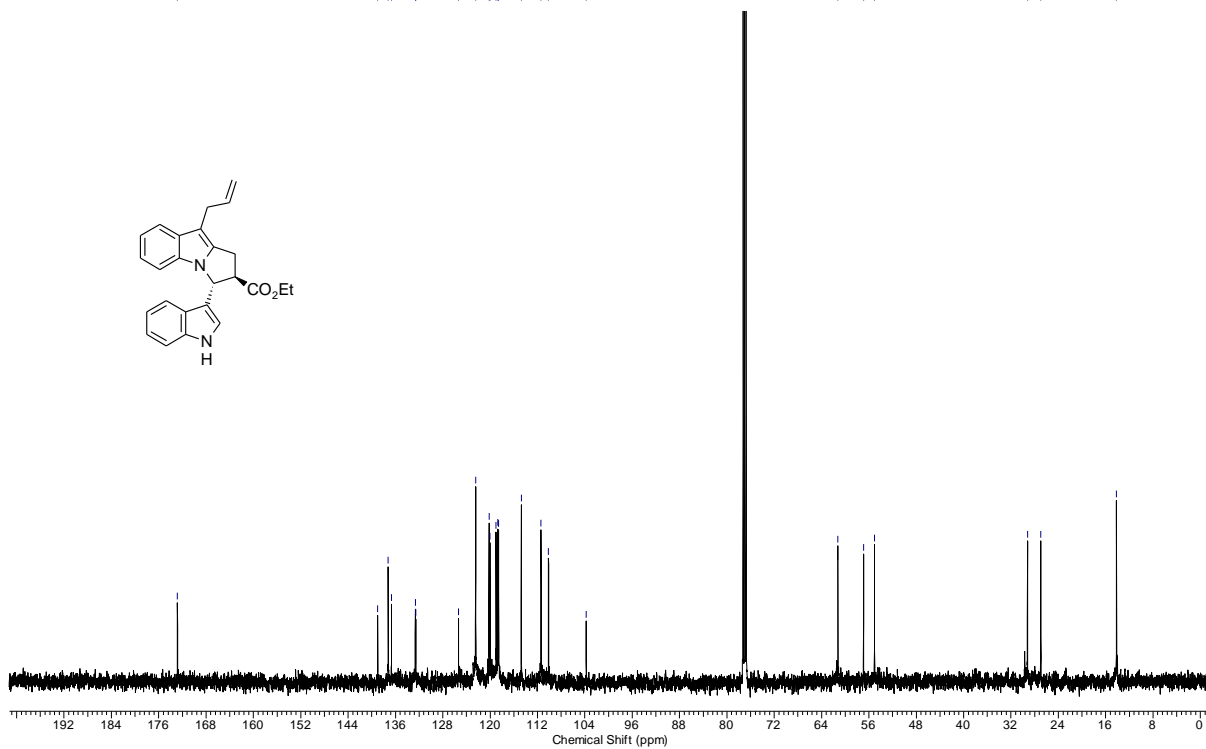

# <sup>1</sup>H and <sup>13</sup>C NMR of compound 16k

BR1052\_1H-4.esp

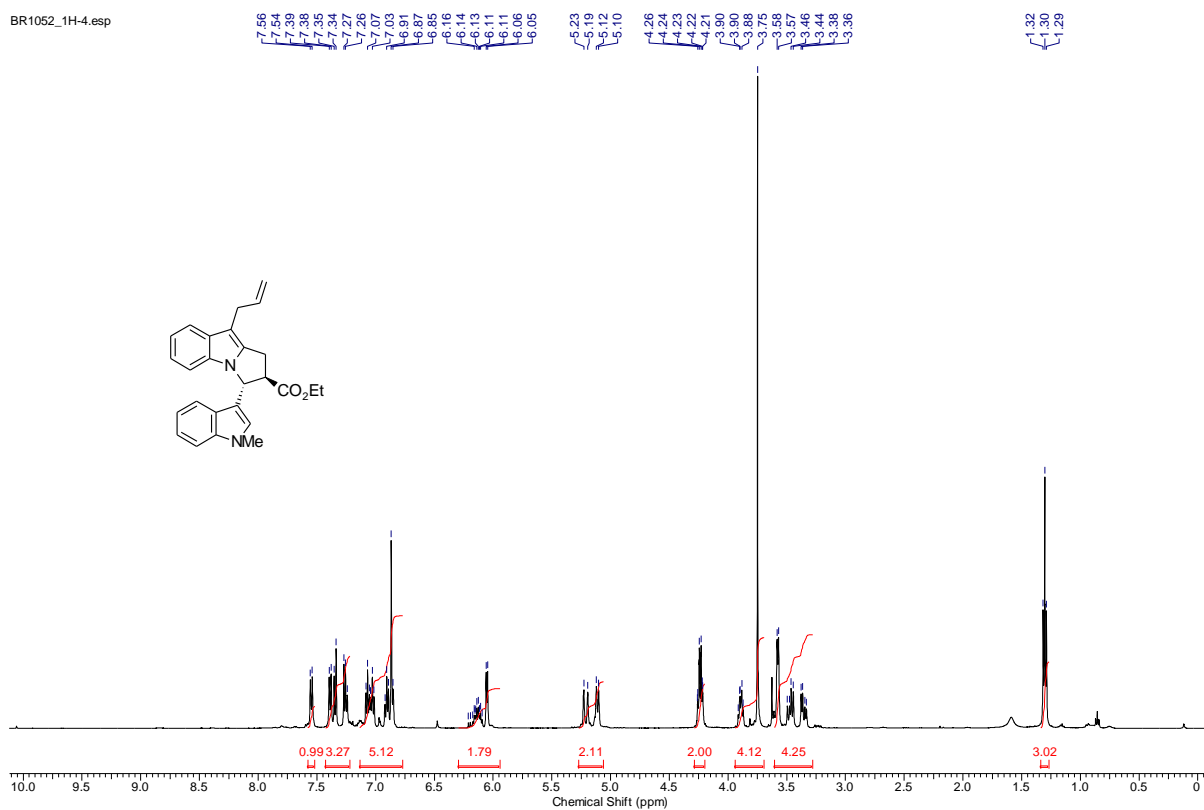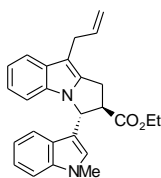

BR1052\_13C-2.esp

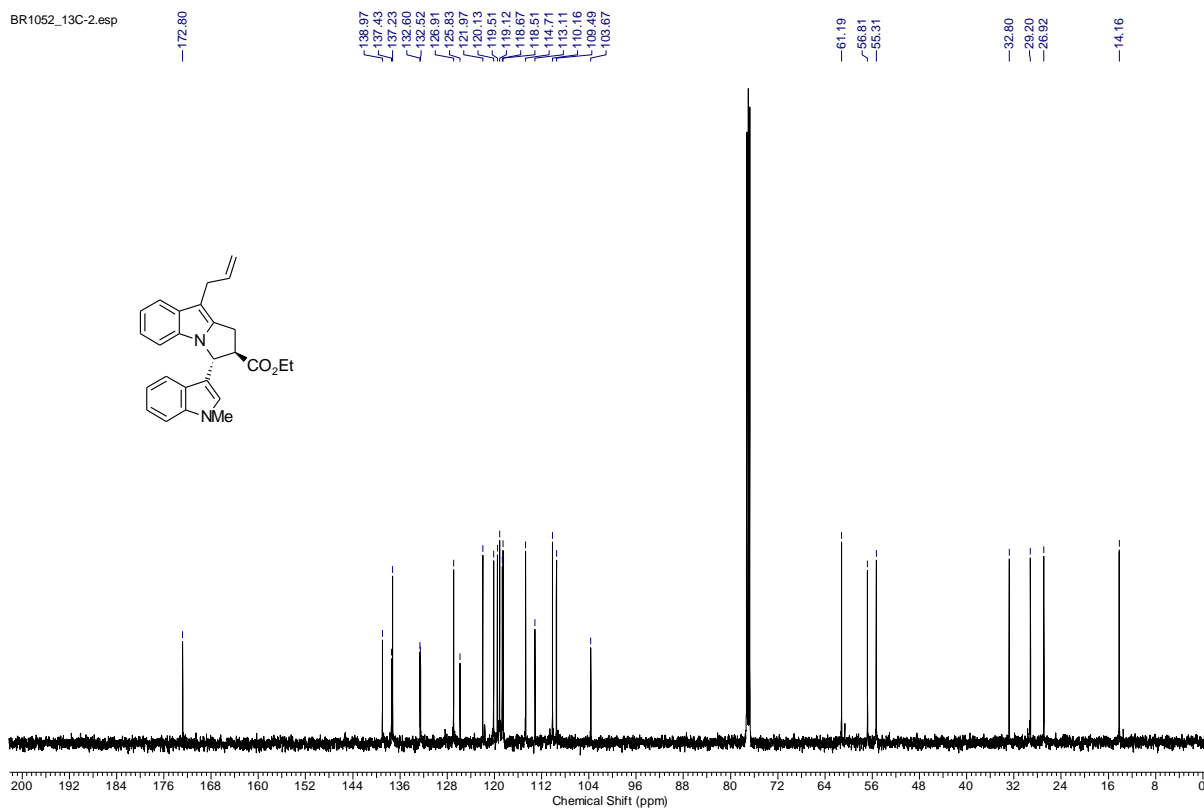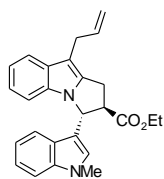

# <sup>1</sup>H and <sup>13</sup>C NMR of compound 16l

BR1054PURE\_1H-4.esp

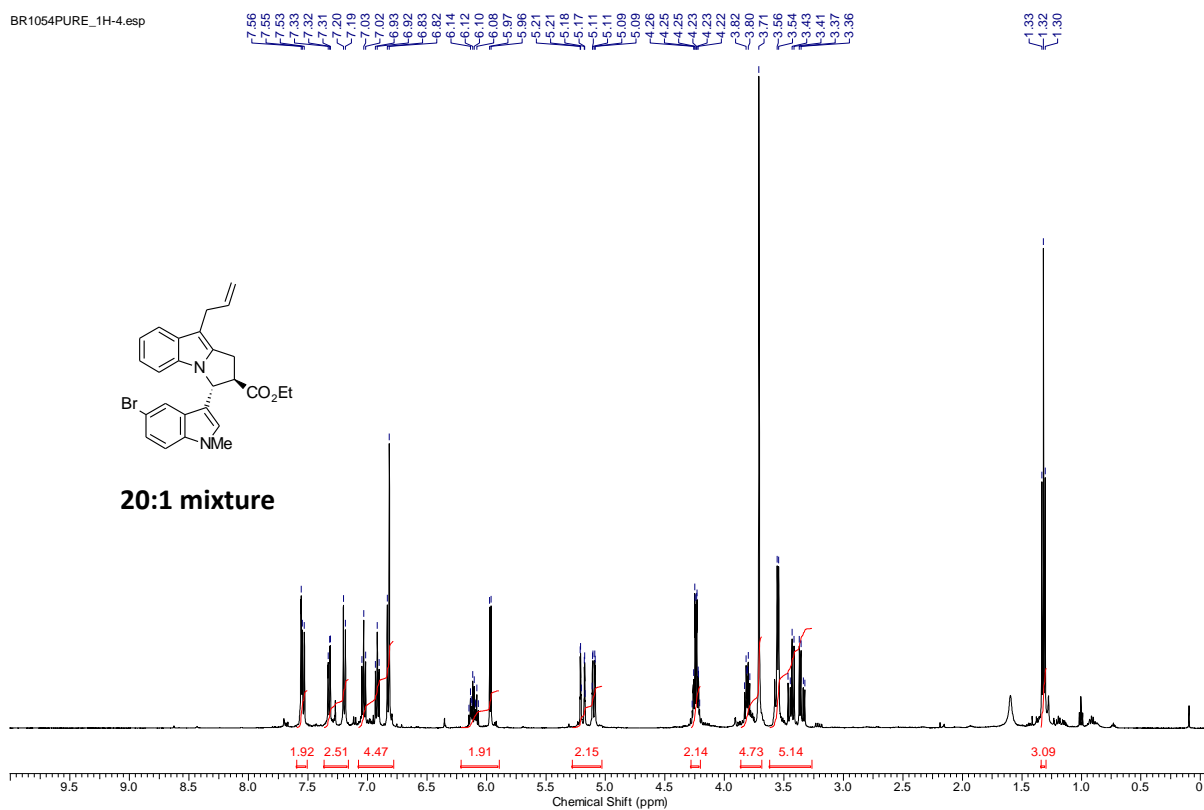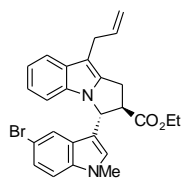

20:1 mixture

BR1054\_13C-2.esp

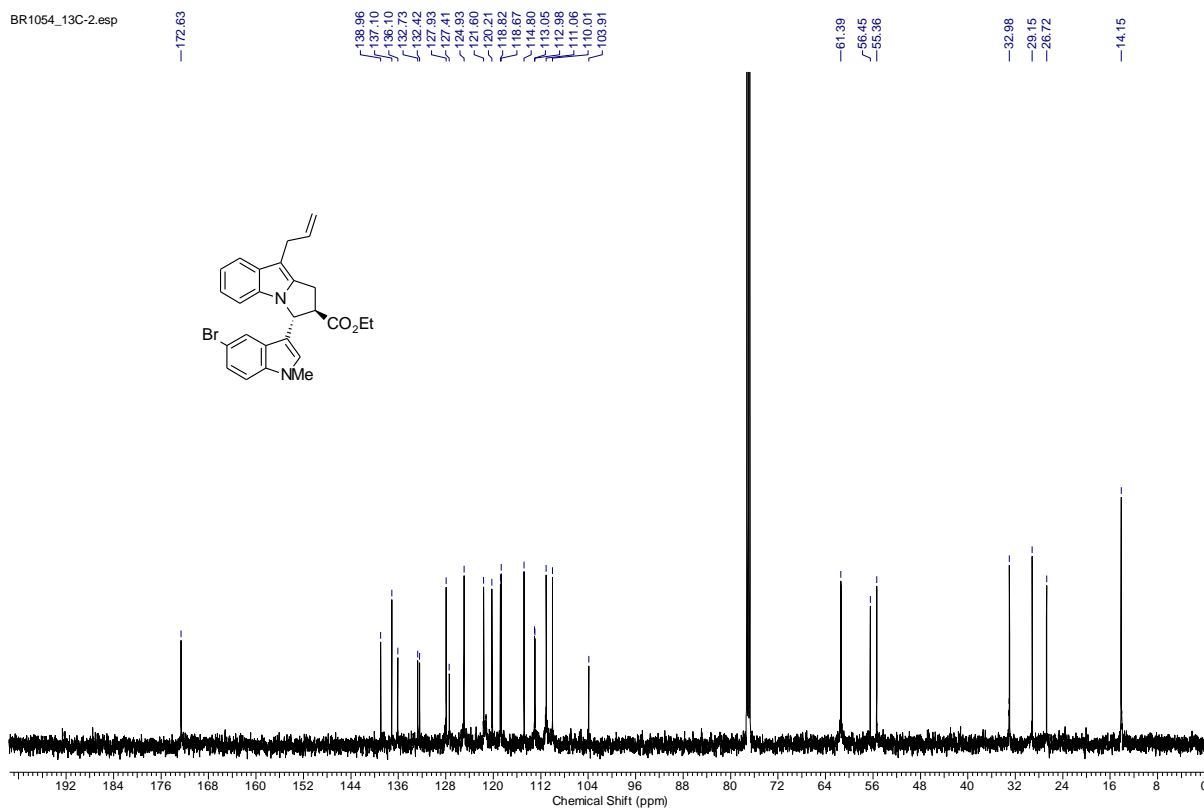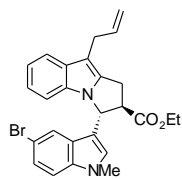

# <sup>1</sup>H and <sup>13</sup>C NMR of compound 16m

BR1074P3\_PROTON-7.esp

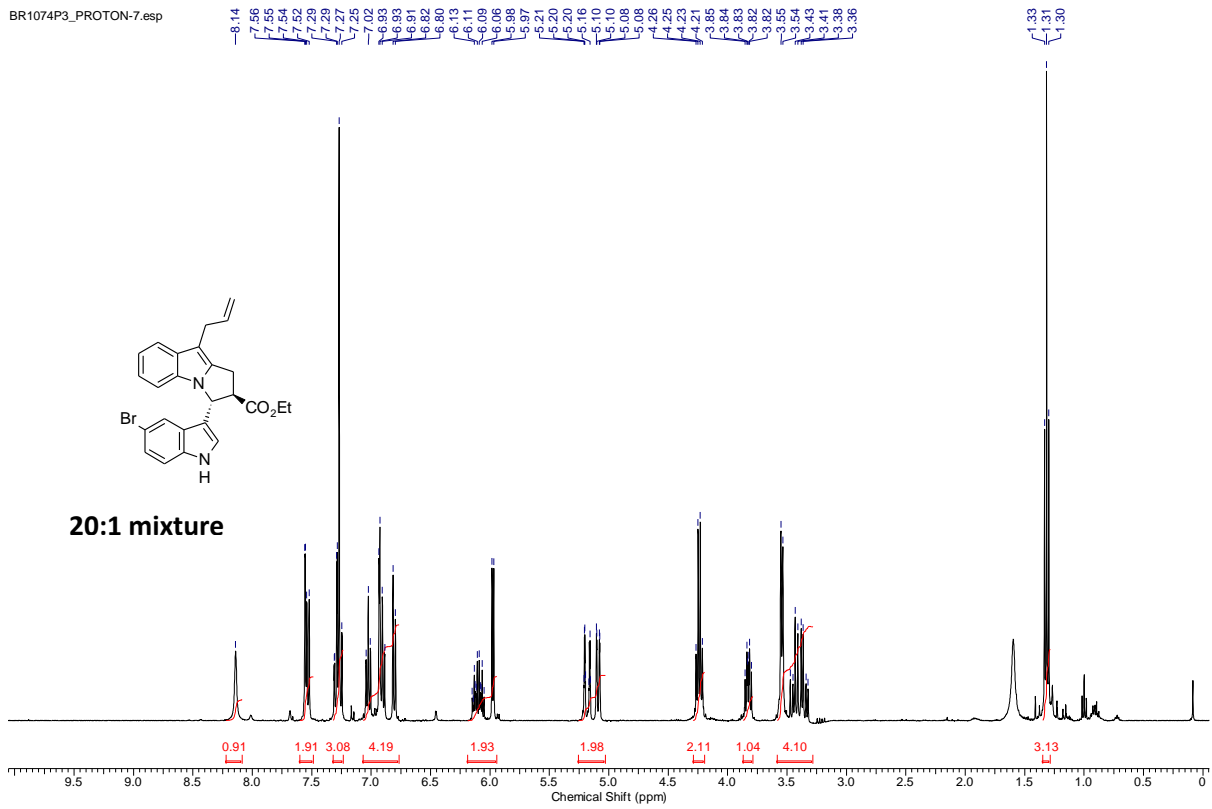

BR1074\_13C-2.esp

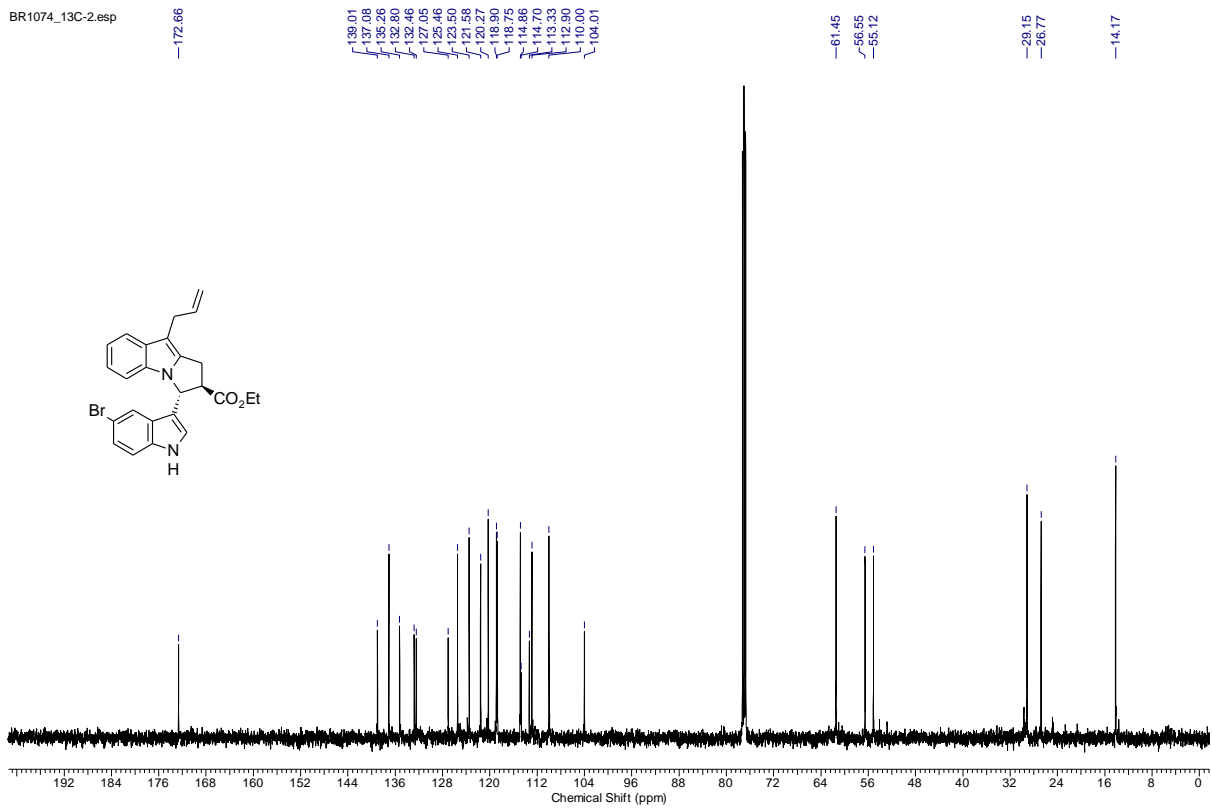

# <sup>1</sup>H and <sup>13</sup>C NMR of compound 17a

BRINDBORN\_1H-4.esp

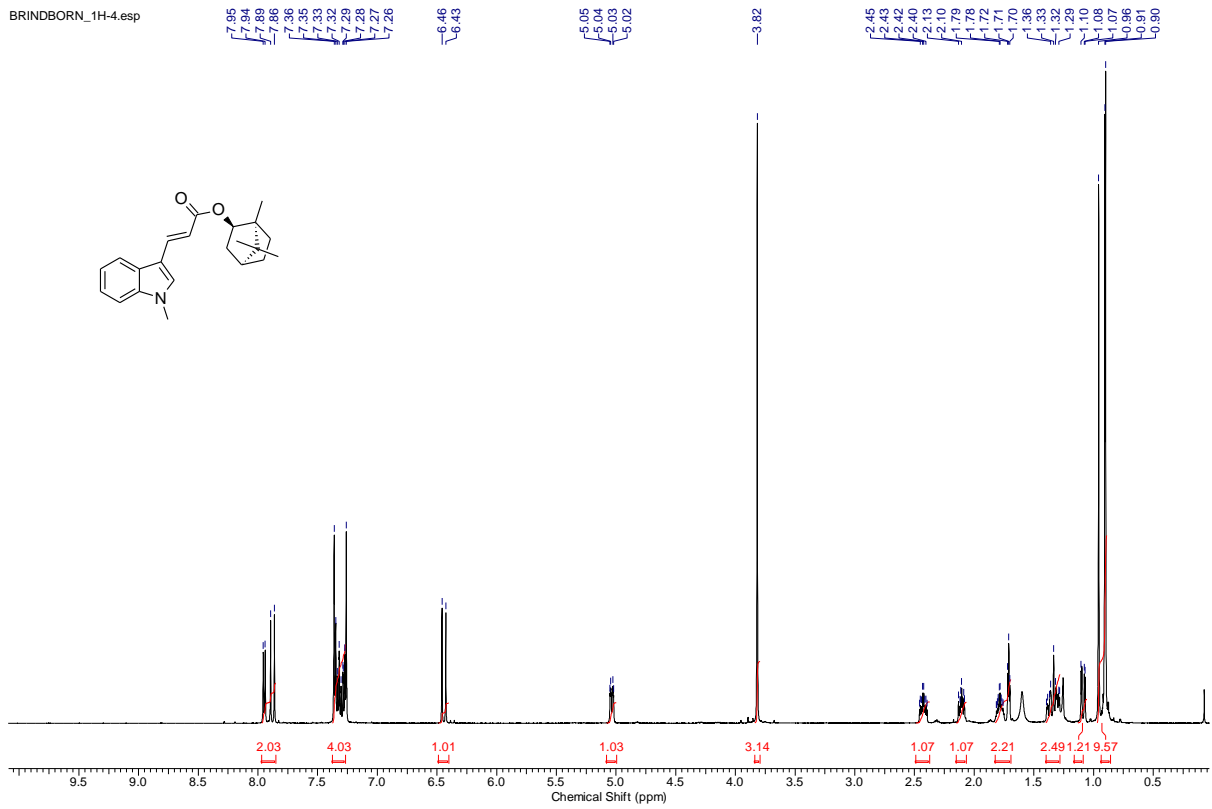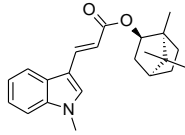

BRINDBORN\_13C-2.esp

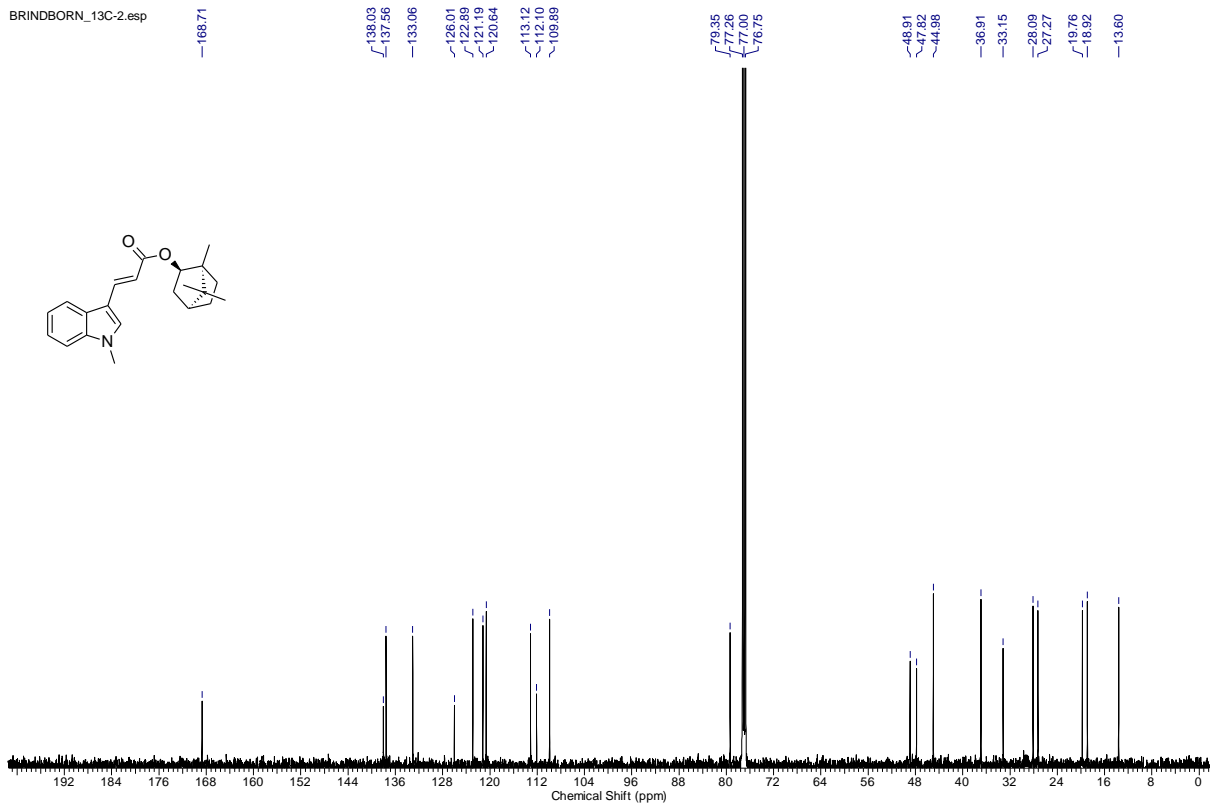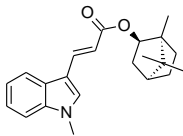

# <sup>1</sup>H and <sup>13</sup>C NMR of compound 17b

BRINDPL\_1H-5.esp

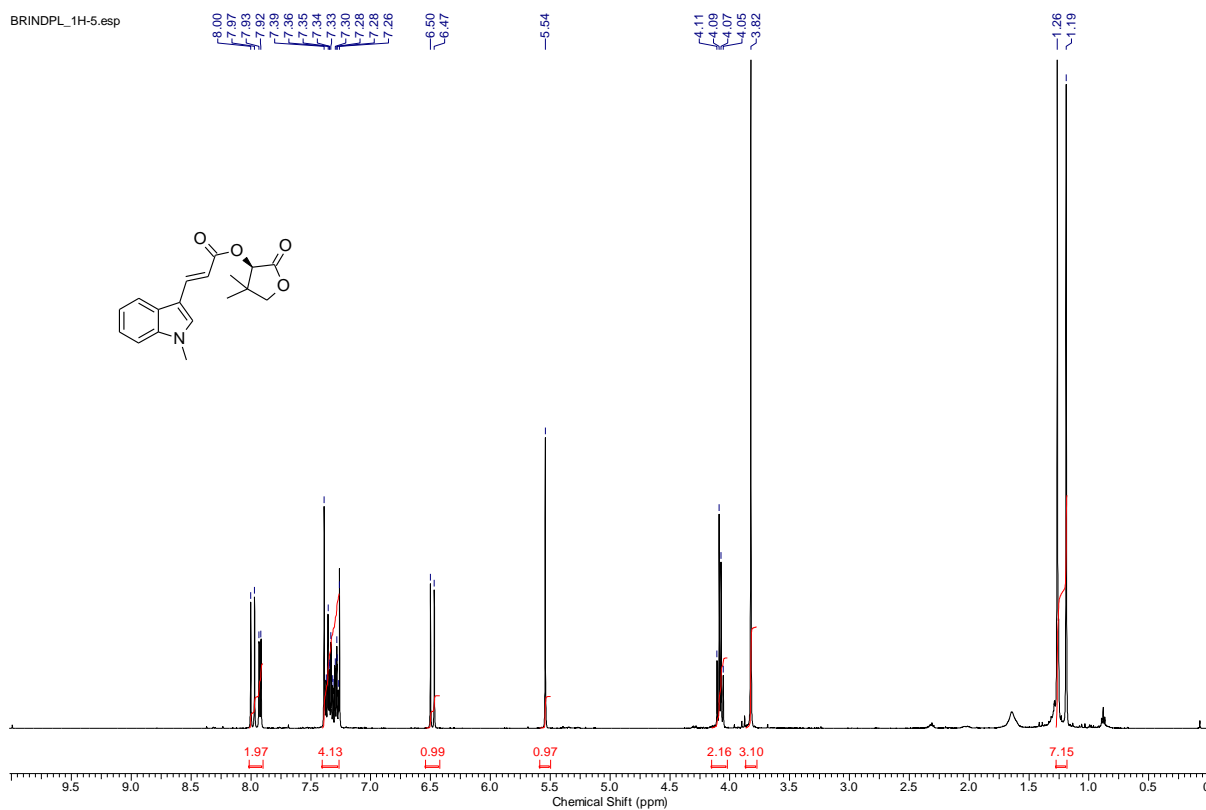

BRINDPL\_13C-2.esp

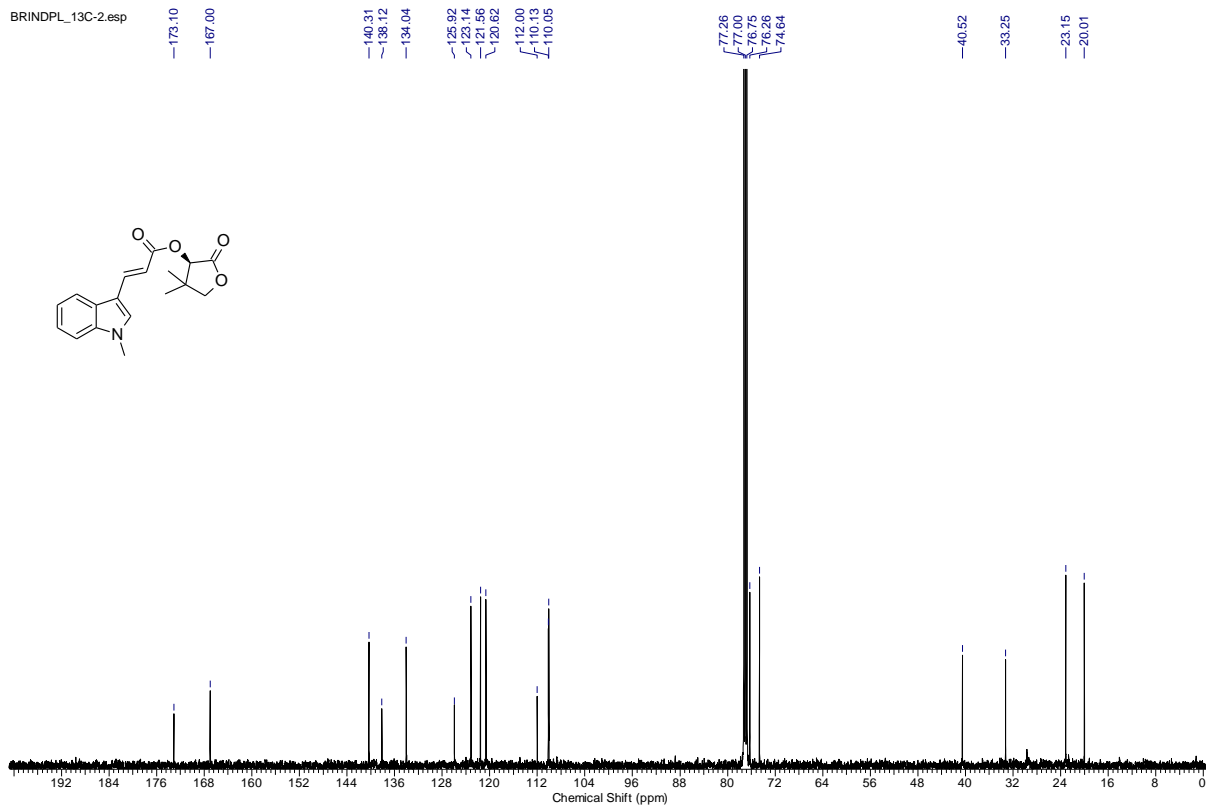

# <sup>1</sup>H and <sup>13</sup>C NMR of compound 17c

B.RAGHAVENDER\_1H1non\_E2.esp

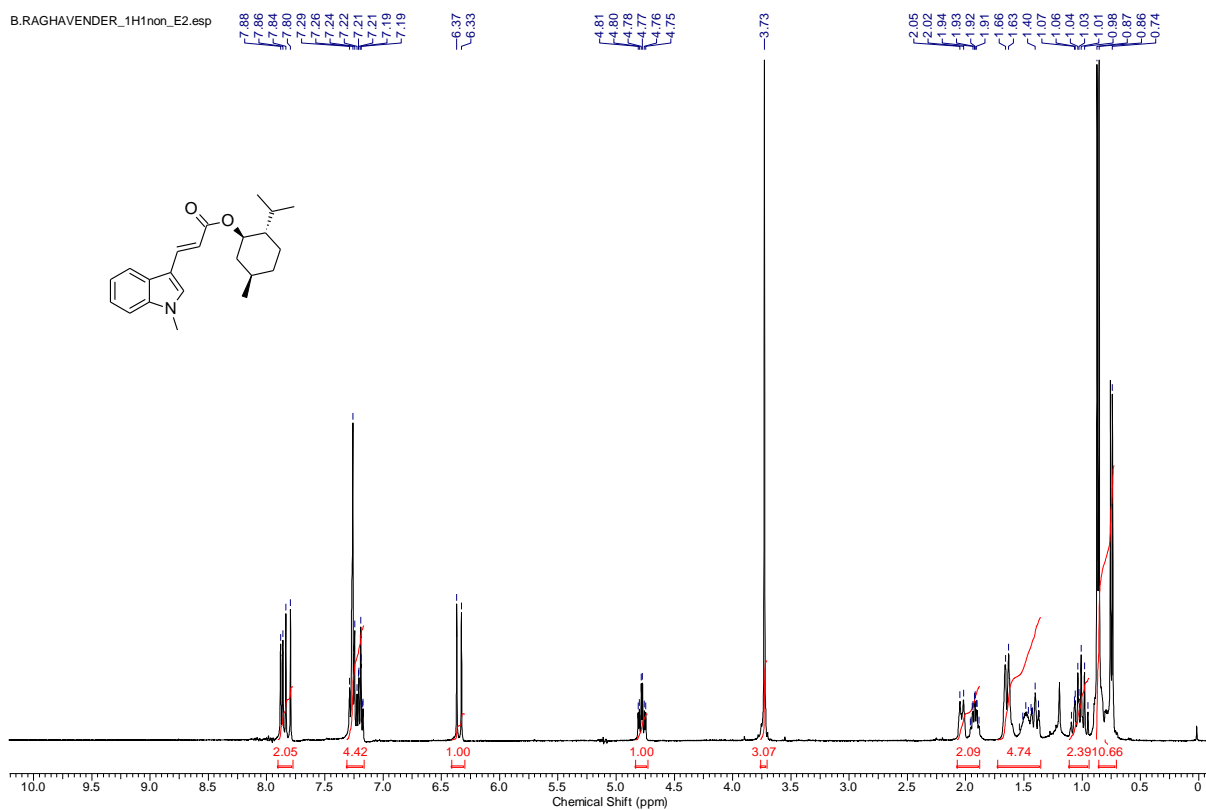

INDMEN\_13C-1.esp

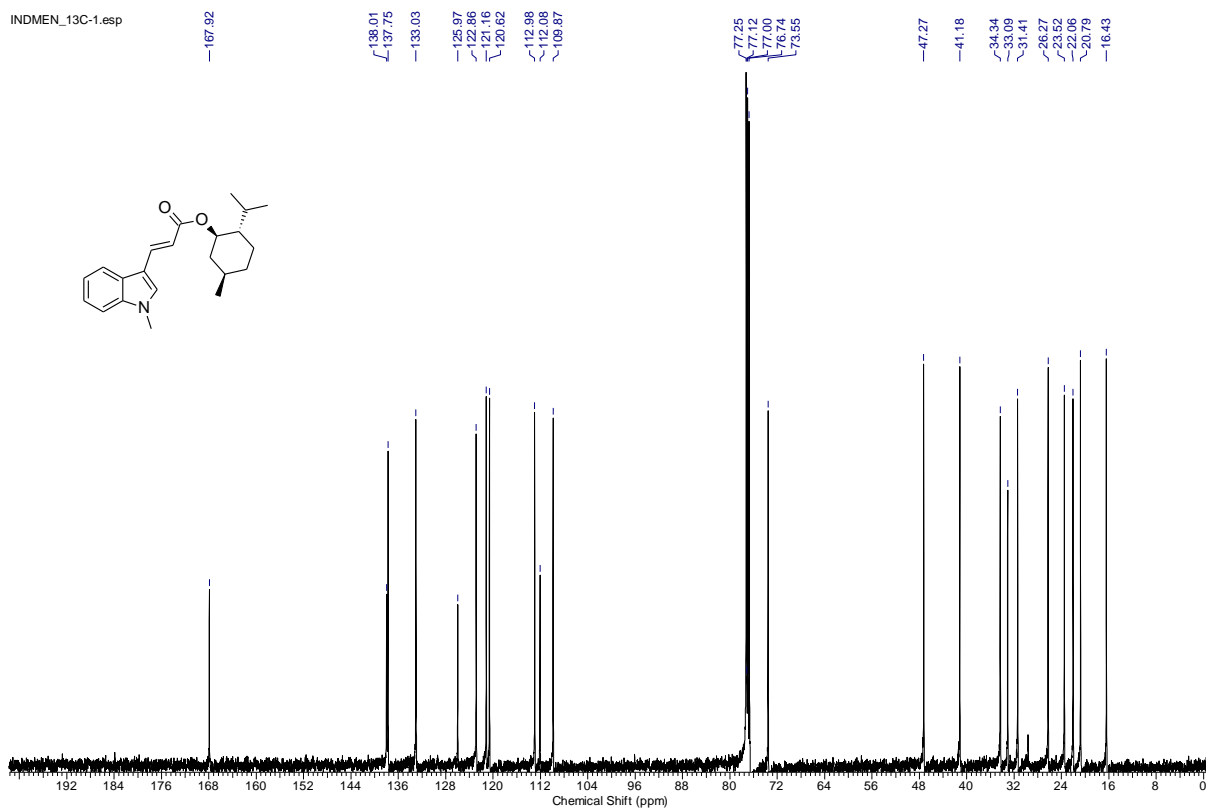



# <sup>1</sup>H and <sup>13</sup>C NMR of compound 17d

BR606IM\_1H-4.esp

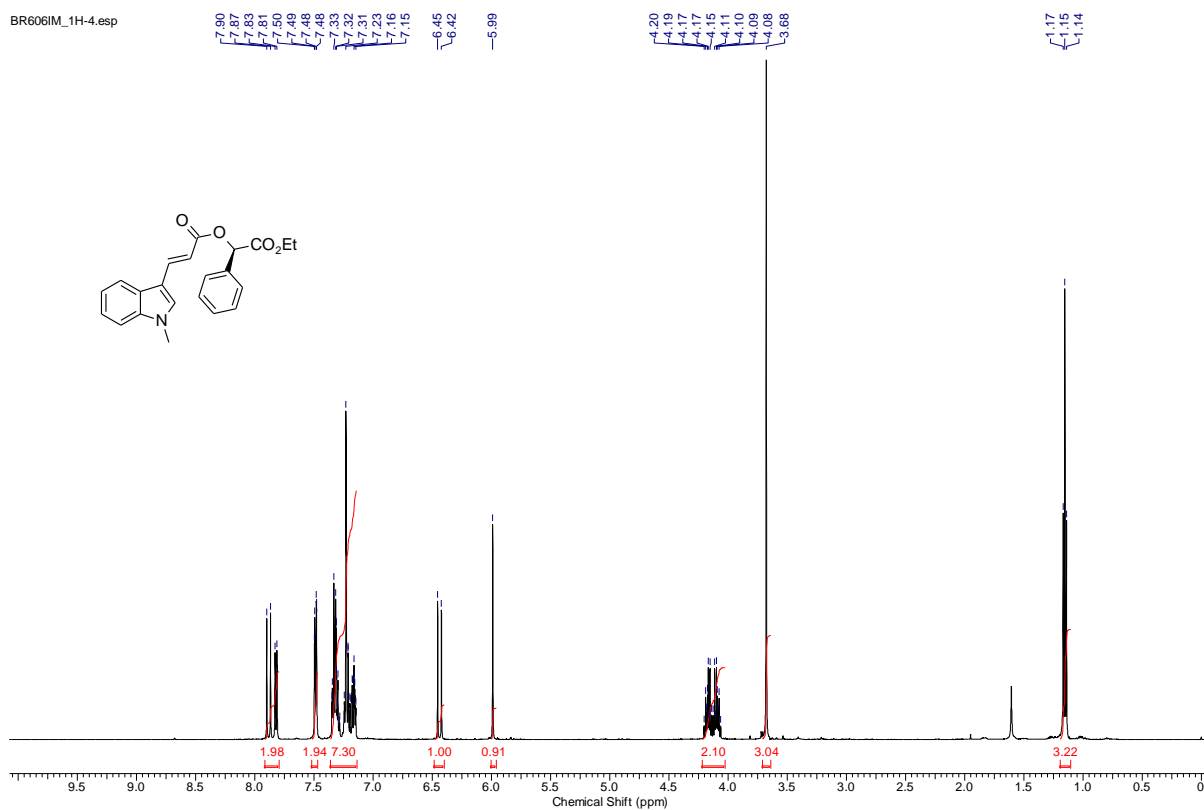

BR606IM\_13C-2.esp

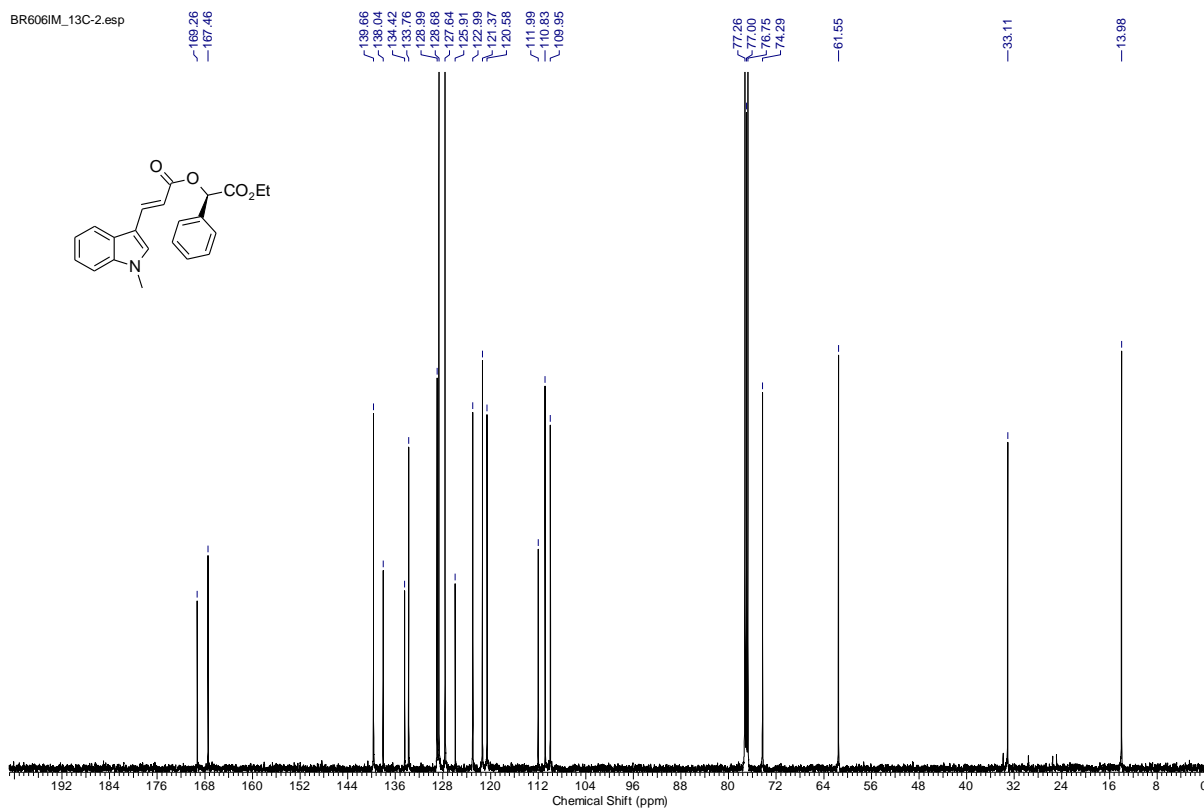

# <sup>1</sup>H and <sup>13</sup>C NMR of compound 17e

BR605IL\_1H-4.esp

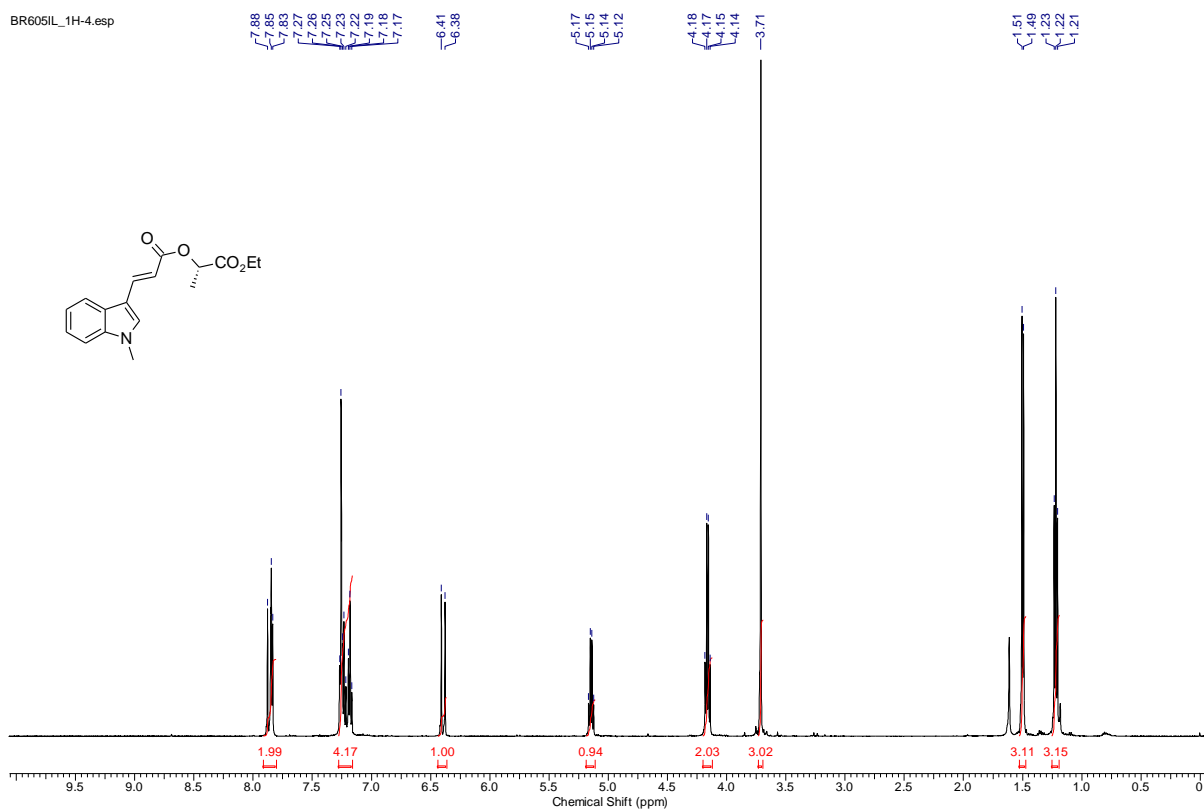

BR605IL\_13C-2.esp

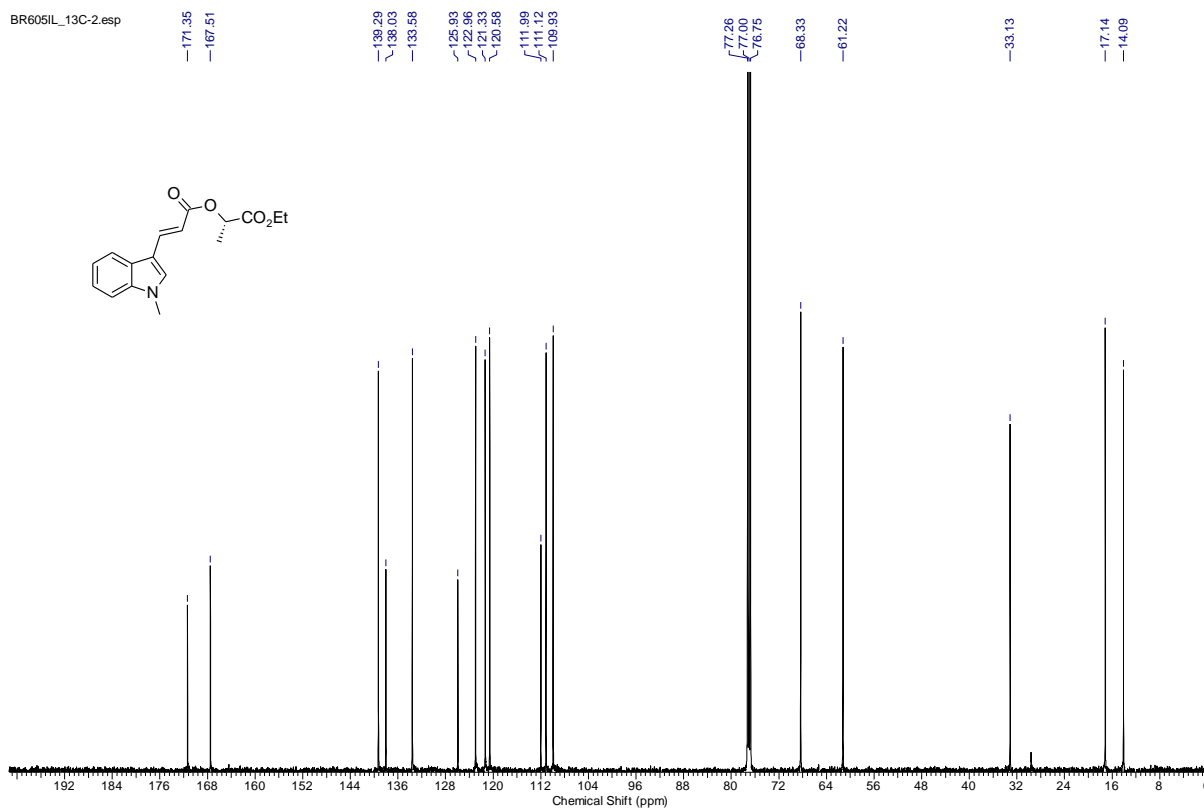

# <sup>1</sup>H and <sup>13</sup>C NMR of compound 17f

BR677PREP\_1H1non\_E13.esp

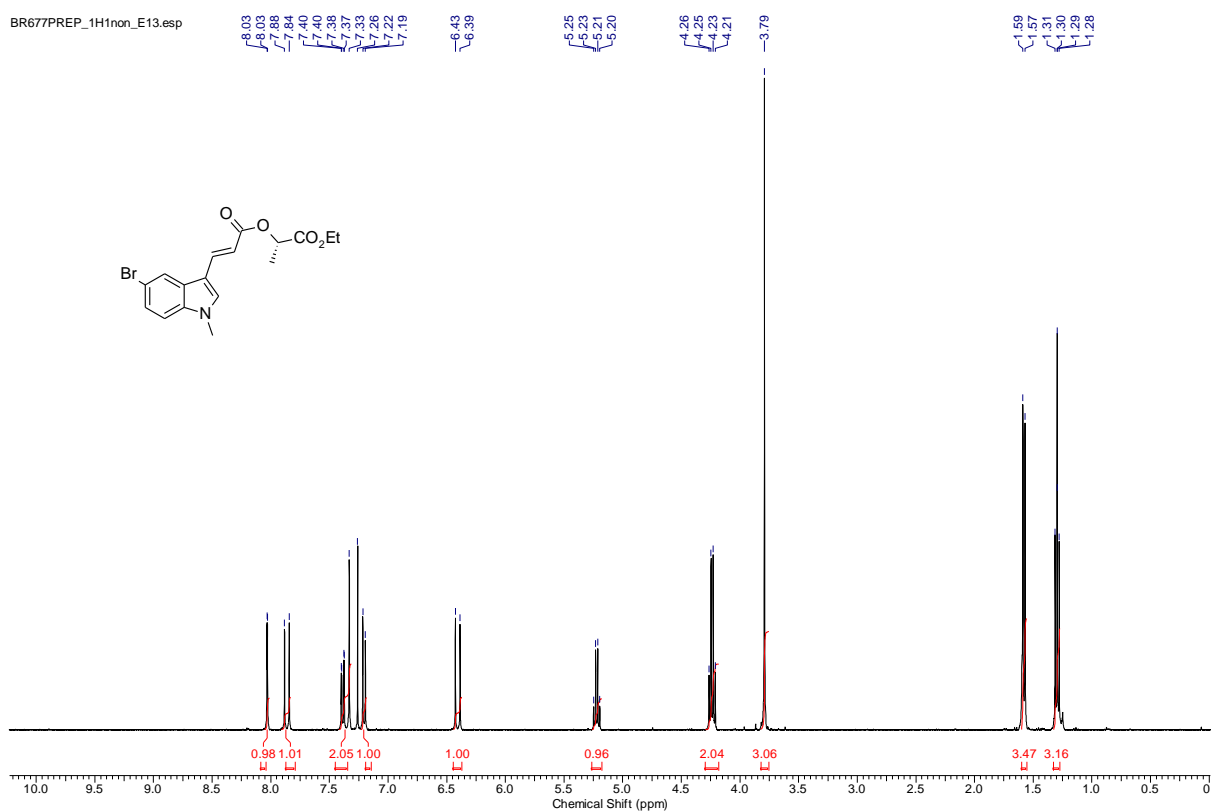

BR677PREP\_13C-2.esp

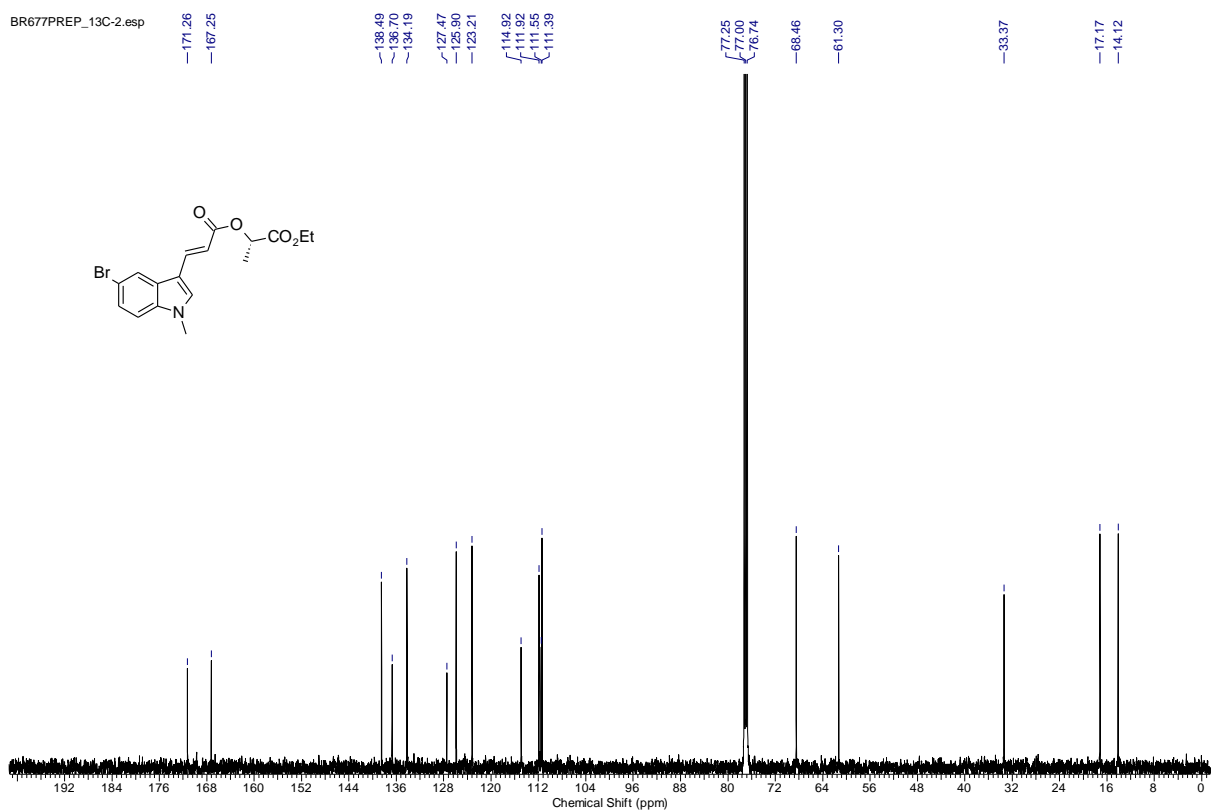

# <sup>1</sup>H and <sup>13</sup>C NMR of compound 18a

BR684PUR\_1H-4.esp

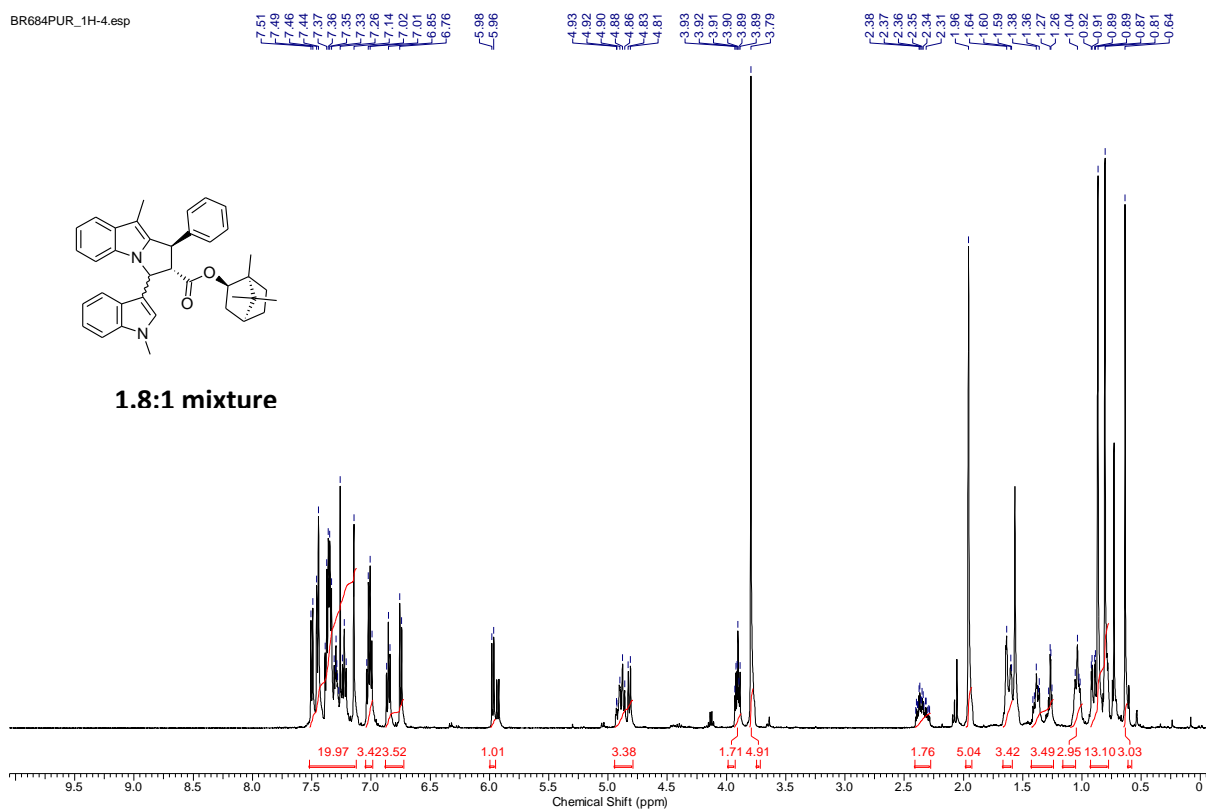

BR684PUR\_13C-4.esp

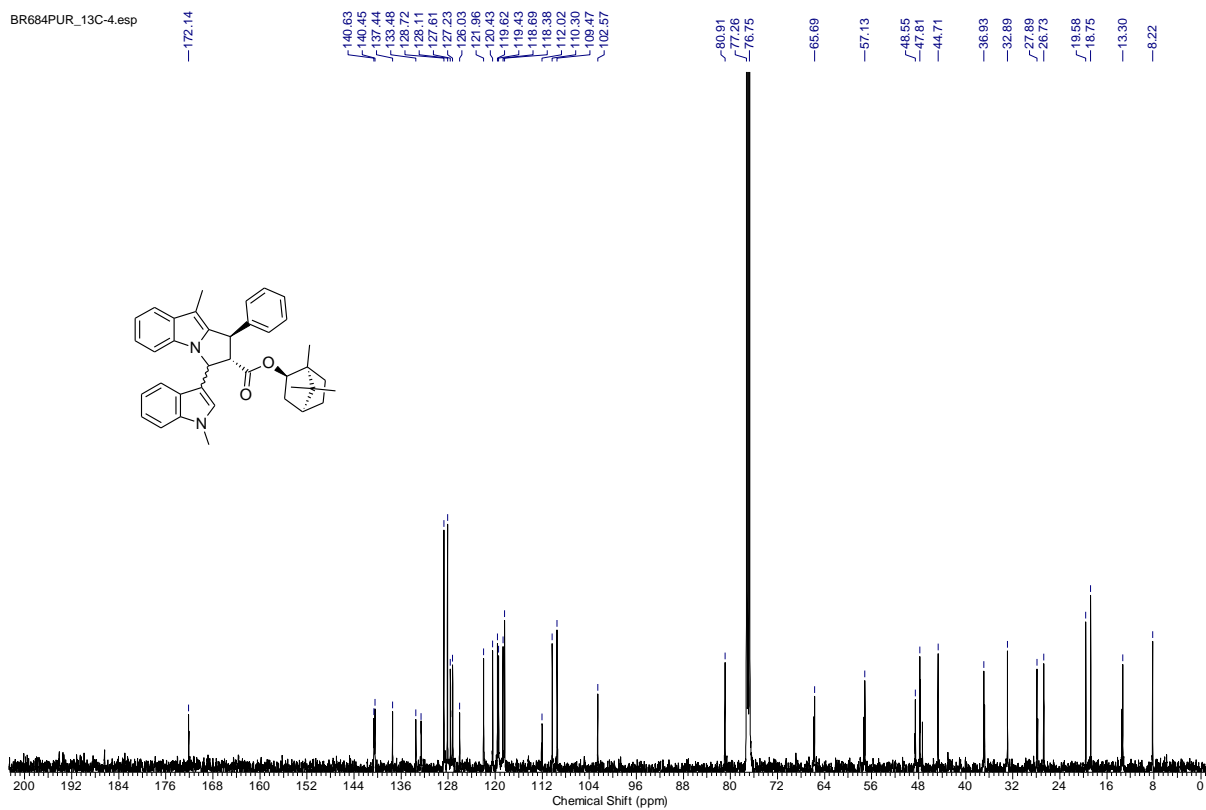

# <sup>1</sup>H and <sup>13</sup>C NMR of compound 18b

BR685PURE\_1H-5.esp

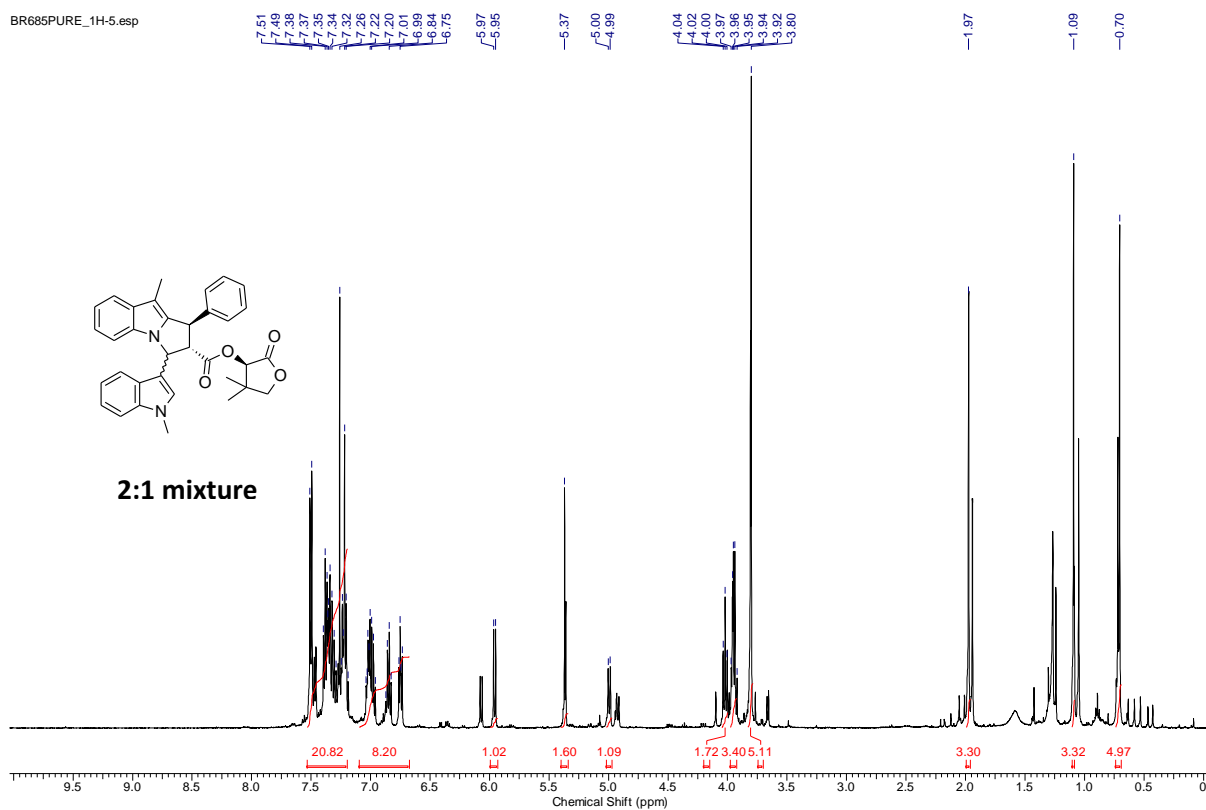

2:1 mixture

BR685PURE\_13C-3.esp

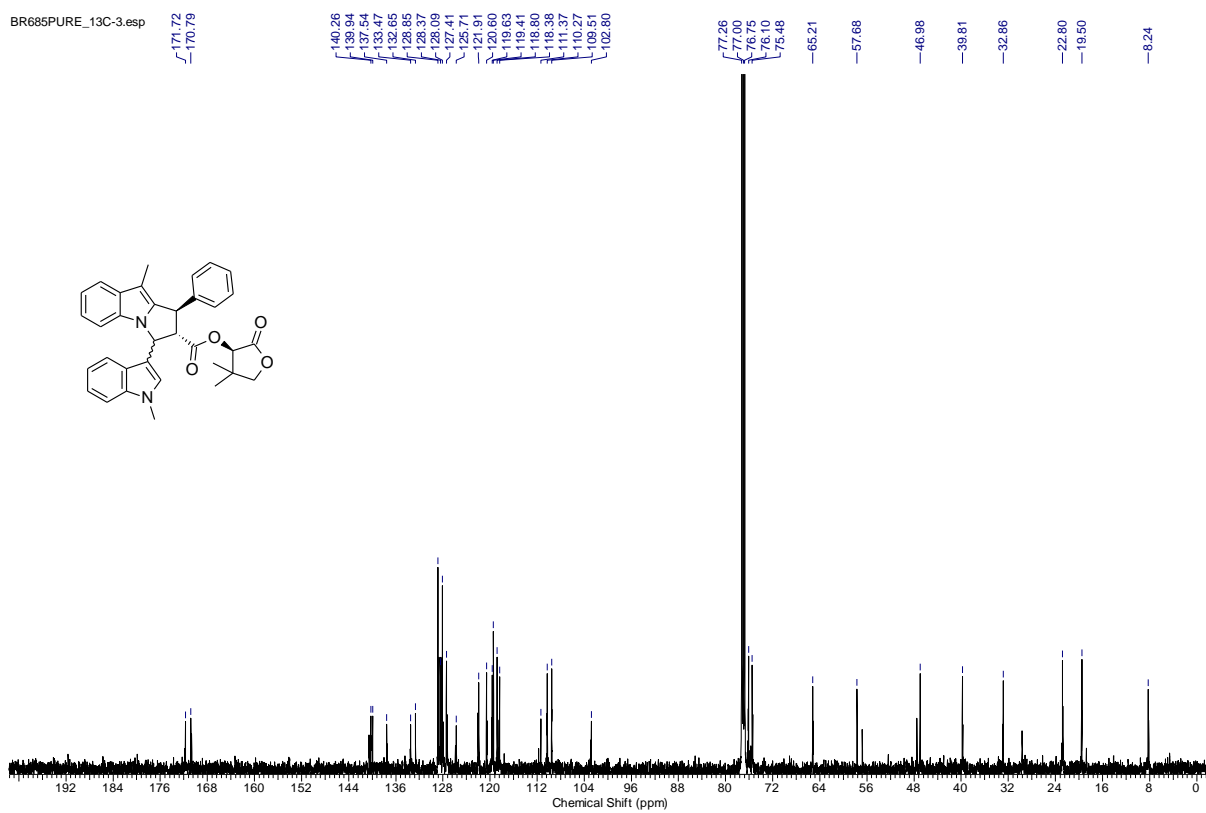

# <sup>1</sup>H and <sup>13</sup>C NMR of compound 18c

BR518TOPN\_1H-4.esp

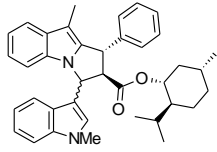

2.6:1 mixture

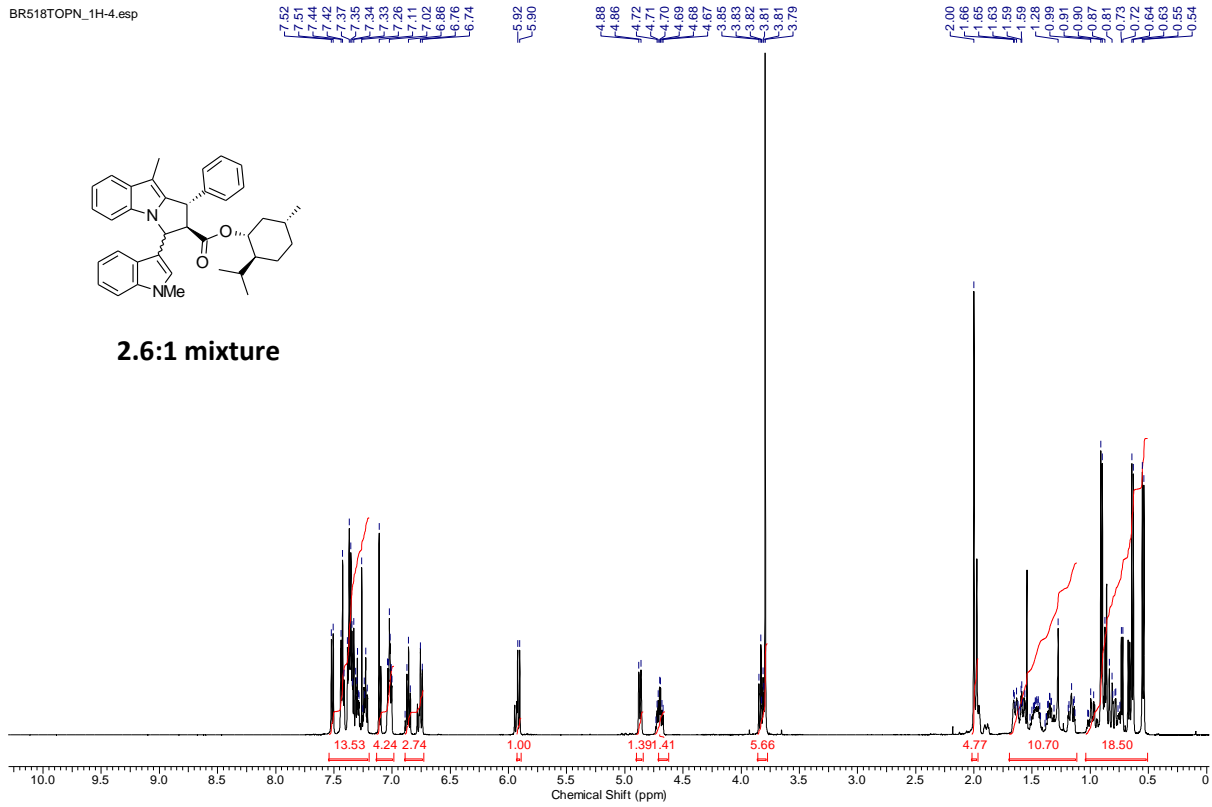

BR518TOPN\_13C-2.esp

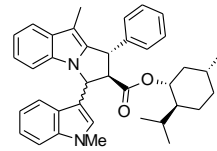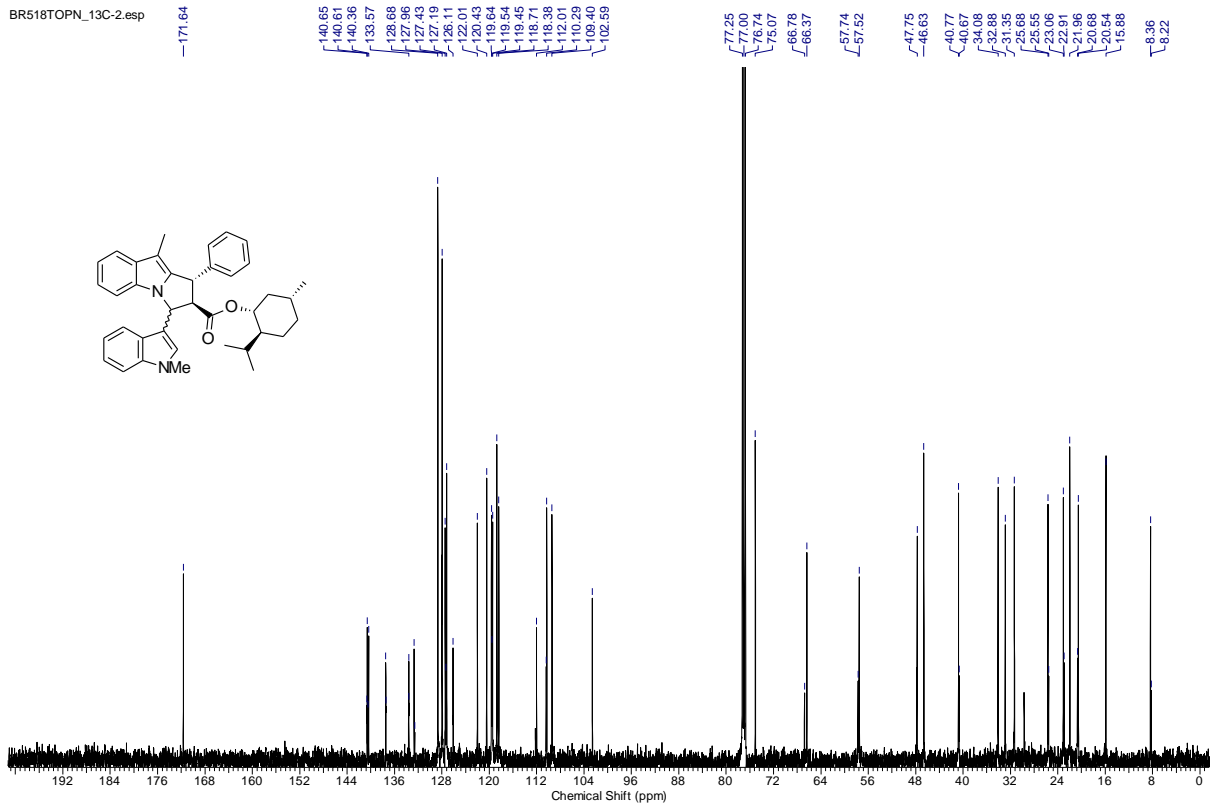

# <sup>1</sup>H NMR of compound 18c (Major isomer)

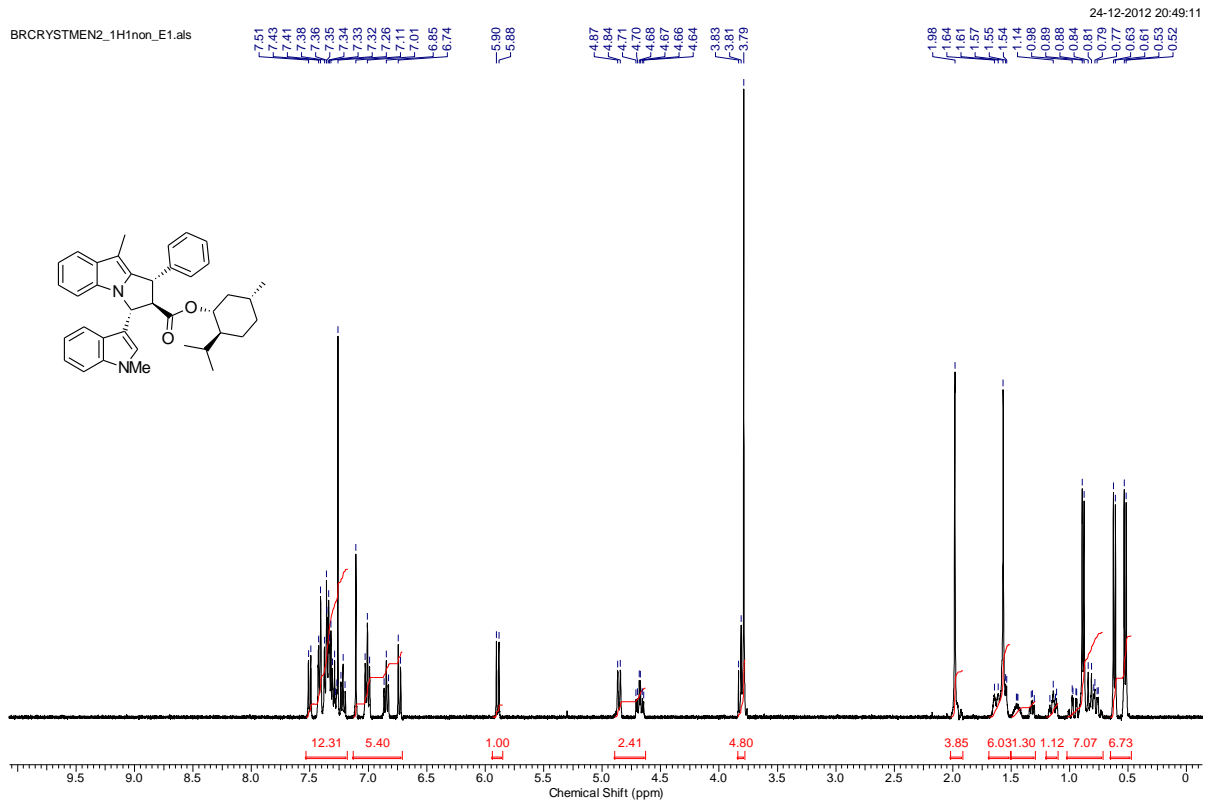

# <sup>1</sup>H and <sup>13</sup>C NMR of compound 18d

BR683PUR\_1H-4.esp

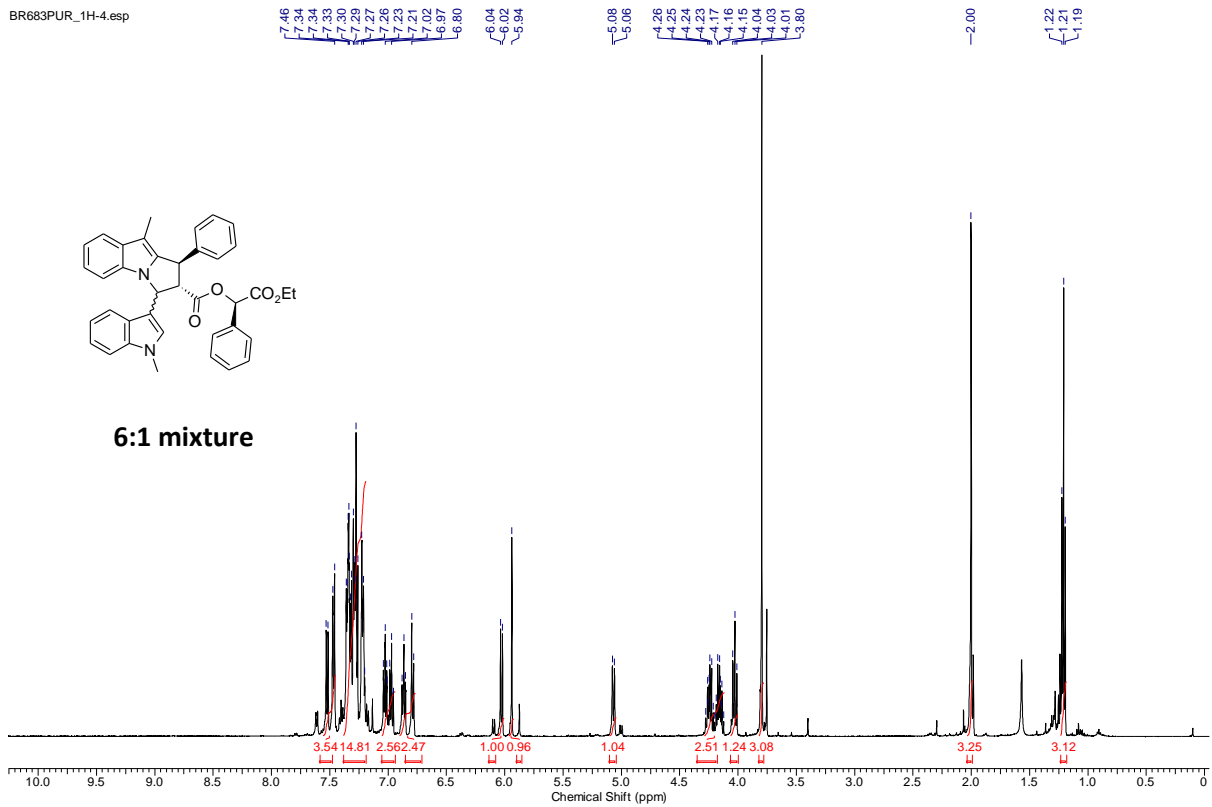

BR683PUR\_13C-3.esp

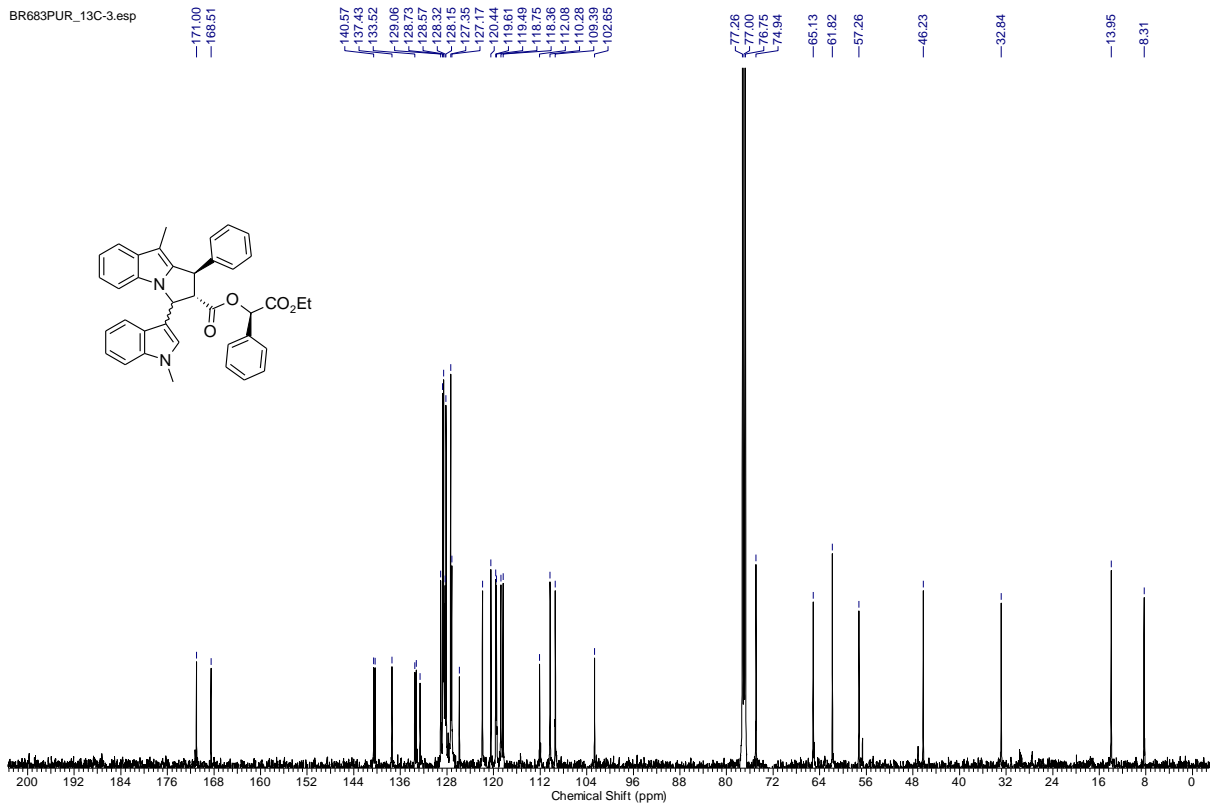



# <sup>1</sup>H and <sup>13</sup>C NMR of compound 18e

BR629PB\_1H-4.esp

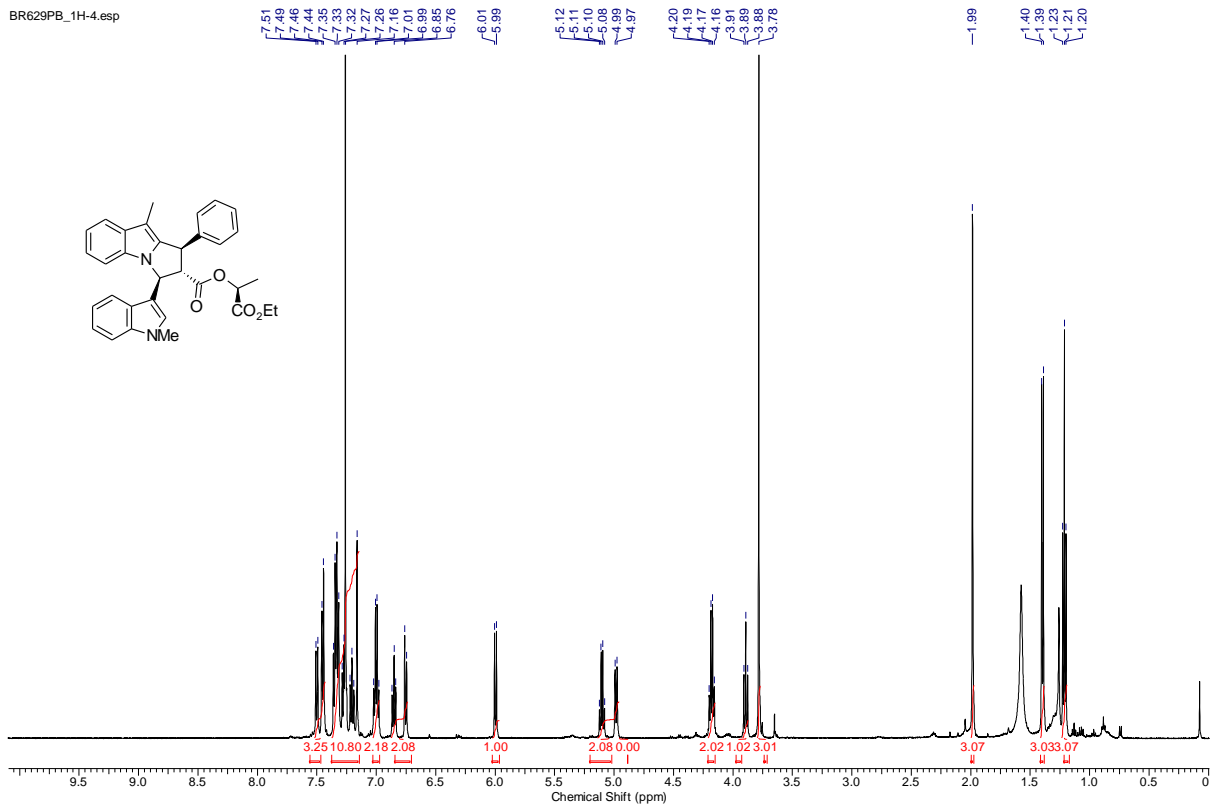

BR629PB\_13C-3.esp

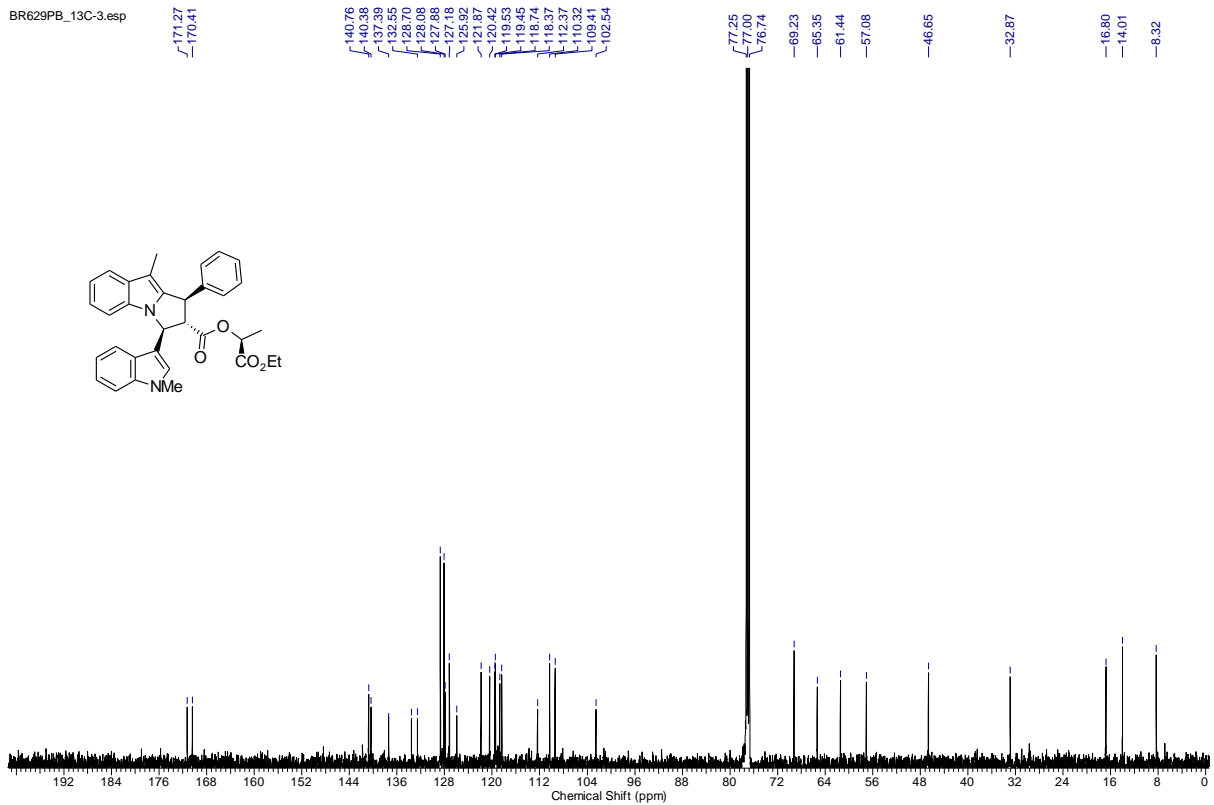

# <sup>1</sup>H and <sup>13</sup>C NMR of compound 18f

BRBROEL2\_1H-new.esp

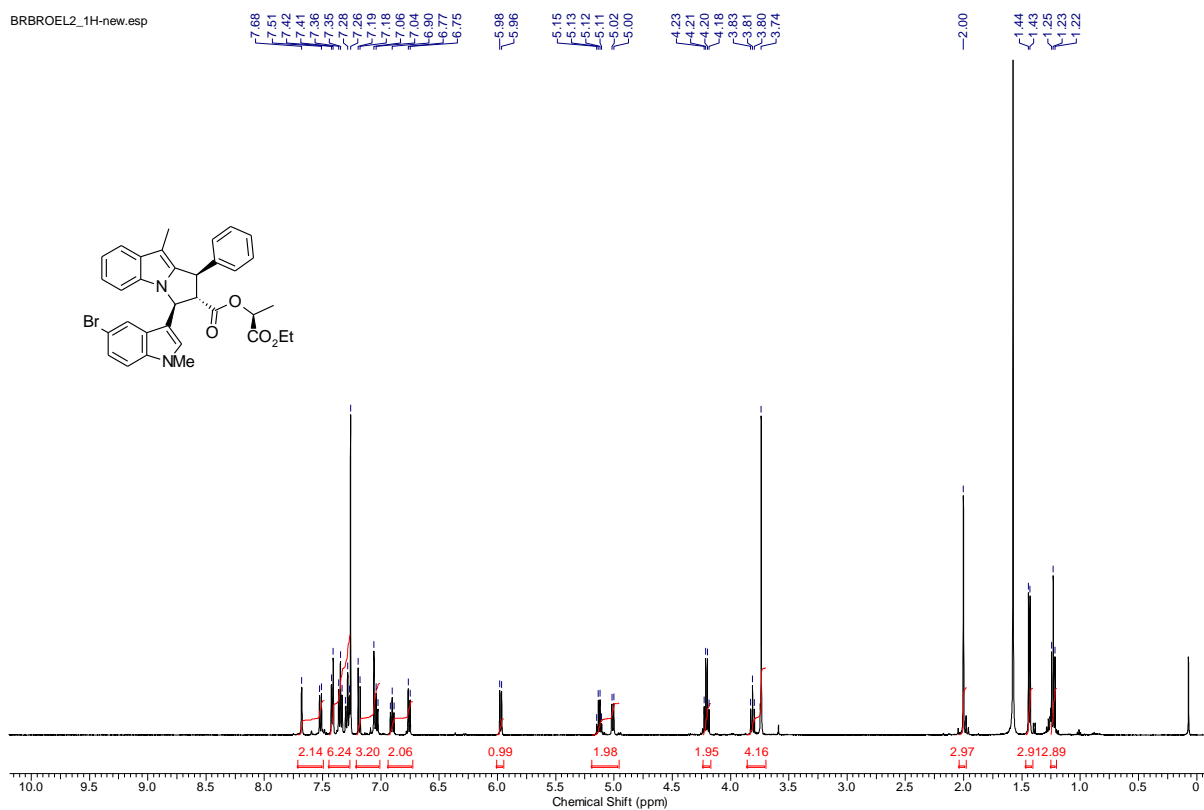

BR590PT\_13C-2.esp

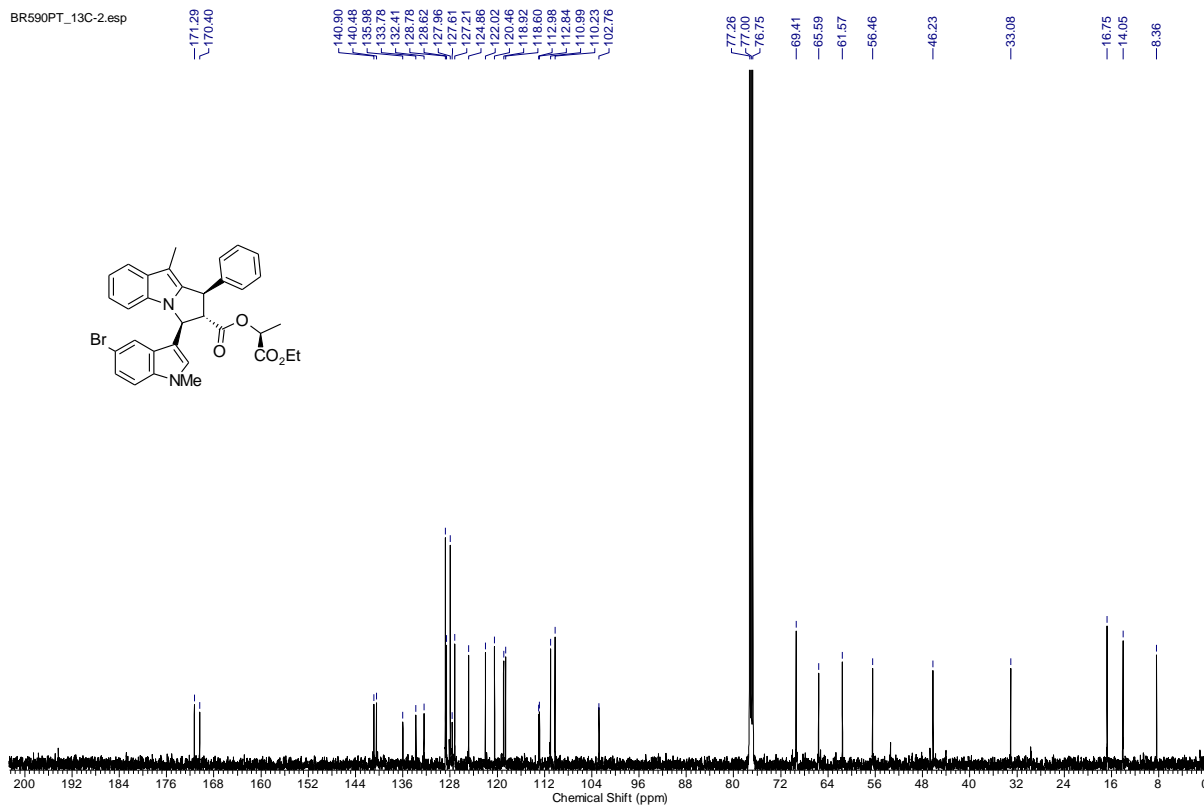

# <sup>1</sup>H and <sup>13</sup>C NMR of compound 18h

BR681PREP\_1H1non\_E15.esp

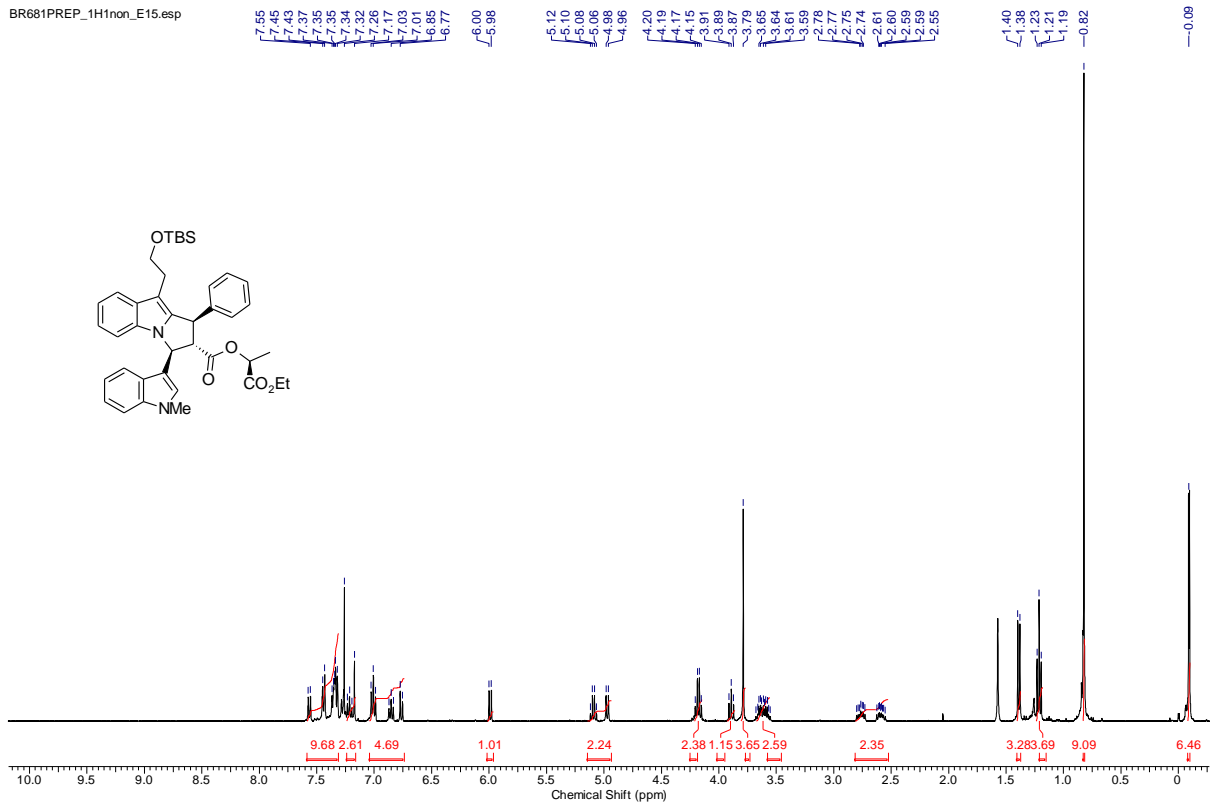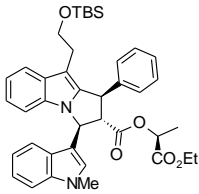

BR681PREP\_13C-4.esp

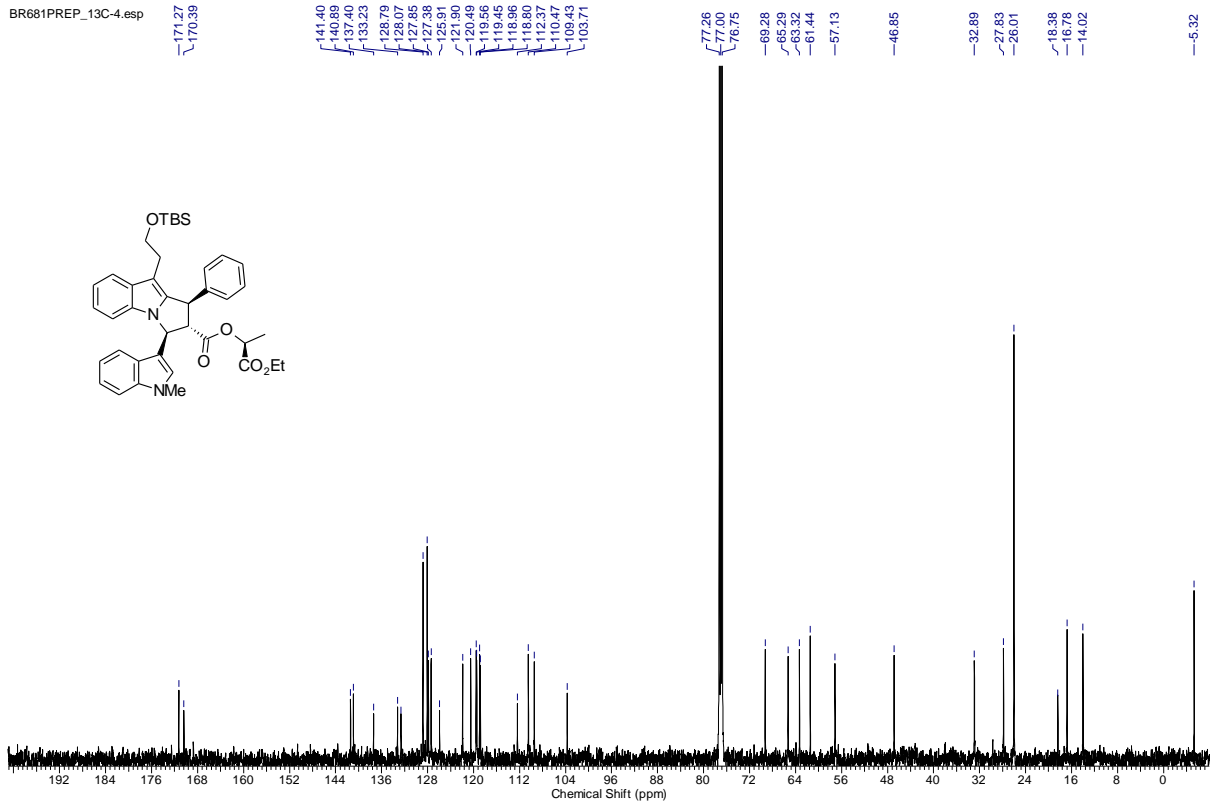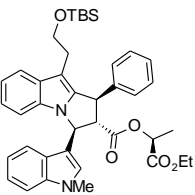

# <sup>1</sup>H and <sup>13</sup>C NMR of compound 18i

BR\_649final.esp

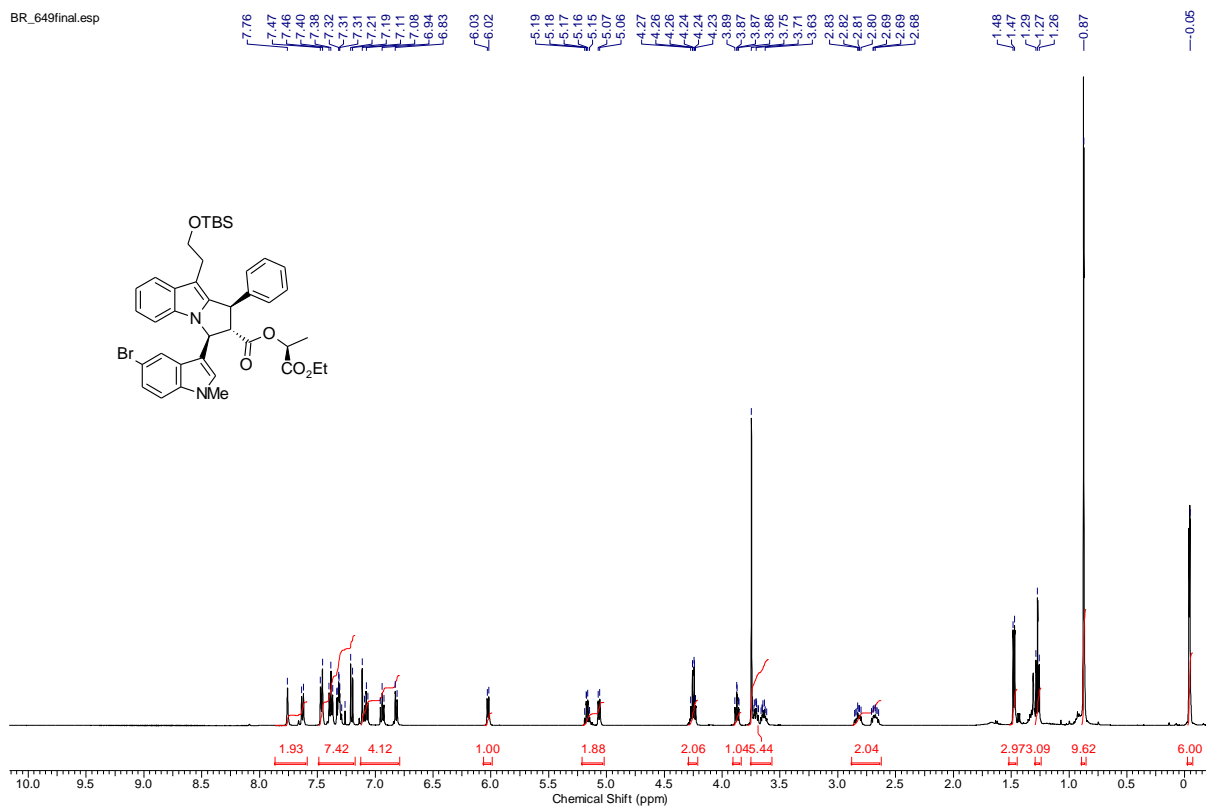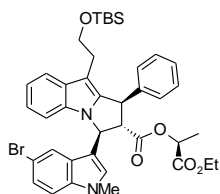

BR647\_13C-2.esp

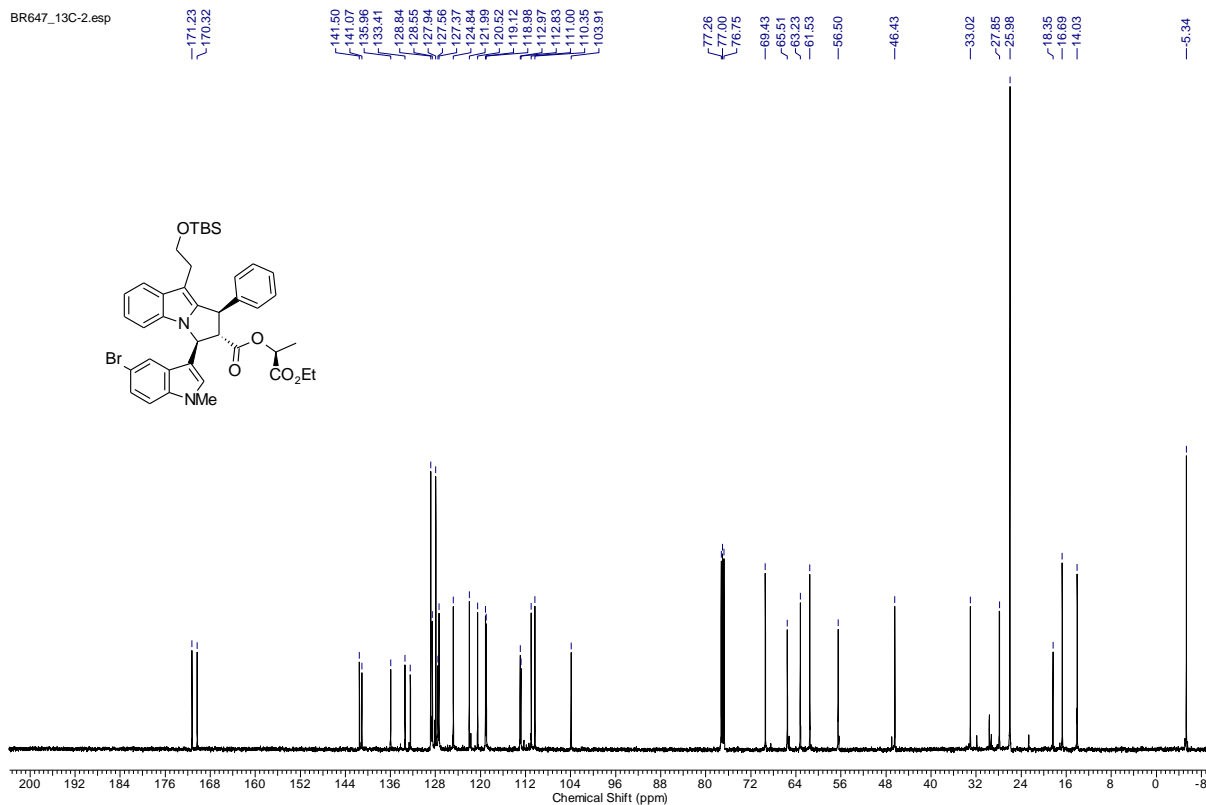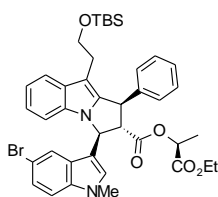

# <sup>1</sup>H and <sup>13</sup>C NMR of compound 18g

BR638PREBE\_1H-4.esp

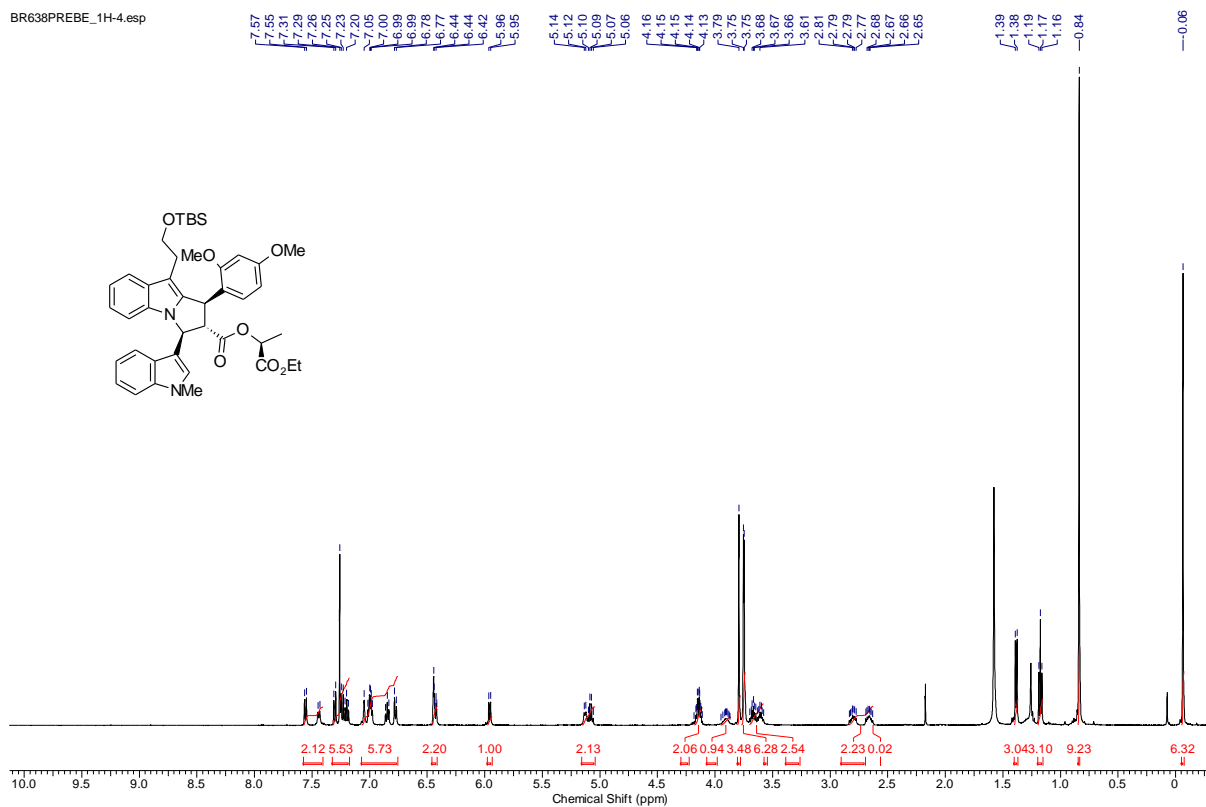

BR638PBF\_13C-3.esp

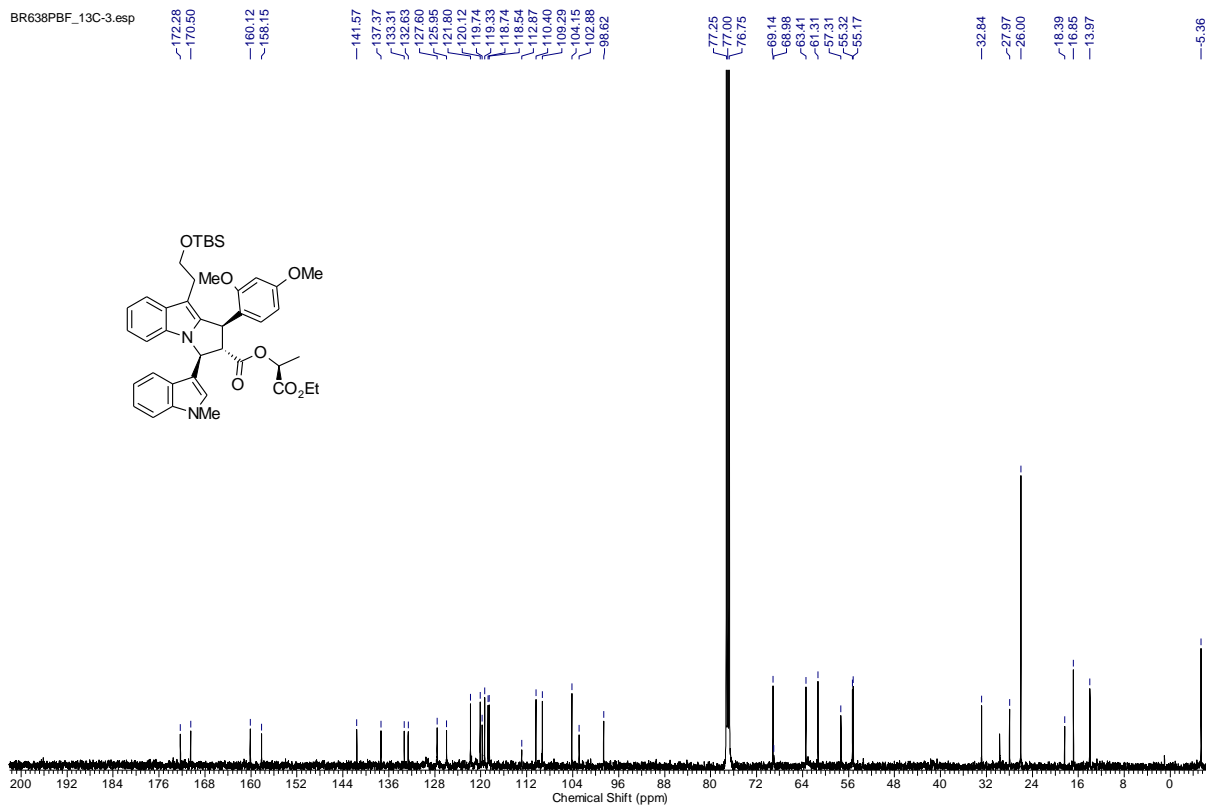

# <sup>1</sup>H and <sup>13</sup>C NMR of compound 19a

BR726\_1H1non\_E22.esp

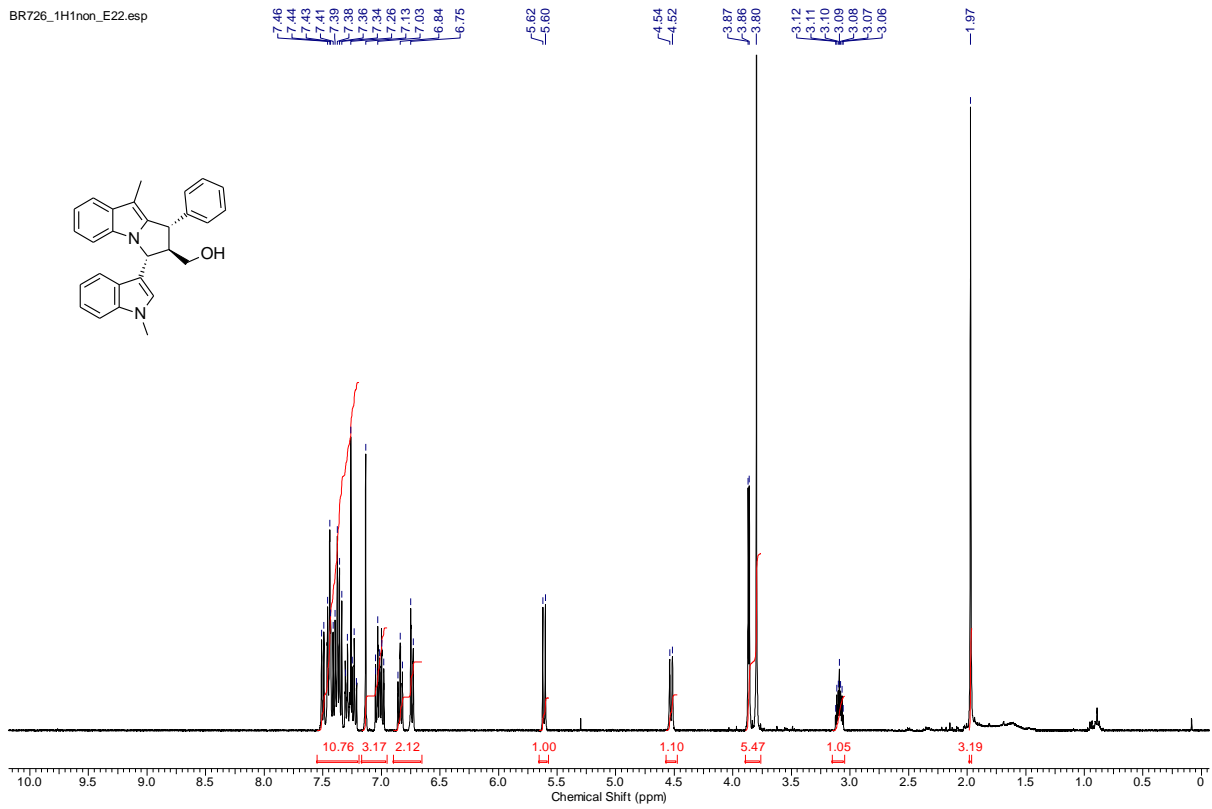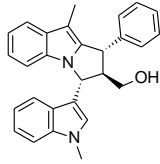

BR723PURE\_13C-2.esp

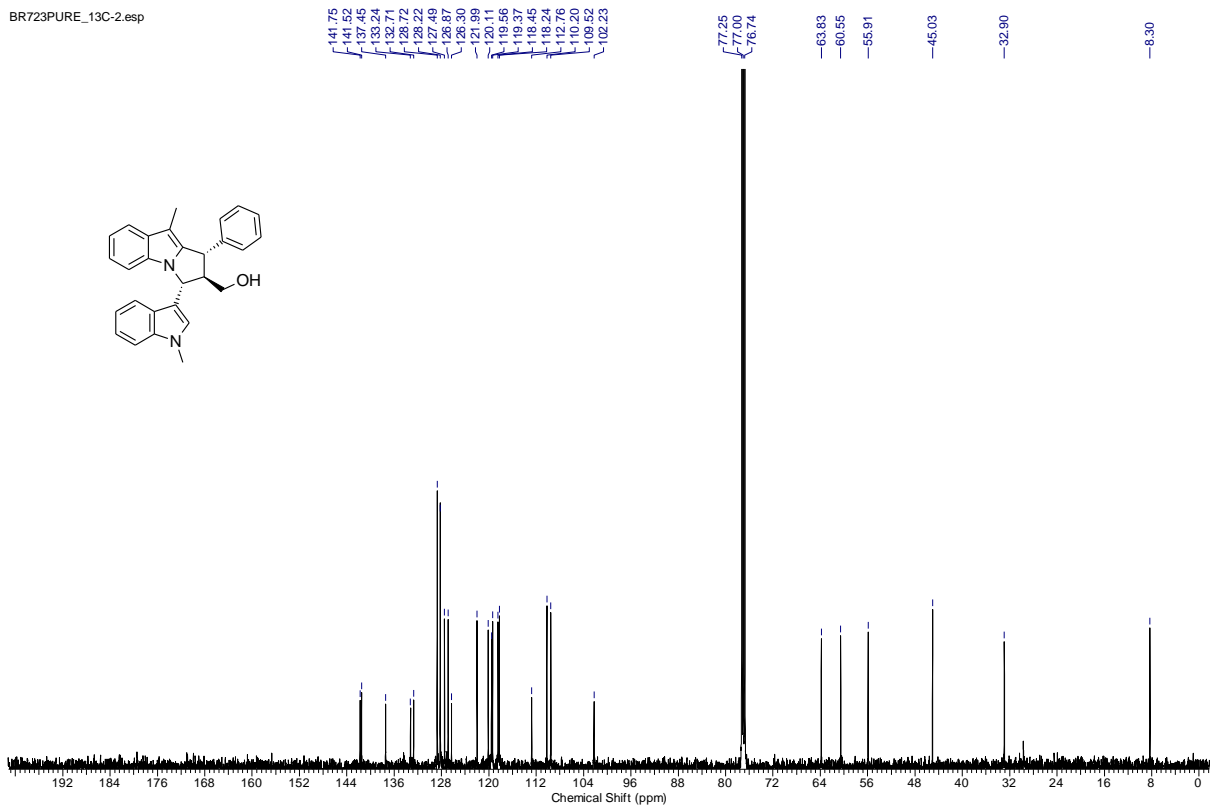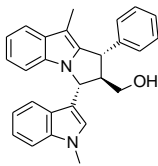

Supplement: c6ob00861e1.pdf [file c6ob00861e1.pdf]
